# Supplementary material for: A novel intramolecular Ugi reaction with 7-azabicyclo[2.2.1]heptane derivatives followed by post-condensation acylations: a new entry to azanorbornyl peptidomimetics
Source: Royal Society of Chemistry journal article supplement (doi:10.1039/b812304g), 2008-11-05

**A Novel Intramolecular Ugi Reaction with 7-Azabicyclo[2.2.1]heptane Derivatives Followed by Post-Condensation Acylations: a New Entry to Azanorbornyl Peptidomimetics**

Andrea Basso, Luca Banfi, Giuseppe Guanti and Renata Riva  
Università degli Studi di Genova, Dipartimento di Chimica e Chimica Industriale.  
Via Dodecaneso 31, 16146 Genova (Italy)

**Supplementary Material**  
Analytical data for compounds **13a-m**

## HR-MS data for compounds 13a-m

| Structure                                                                           | Data:                                                                                                                                                                                   |
|-------------------------------------------------------------------------------------|-----------------------------------------------------------------------------------------------------------------------------------------------------------------------------------------|
| 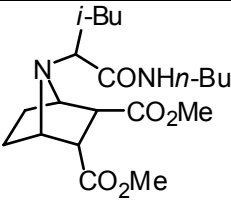   | Identification: <b>13a</b><br>Formula: <b>C<sub>20</sub>H<sub>34</sub>N<sub>2</sub>O<sub>5</sub></b><br>Exact Mass: <b>382,2468</b><br>Analysis: <b>HR-IE</b><br>Found: <b>382,2463</b> |
|    | Identification: <b>13b</b><br>Formula: <b>C<sub>20</sub>H<sub>34</sub>N<sub>2</sub>O<sub>5</sub></b><br>Exact Mass: <b>382,2468</b><br>Analysis: <b>HR-IE</b><br>Found: <b>382,2474</b> |
|    | Identification: <b>13c</b><br>Formula: <b>C<sub>19</sub>H<sub>32</sub>N<sub>2</sub>O<sub>5</sub></b><br>Exact Mass: <b>368,2311</b><br>Analysis: <b>HR-IE</b><br>Found: <b>368,2320</b> |
|  | Identification: <b>13d</b><br>Formula: <b>C<sub>18</sub>H<sub>28</sub>N<sub>2</sub>O<sub>7</sub></b><br>Exact Mass: <b>384,1897</b><br>Analysis: <b>HR-IE</b><br>Found: <b>384,1906</b> |
|  | Identification: <b>13e</b><br>Formula: <b>C<sub>21</sub>H<sub>28</sub>N<sub>2</sub>O<sub>5</sub></b><br>Exact Mass: <b>388,1998</b><br>Analysis: <b>HR-IE</b><br>Found: <b>388,1992</b> |
|  | Identification: <b>13f</b><br>Formula: <b>C<sub>18</sub>H<sub>28</sub>N<sub>2</sub>O<sub>5</sub></b><br>Exact Mass: <b>352,1998</b><br>Analysis: <b>HR-IE</b><br>Found: <b>352,1994</b> |
|  | Identification: <b>13g</b><br>Formula: <b>C<sub>17</sub>H<sub>28</sub>N<sub>2</sub>O<sub>5</sub></b><br>Exact Mass: <b>340,1998</b><br>Analysis: <b>HR-IE</b><br>Found: <b>340,1998</b> |

|                                                                                     |                                                                                                                                                                          |
|-------------------------------------------------------------------------------------|--------------------------------------------------------------------------------------------------------------------------------------------------------------------------|
| 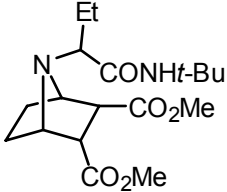    | <p>Identification: <b>13h</b><br/> Formula: <math>C_{18}H_{30}N_2O_5</math><br/> Exact Mass: <b>354,2155</b><br/> Analysis: <b>HR-IE</b><br/> Found: <b>354,2161</b></p> |
|    | <p>Identification: <b>13i</b><br/> Formula: <math>C_{24}H_{32}N_2O_5</math><br/> Exact Mass: <b>428,2311</b><br/> Analysis: <b>HR-IE</b><br/> Found: <b>428,2305</b></p> |
|    | <p>Identification: <b>13j</b><br/> Formula: <math>C_{25}H_{28}N_2O_5</math><br/> Exact Mass: <b>436,1998</b><br/> Analysis: <b>HR-IE</b><br/> Found: <b>436,2002</b></p> |
|   | <p>Identification: <b>13k</b><br/> Formula: <math>C_{21}H_{32}N_2O_7</math><br/> Exact Mass: <b>424,2210</b><br/> Analysis: <b>HR-IE</b><br/> Found: <b>424,2219</b></p> |
|  | <p>Identification: <b>13l</b><br/> Formula: <math>C_{26}H_{44}N_2O_5</math><br/> Exact Mass: <b>464,3250</b><br/> Analysis: <b>HR-IE</b><br/> Found: <b>464,3260</b></p> |
|  | <p>Identification: <b>13m</b><br/> Formula: <math>C_{23}H_{32}N_2O_6</math><br/> Exact Mass: <b>432,2260</b><br/> Analysis: <b>HR-IE</b><br/> Found: <b>432,2250</b></p> |

### Compound 13a

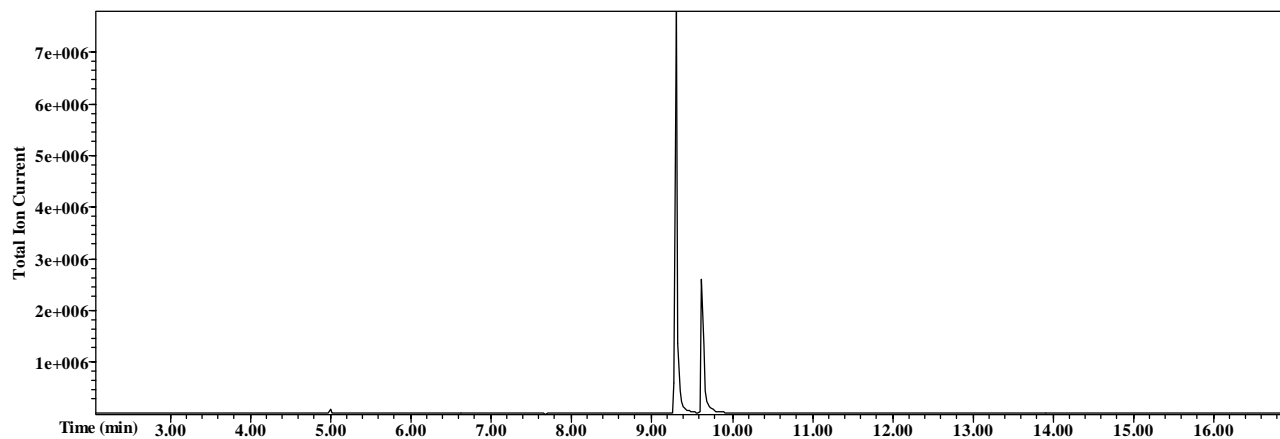

Acquired : 10 Dec 107 5:38 pm using AcqMethod ANDHIGH

---

| Retention Time | Area | Area % | Ratio % |
|----------------|------|--------|---------|
|----------------|------|--------|---------|

---

#### Total Ion Chromatogram

|       |           |        |         |
|-------|-----------|--------|---------|
| 9.322 | 150914537 | 67.554 | 100.000 |
| 9.647 | 72483774  | 32.446 | 48.030  |

---

### Major Diastereoisomer

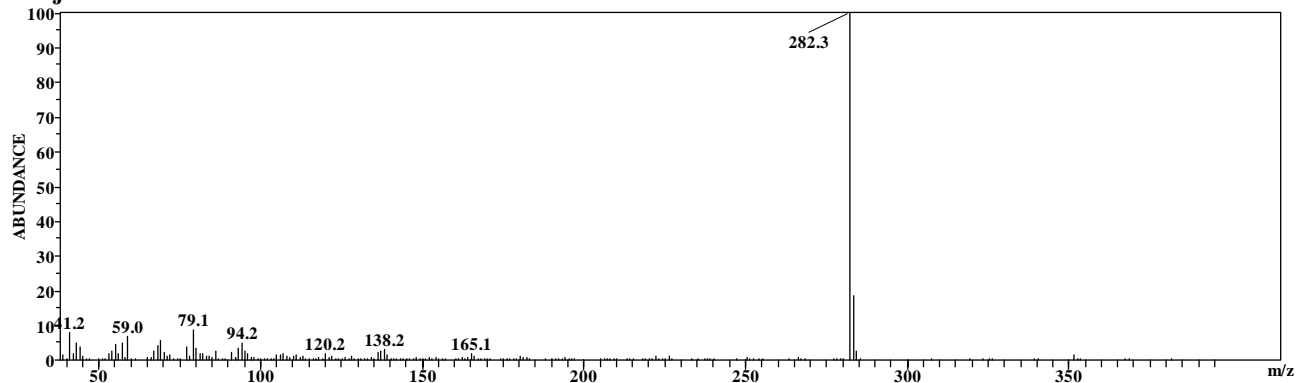

### Minor Diastereoisomer

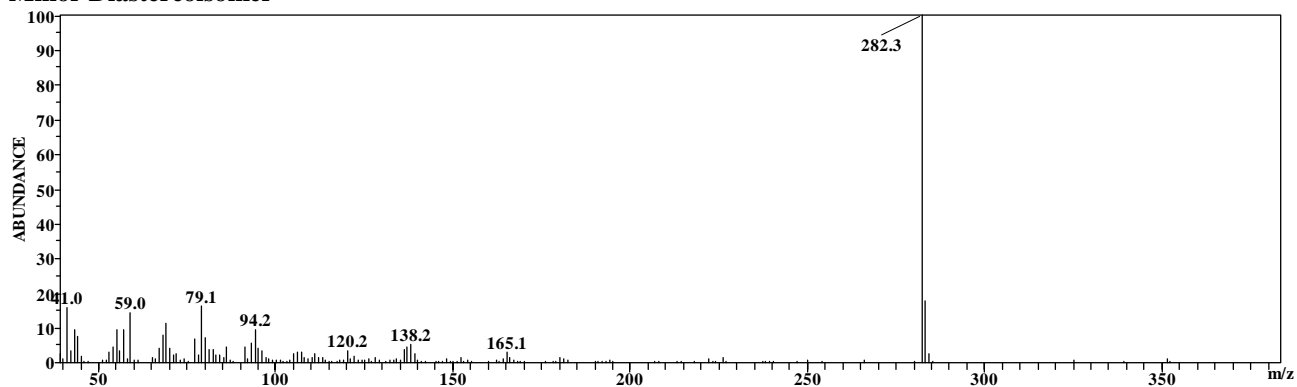

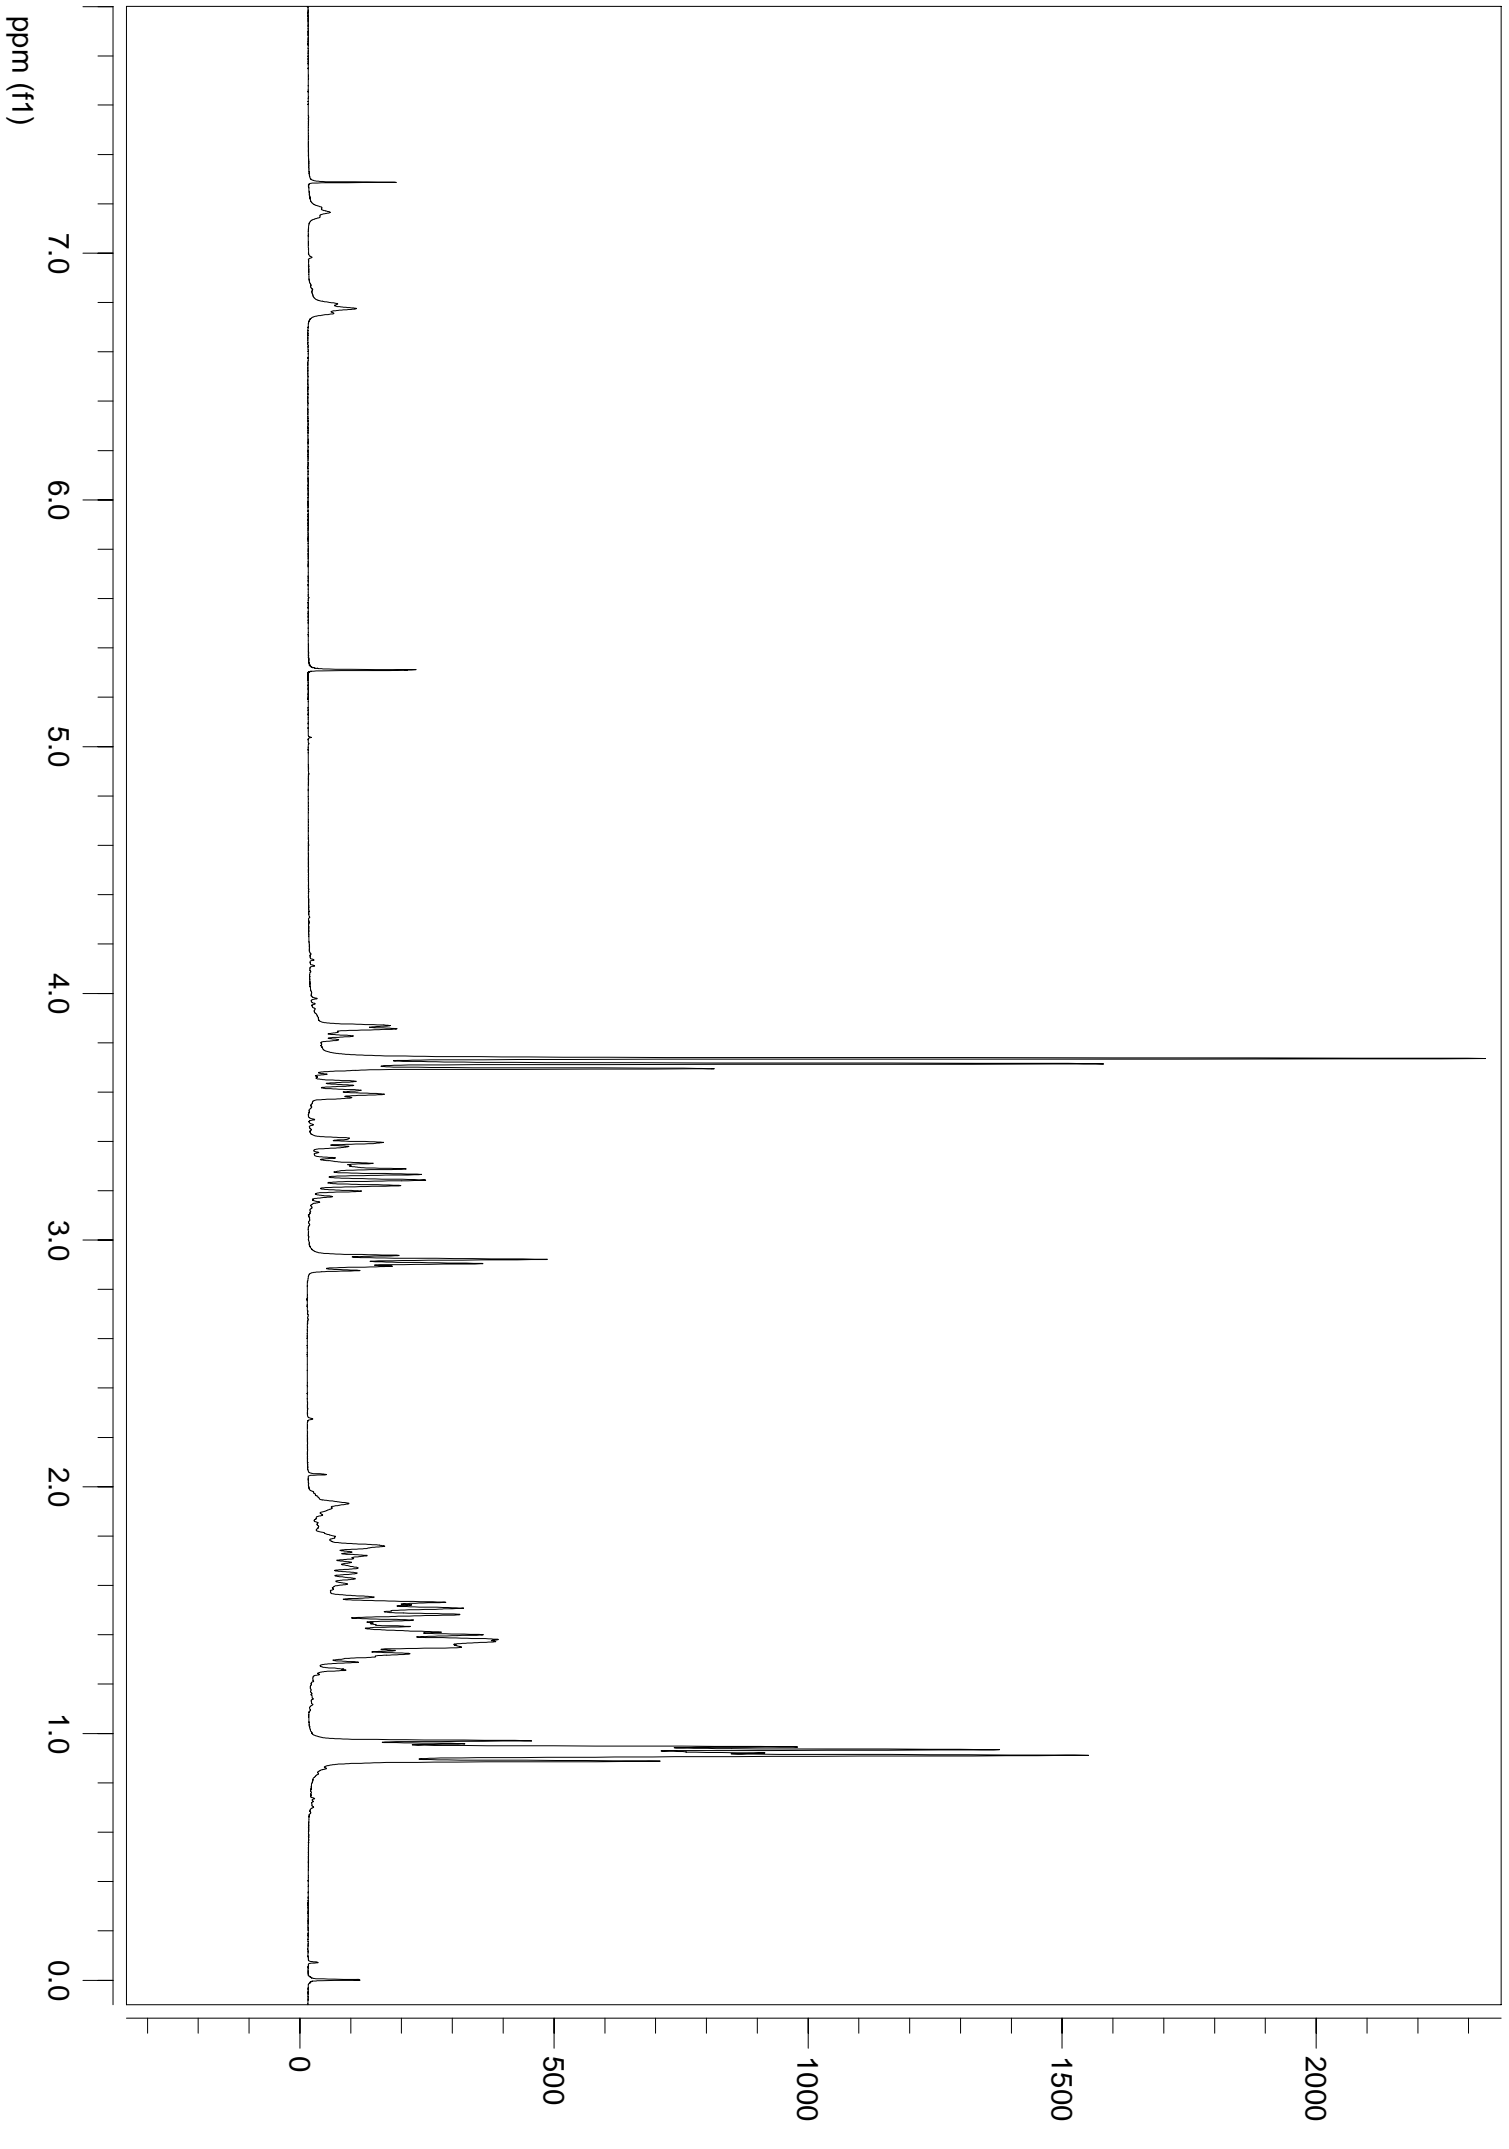

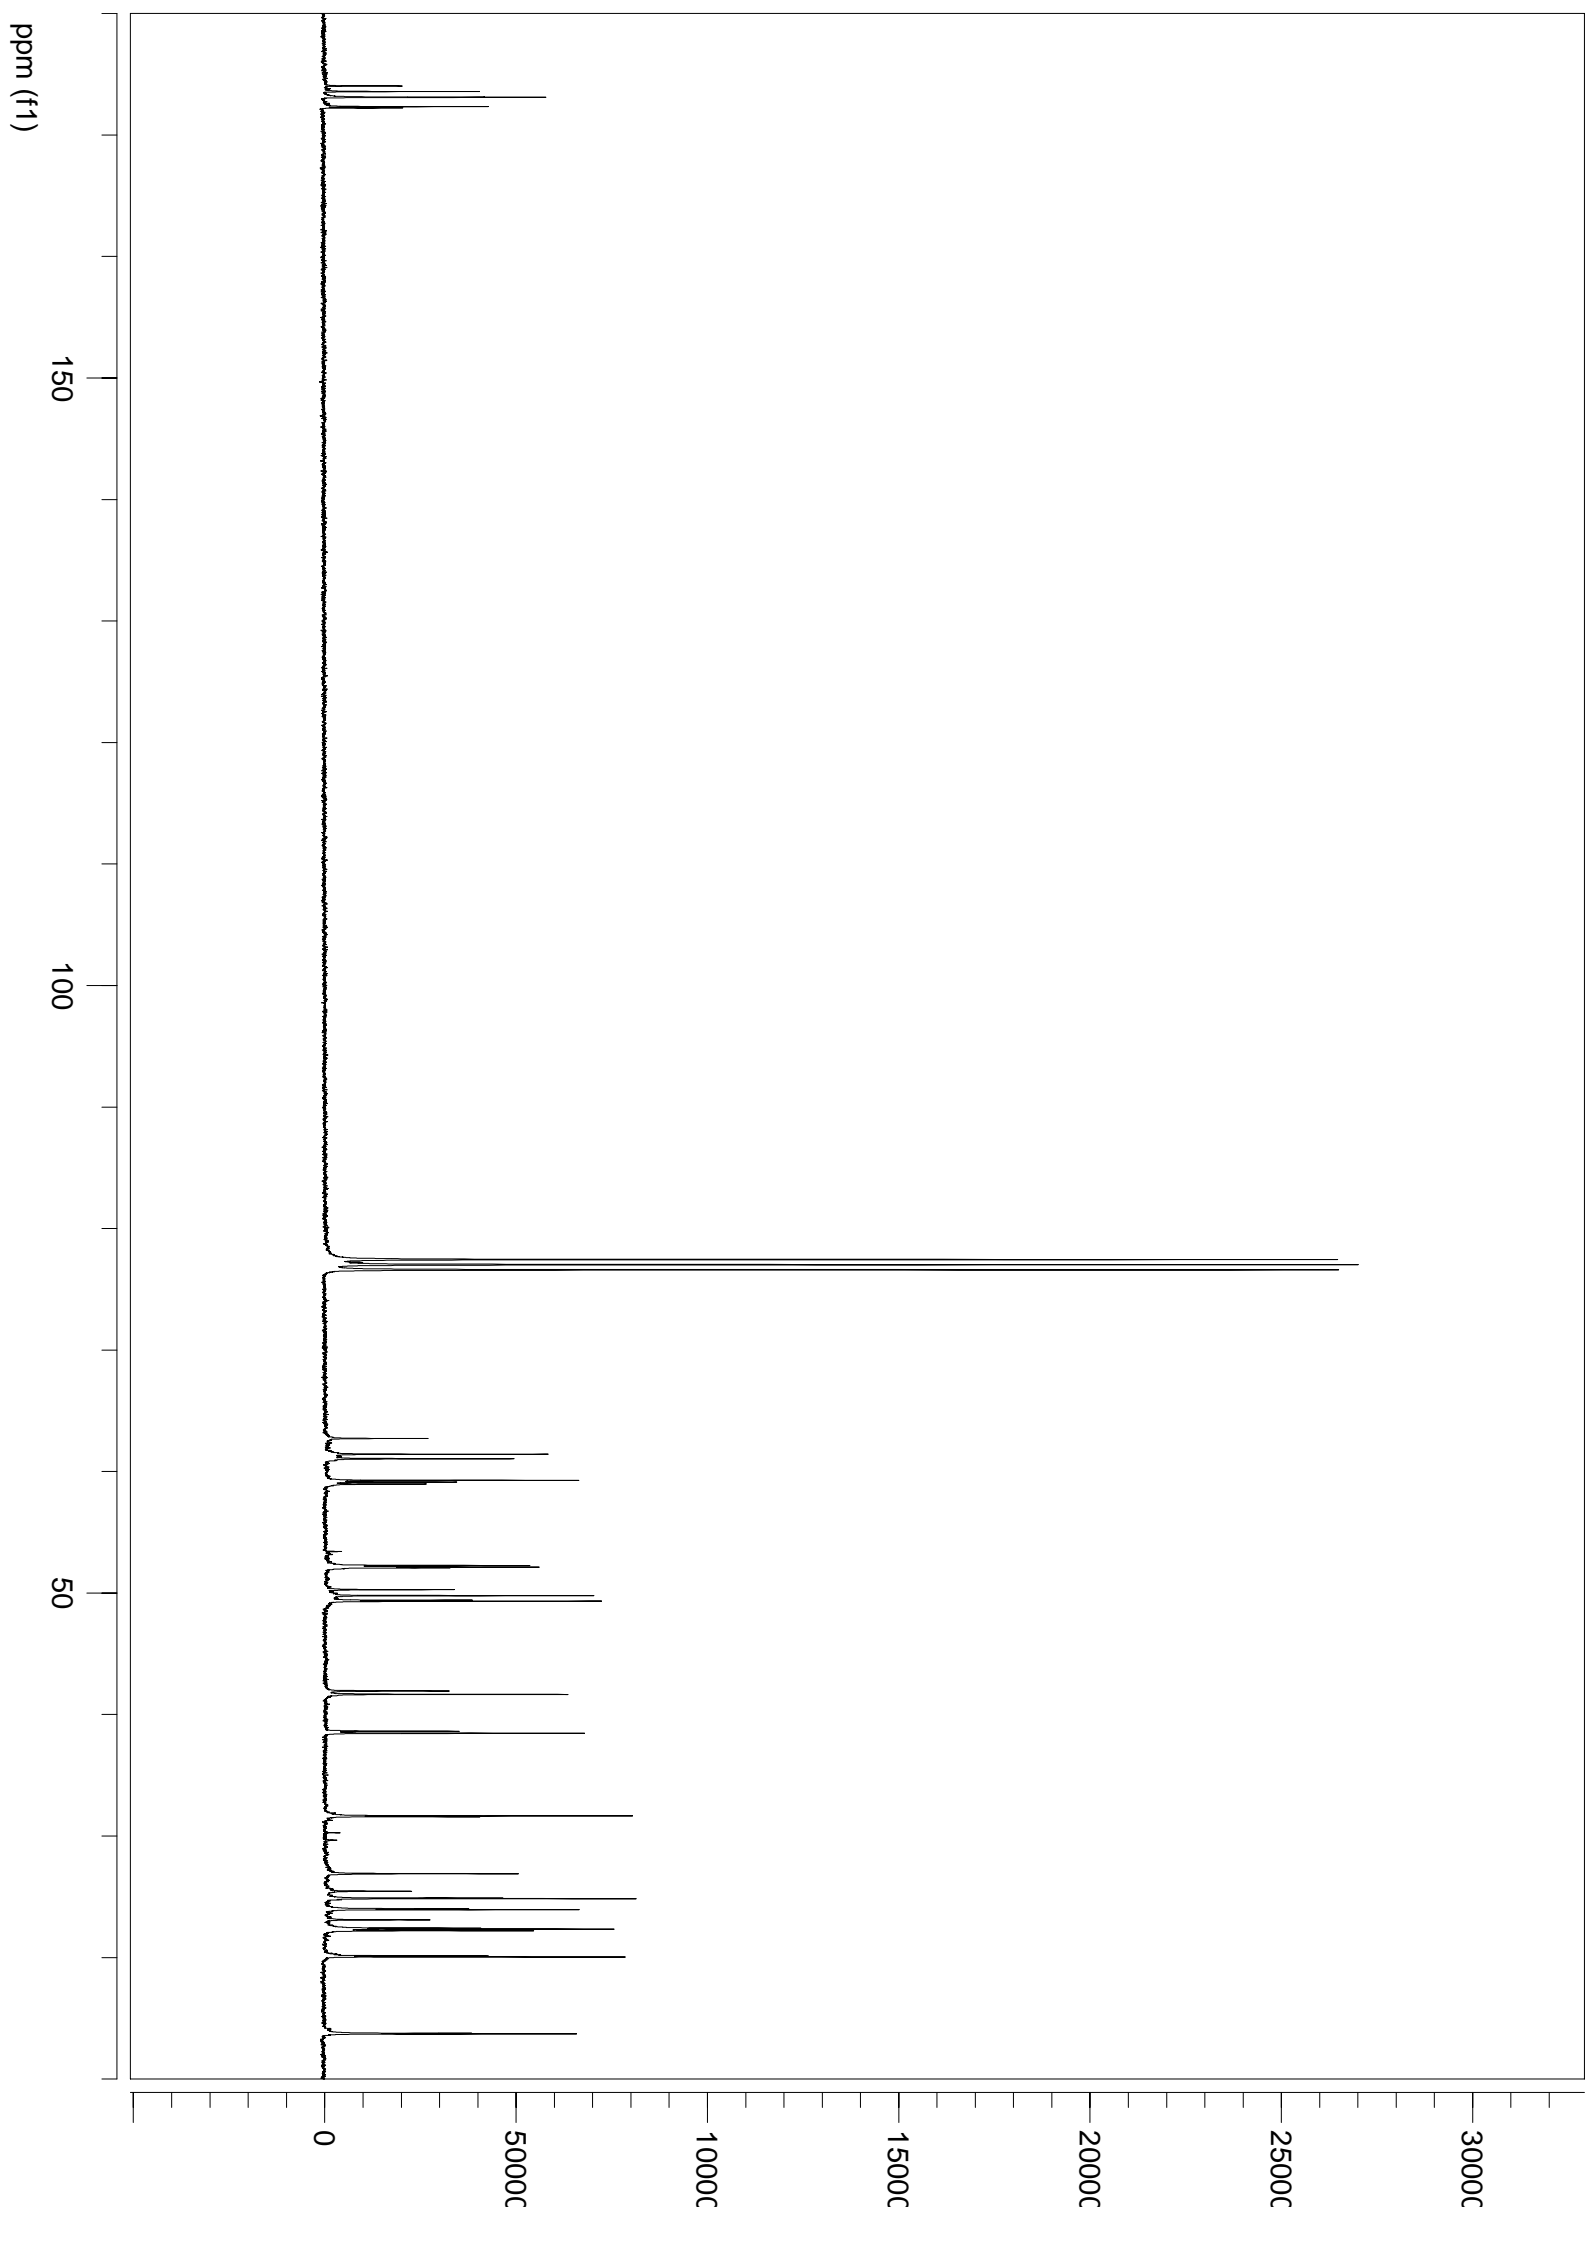

### Compound 13b

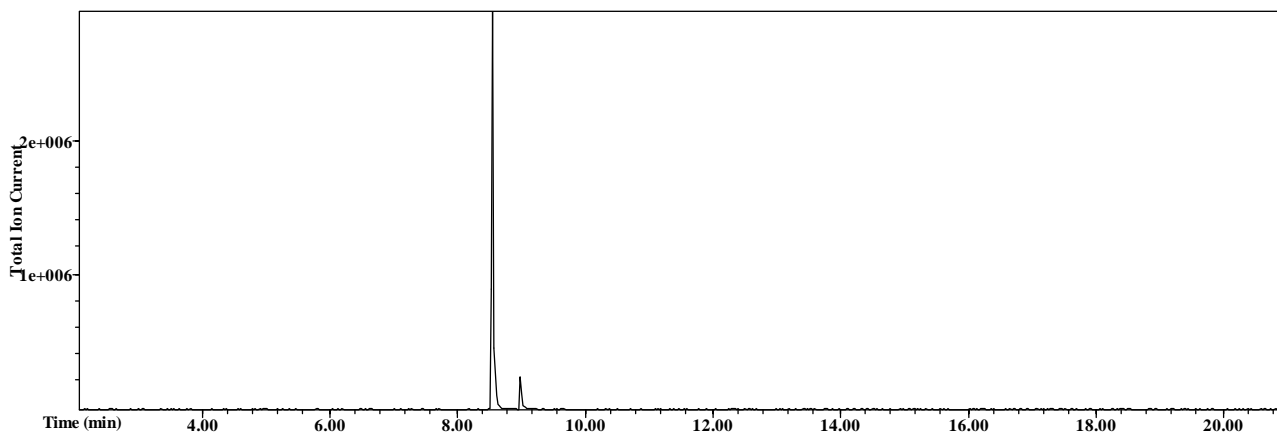

Acquired : 18 Dec 107 10:58 am using AcqMethod ANDHIGH

---

| Retention Time | Area | Area % | Ratio % |
|----------------|------|--------|---------|
|----------------|------|--------|---------|

---

#### Total Ion Chromatogram

|       |          |        |         |
|-------|----------|--------|---------|
| 8.572 | 61622756 | 92.041 | 100.000 |
| 9.010 | 5328961  | 7.959  | 8.648   |

---

#### Major Diastereoisomer

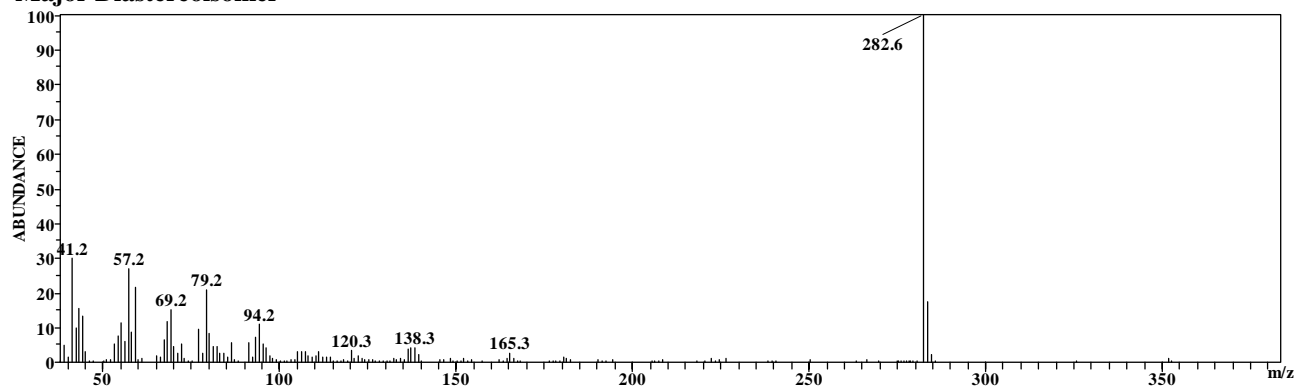

#### Minor Diastereoisomer

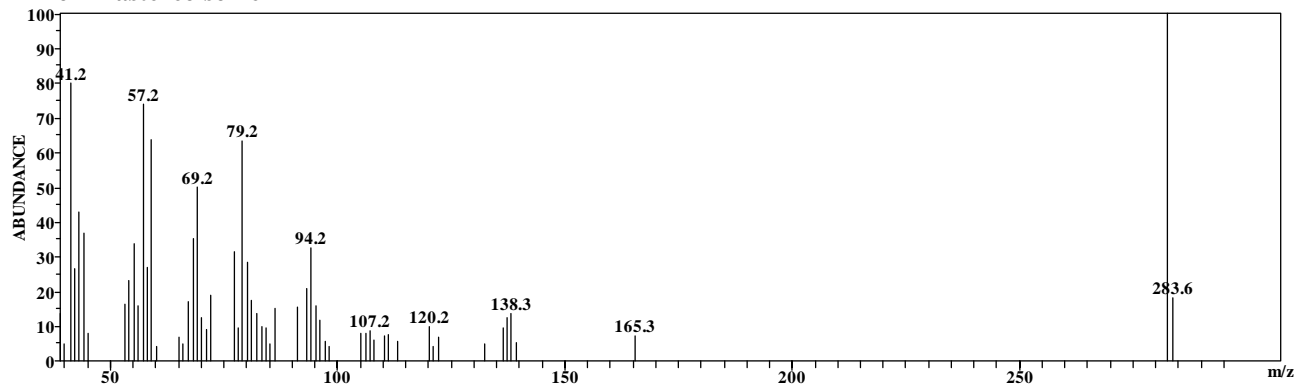

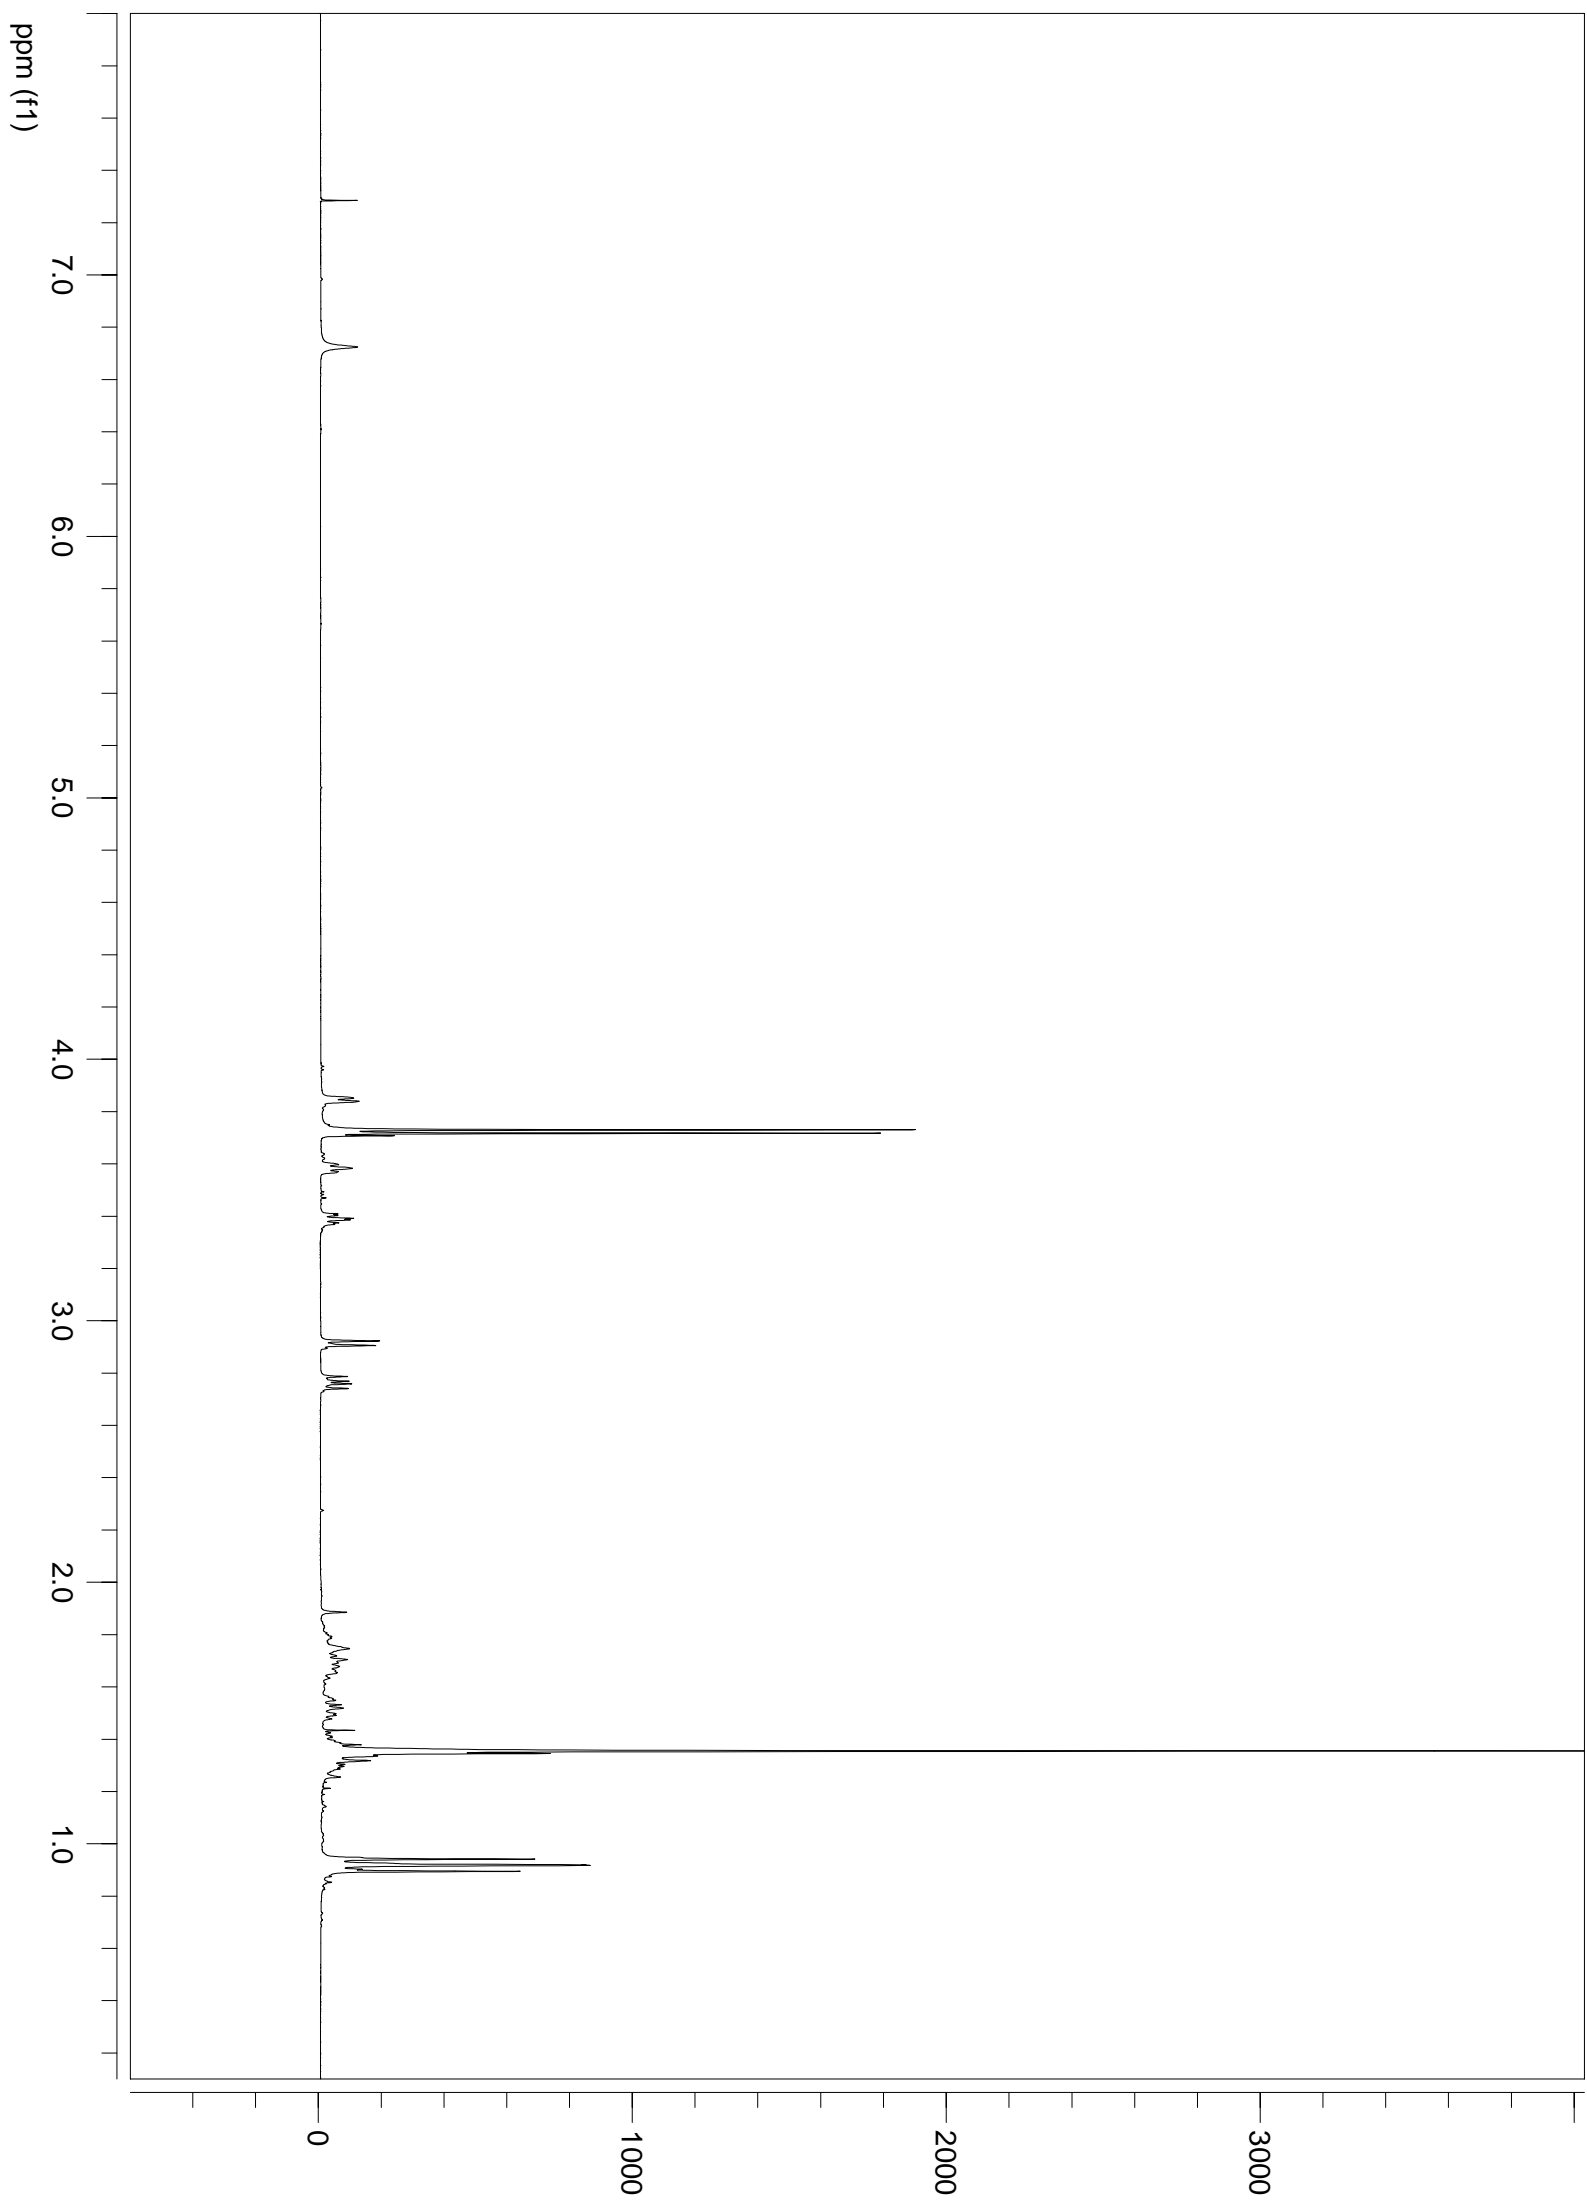



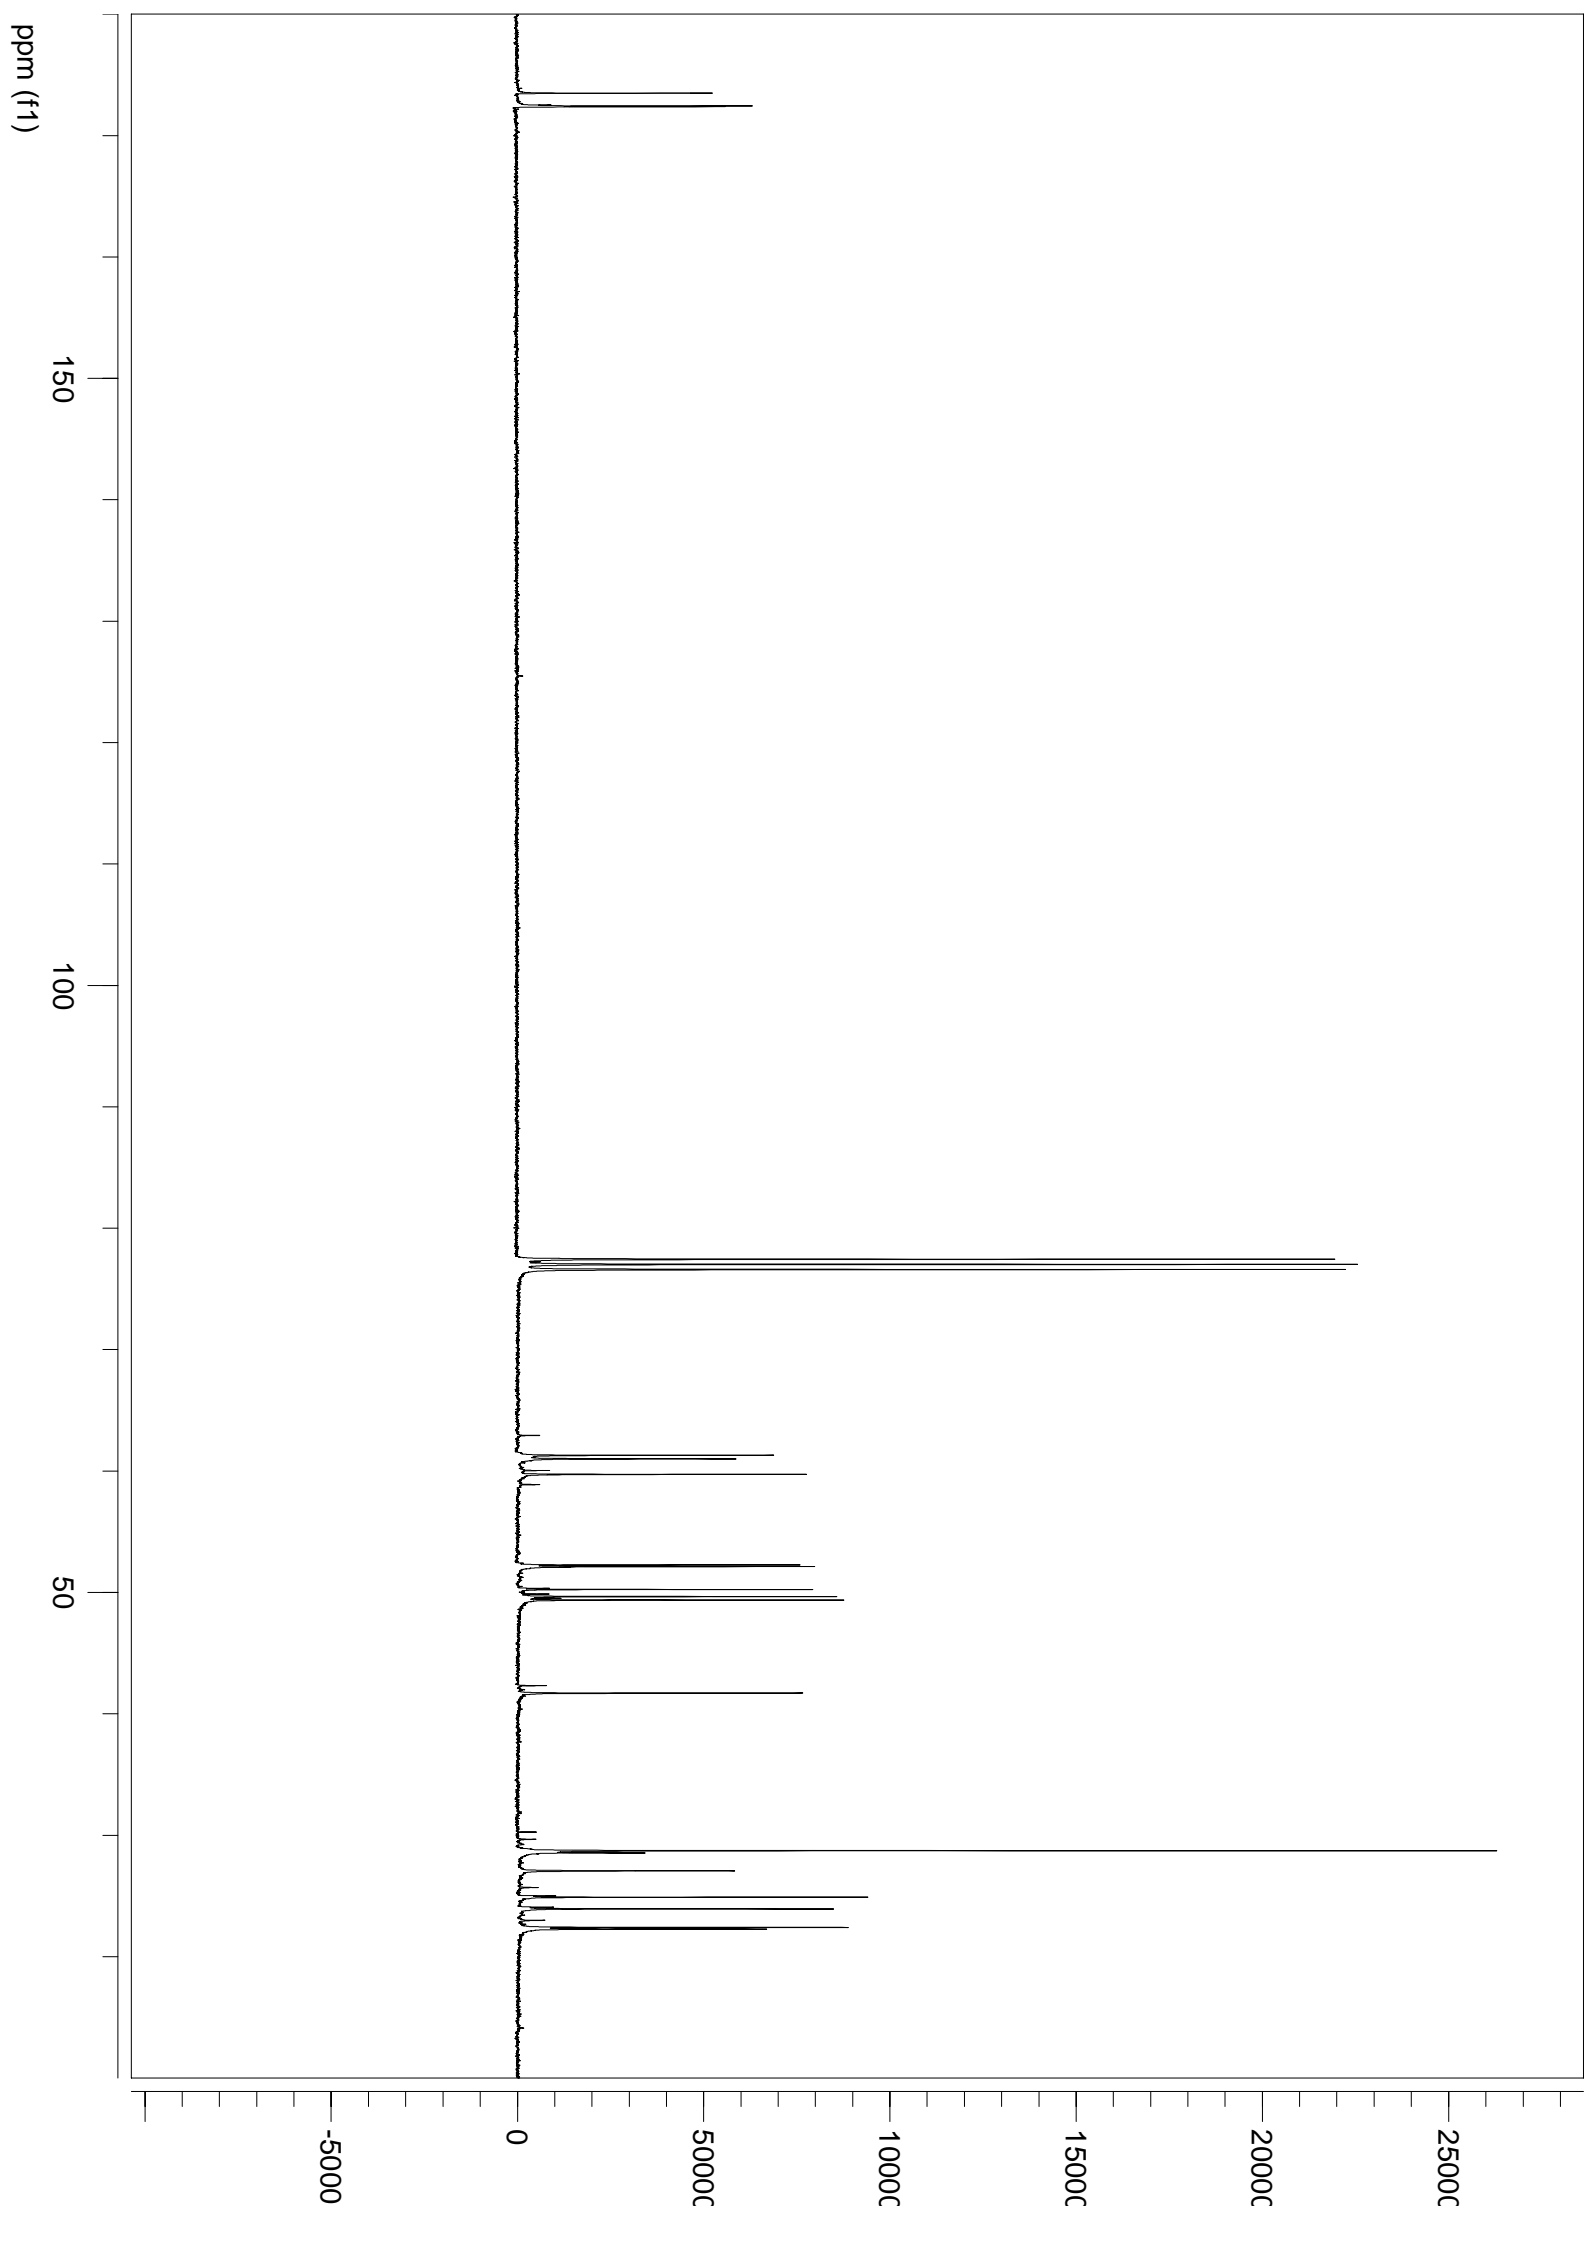

# Compound 13c

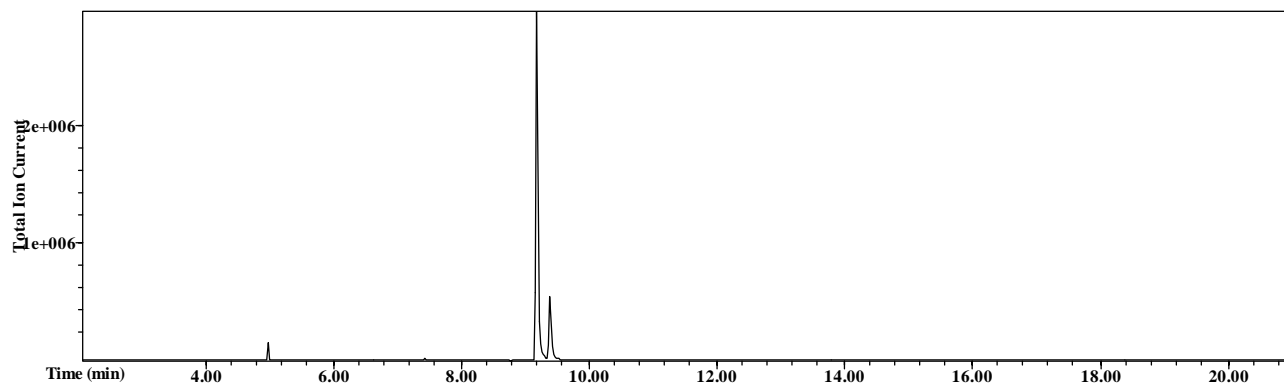

Acquired : 19 Dec 107 4:23 pm using AcqMethod ANDHIGH

---

| Retention Time | Area | Area % | Ratio % |
|----------------|------|--------|---------|
|----------------|------|--------|---------|

---

### Total Ion Chromatogram

|       |          |        |         |
|-------|----------|--------|---------|
| 4.983 | 2090787  | 4.055  | 5.741   |
| 9.196 | 36418309 | 70.626 | 100.000 |
| 9.410 | 13056070 | 25.320 | 35.850  |

---

### Major Diastereoisomer

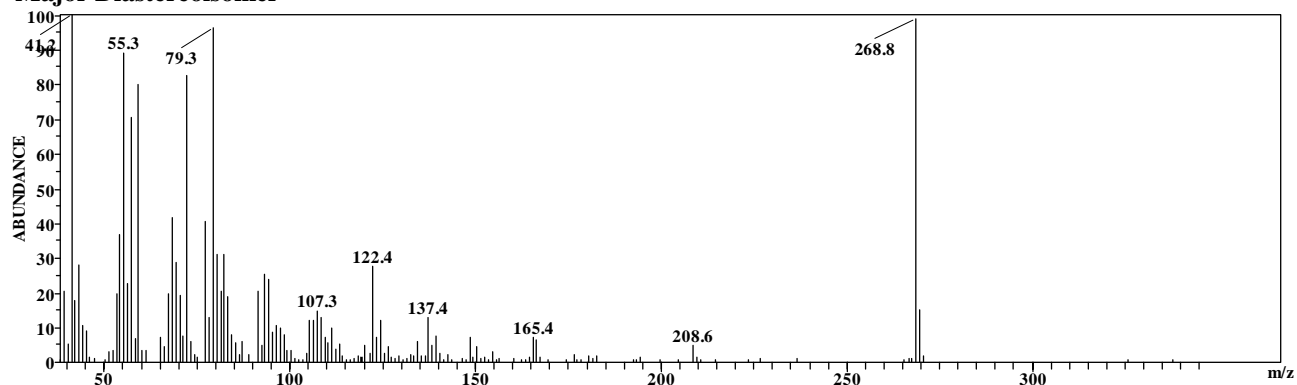

### Minor Diastereoisomer

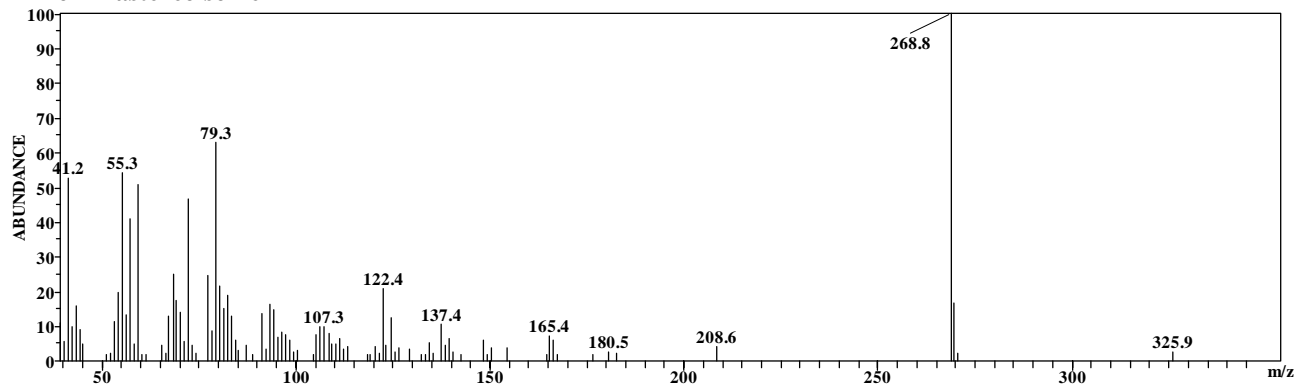

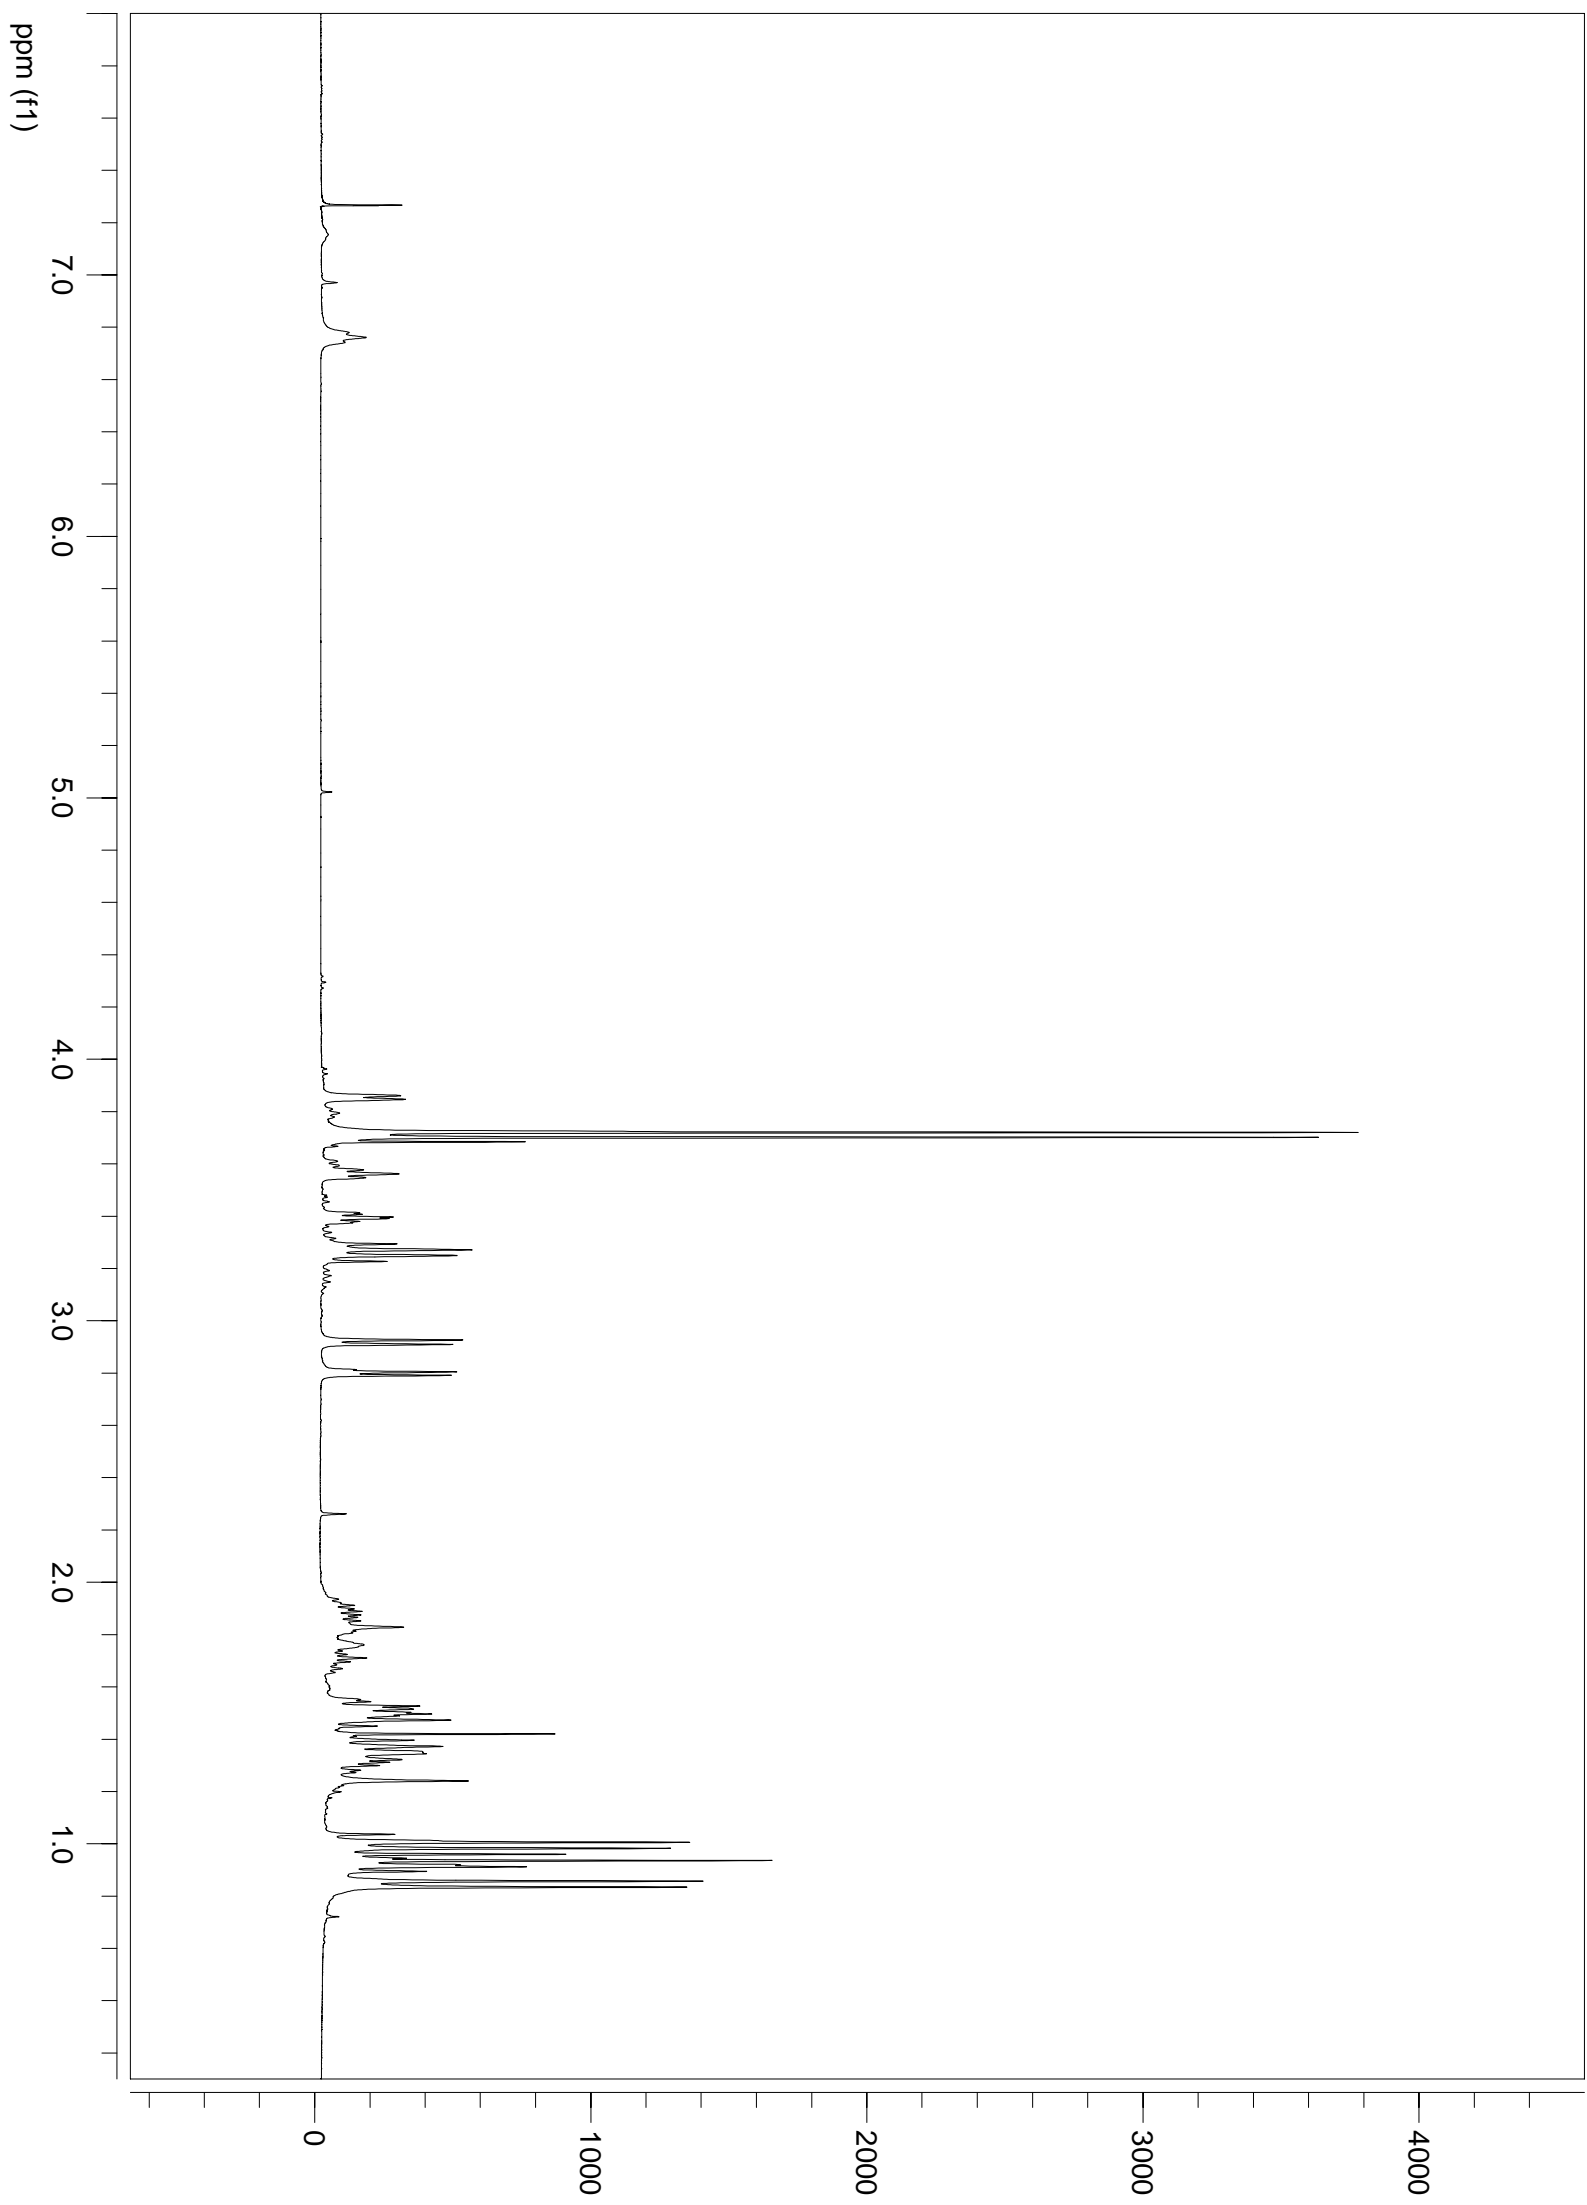

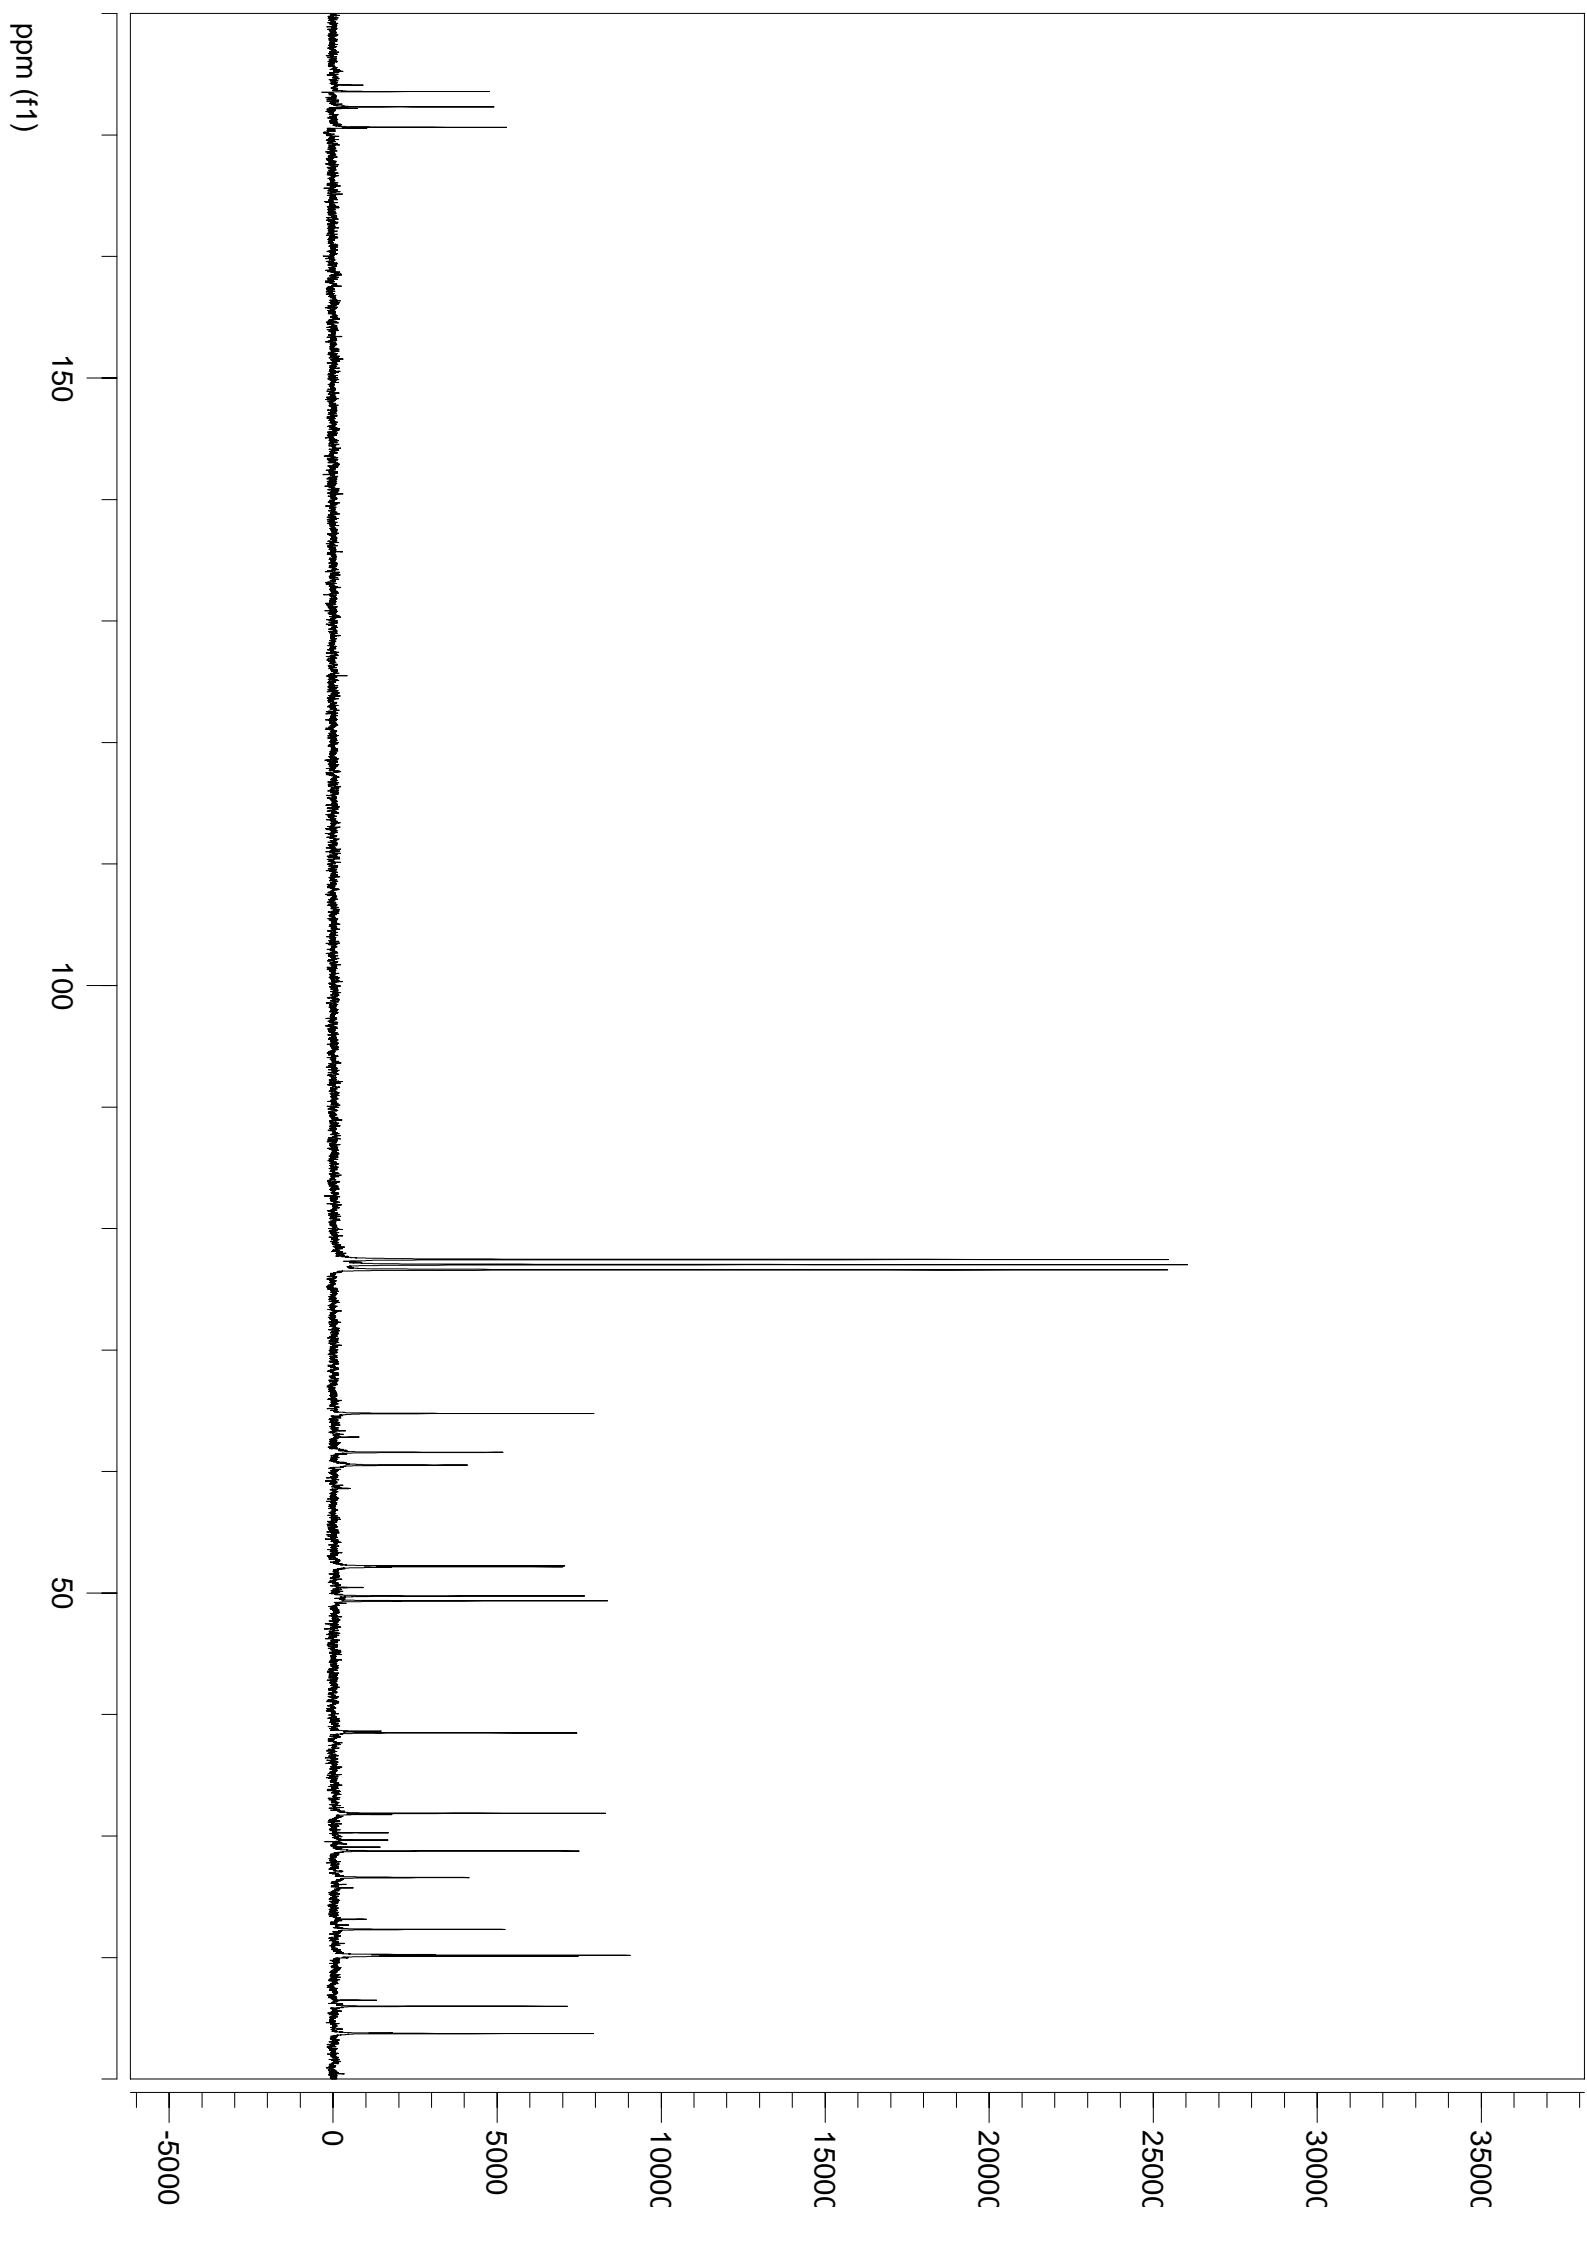

### Compound 13d

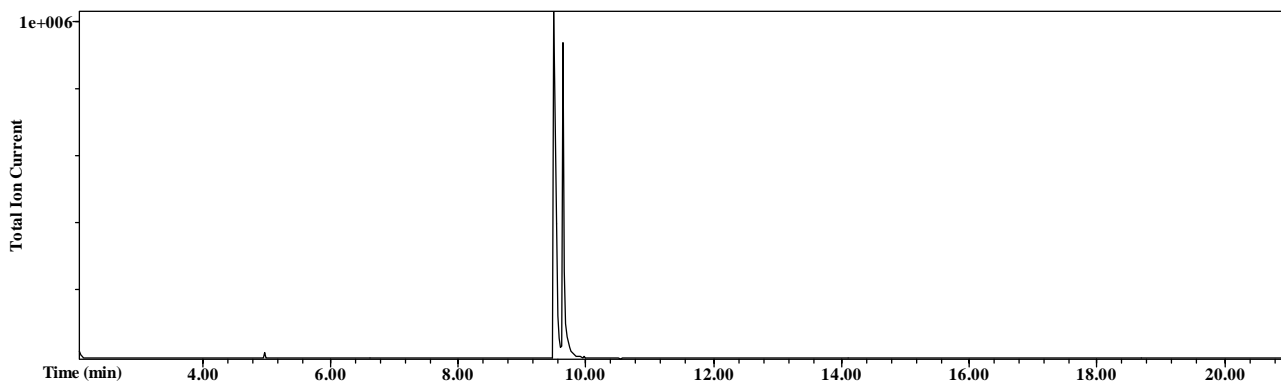

Acquired : 19 Dec 107 12:24 pm using AcqMethod ANDHIGH

---

| Retention Time | Area | Area % | Ratio % |
|----------------|------|--------|---------|
|----------------|------|--------|---------|

---

#### Total Ion Chromatogram

|       |          |        |         |
|-------|----------|--------|---------|
| 9.527 | 22398886 | 51.420 | 100.000 |
| 9.663 | 21161683 | 48.580 | 94.477  |

---

### Major Diastereoisomer

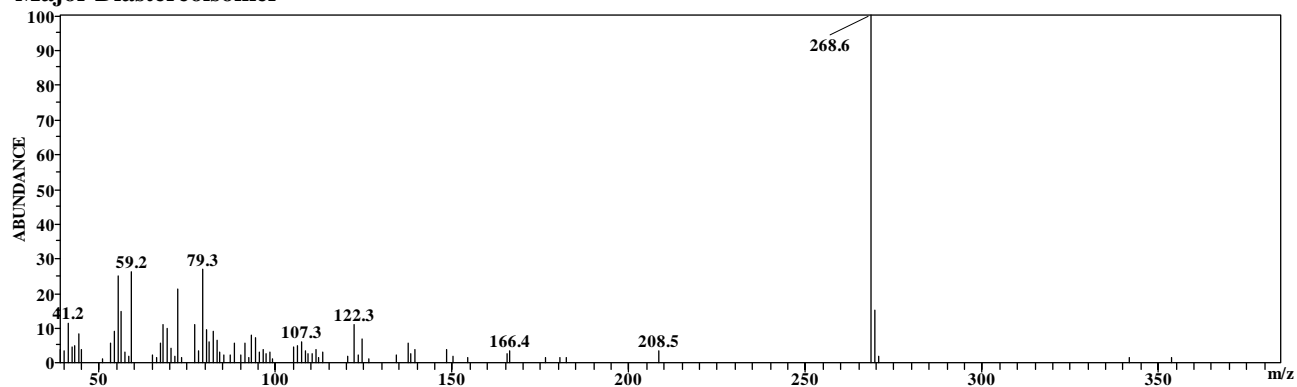

### Minor Diastereoisomer

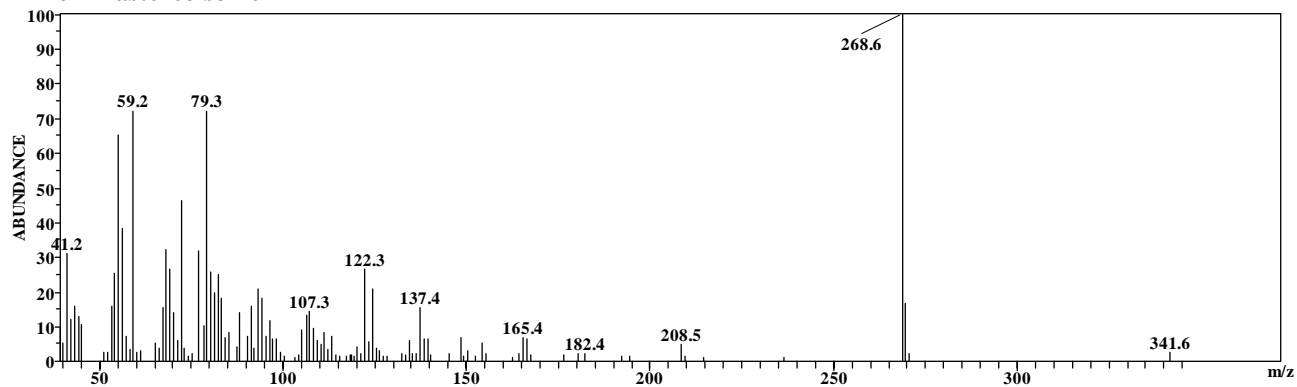

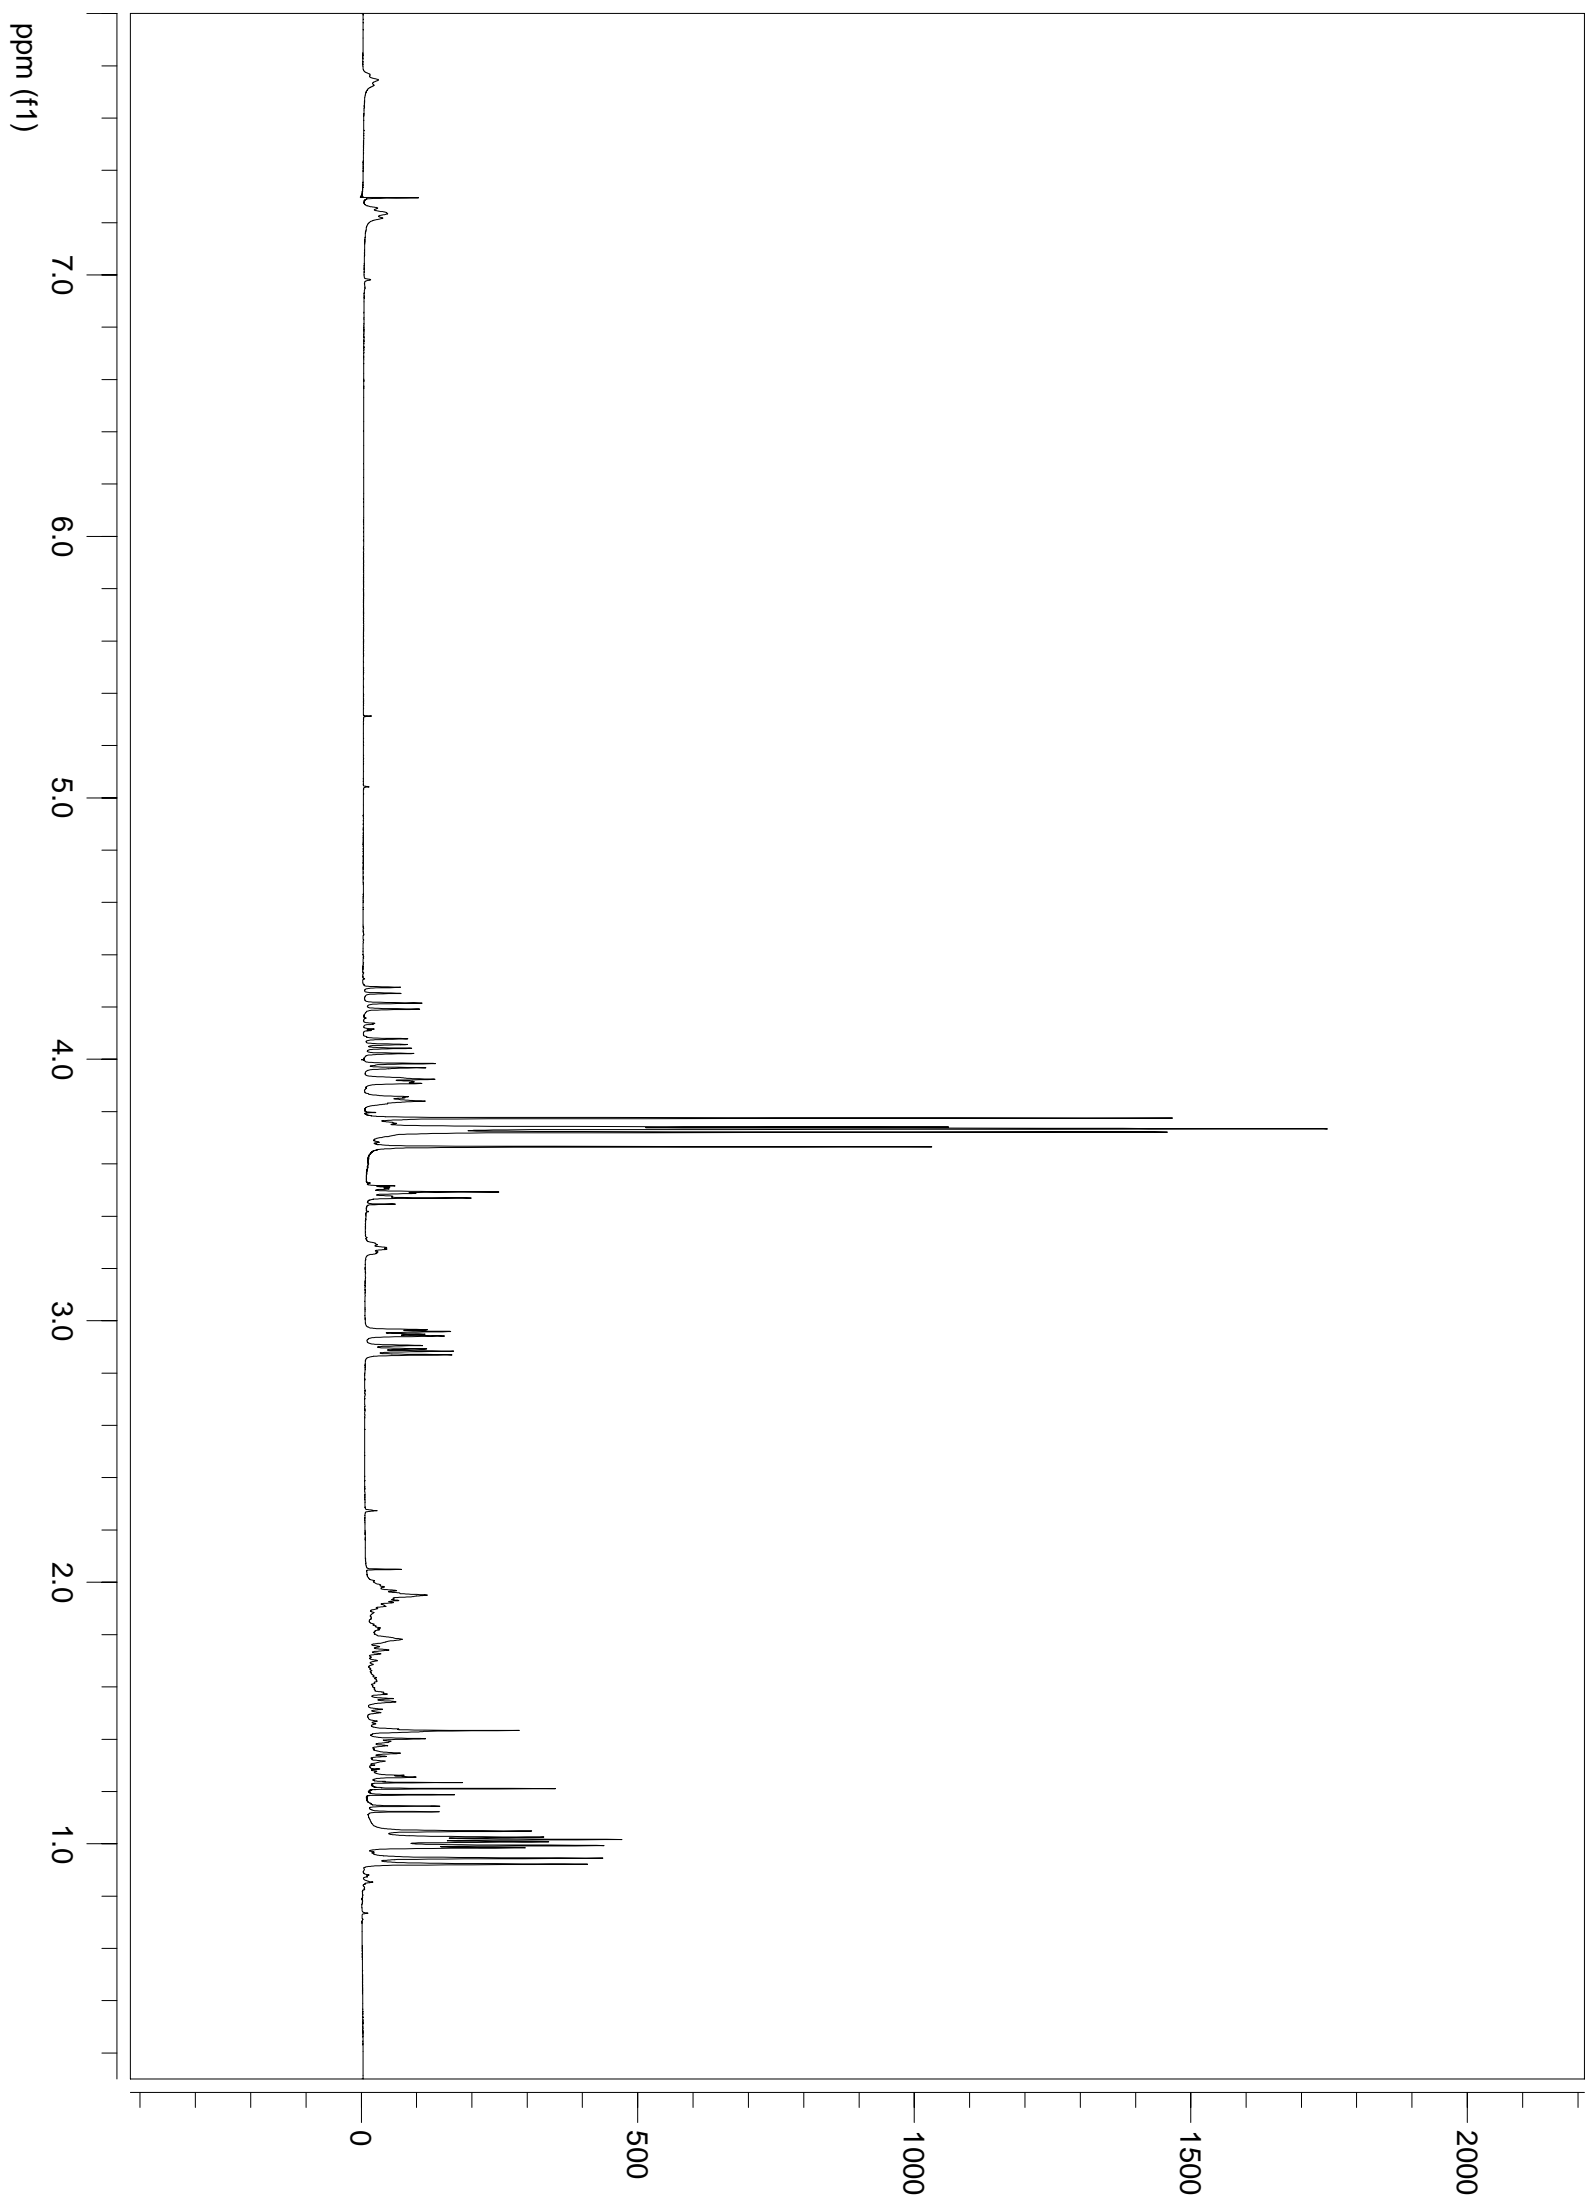

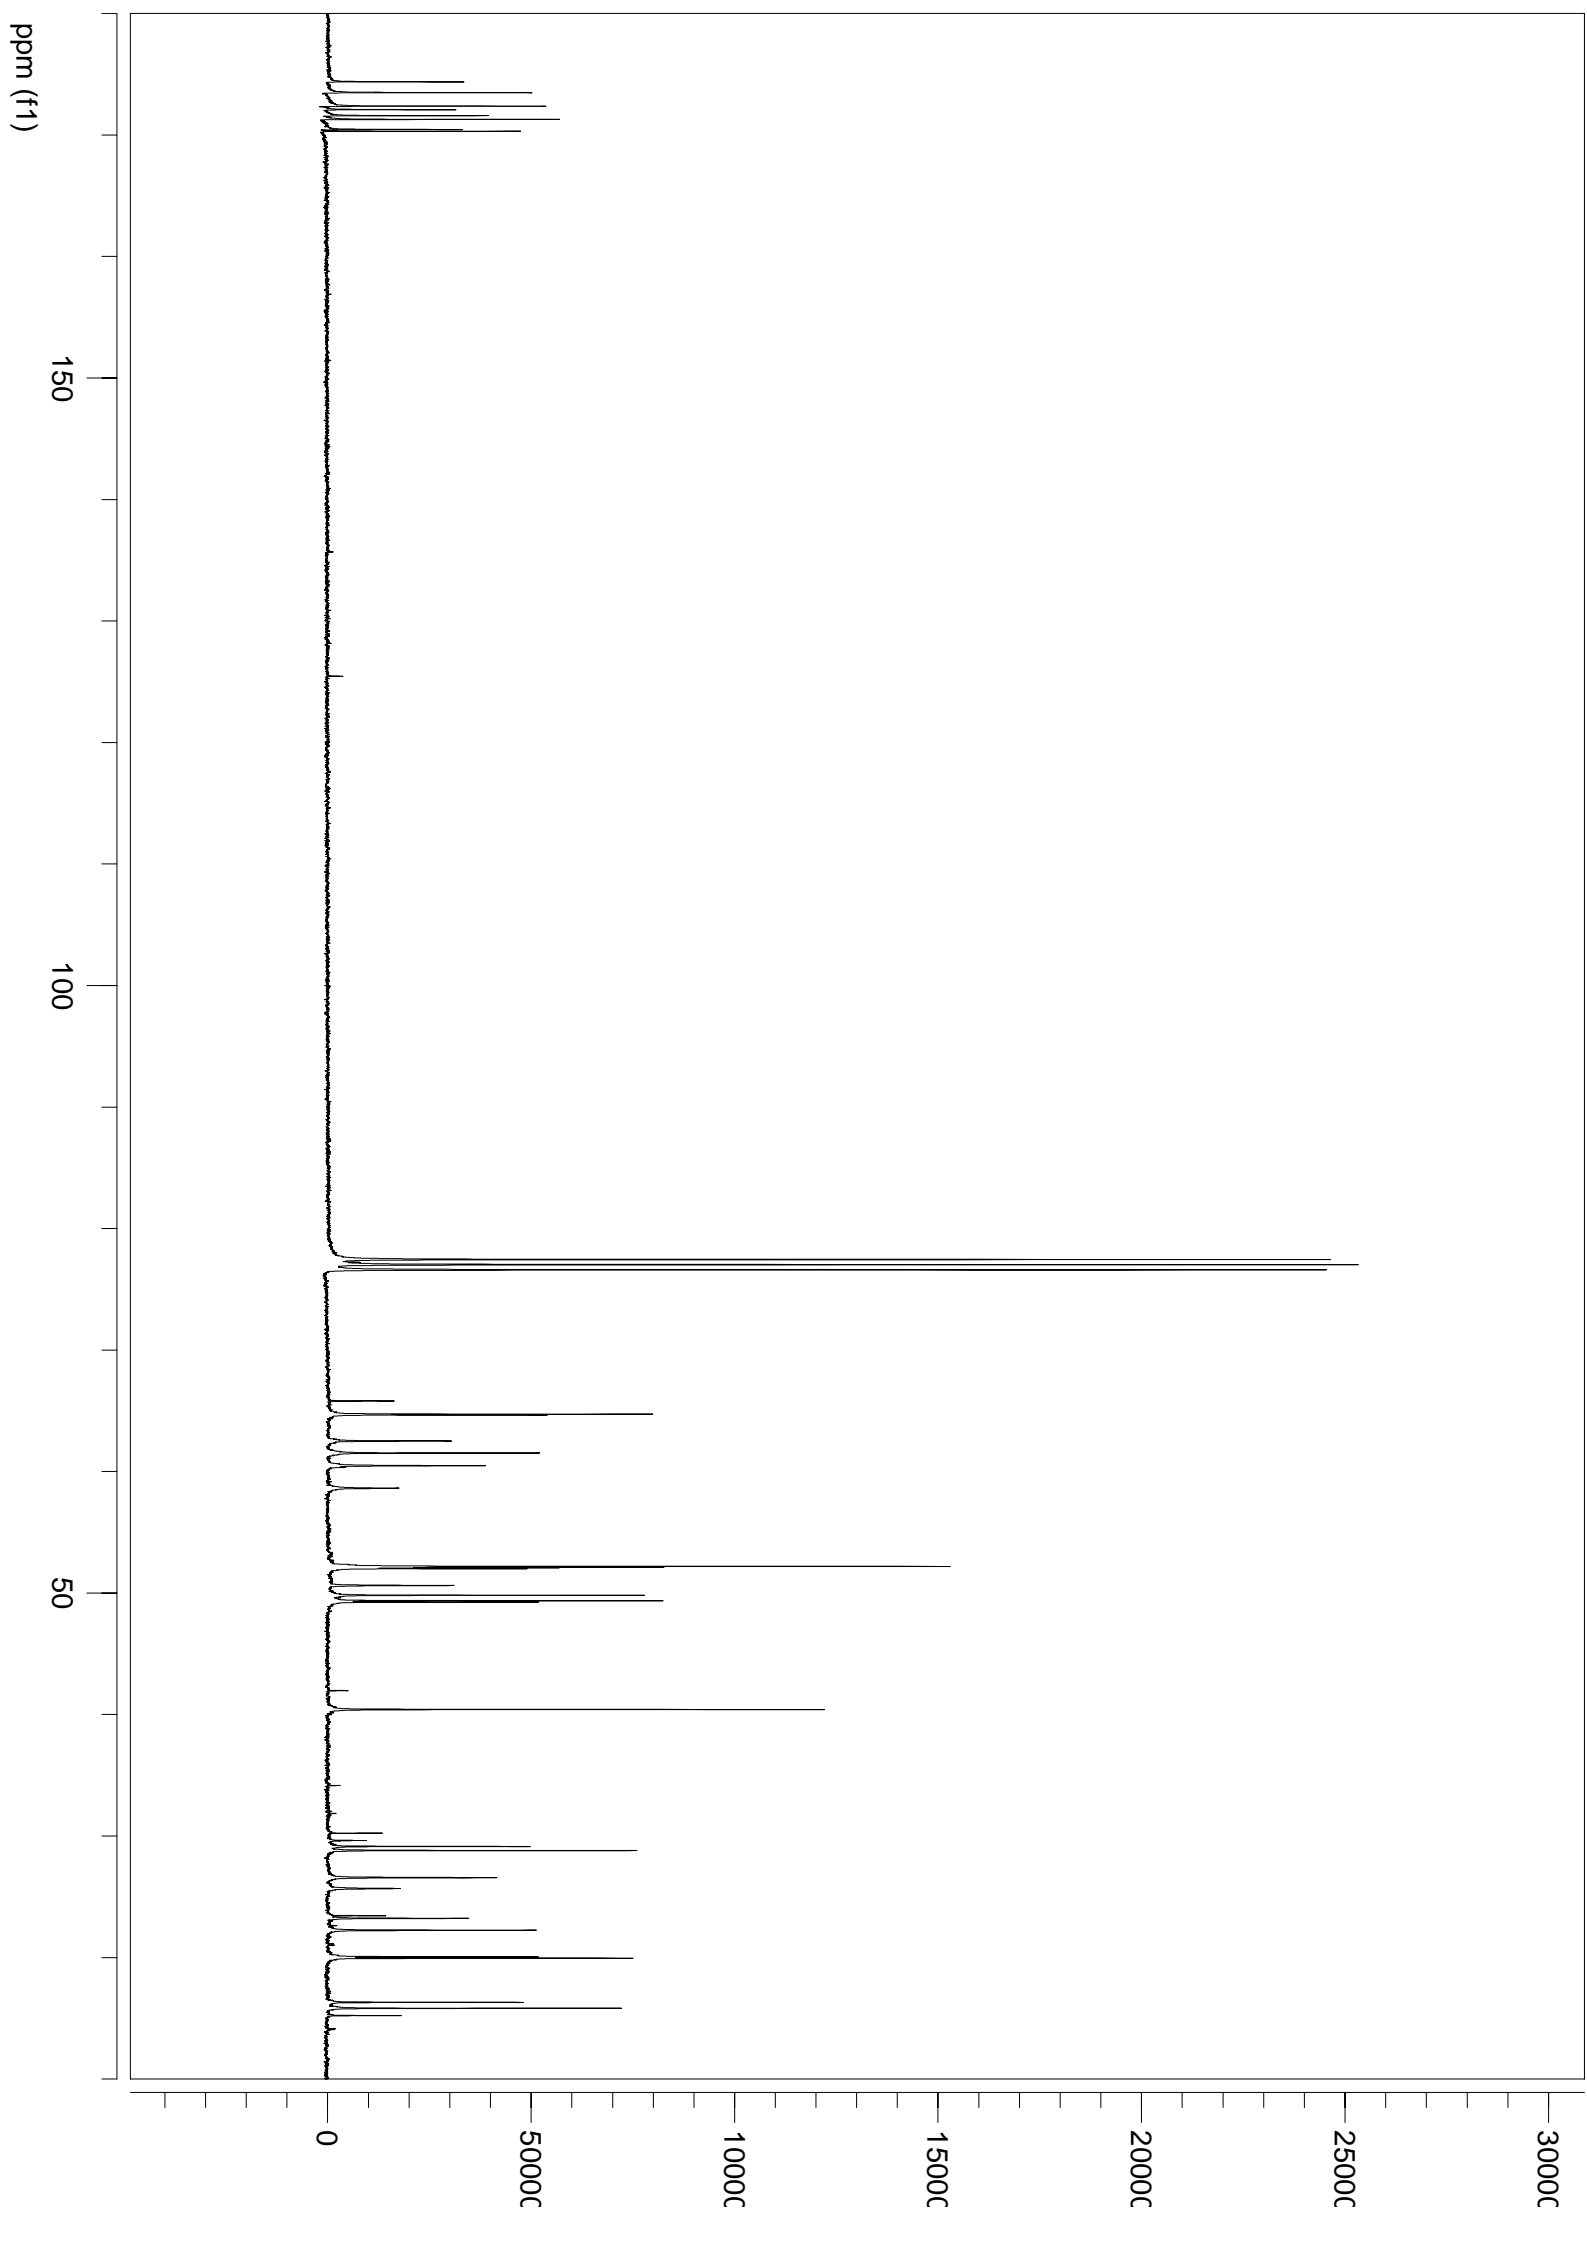

### Compound 13e

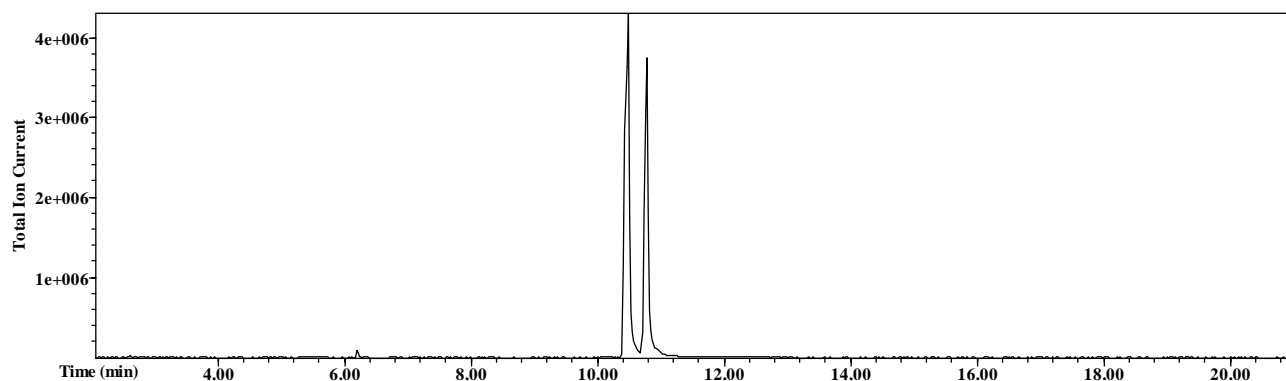

Acquired : 20 Dec 107 6:17 pm using AcqMethod ANDHIGH

---

| Retention Time | Area | Area % | Ratio % |
|----------------|------|--------|---------|
|----------------|------|--------|---------|

---

#### Total Ion Chromatogram

|        |           |        |         |
|--------|-----------|--------|---------|
| 6.228  | 2174000   | 0.559  | 1.037   |
| 10.512 | 209561935 | 53.912 | 100.000 |
| 10.810 | 176977708 | 45.529 | 84.451  |

---

#### Major Diastereoisomer

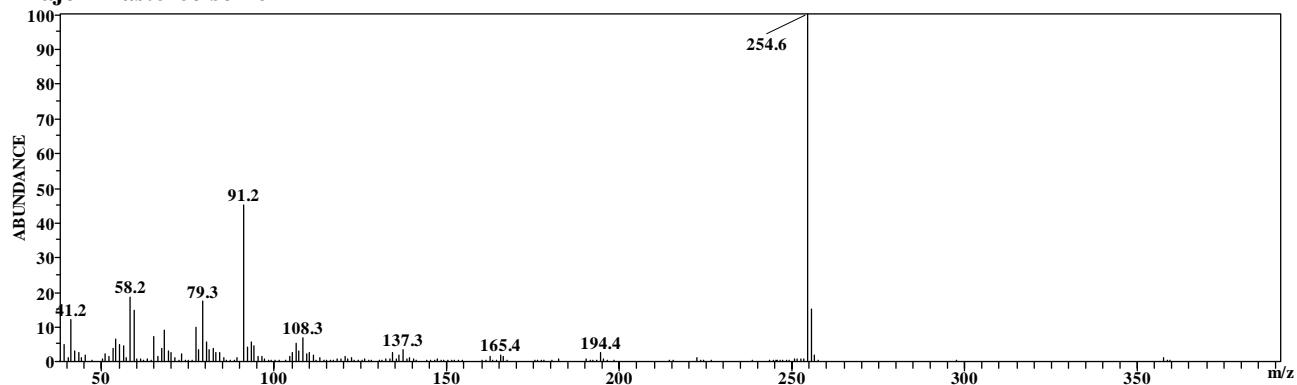

#### Minor Diastereoisomer

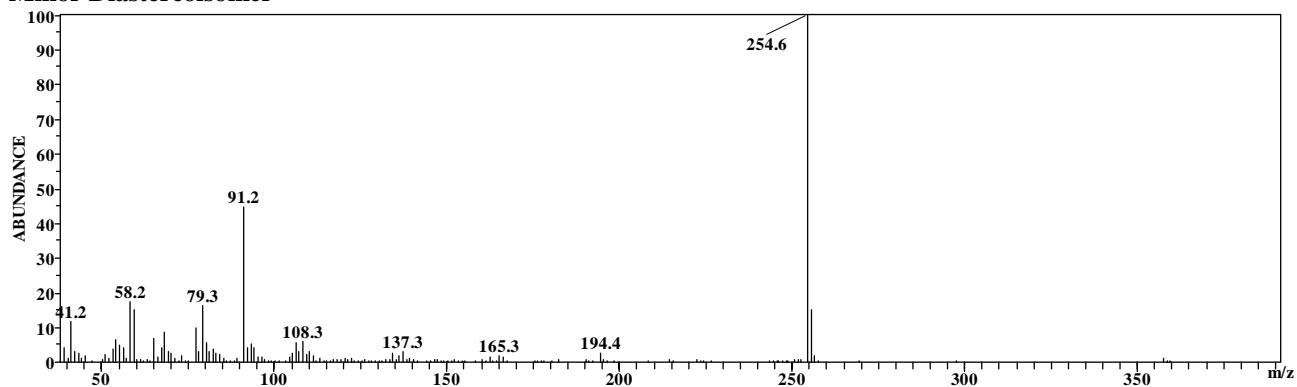



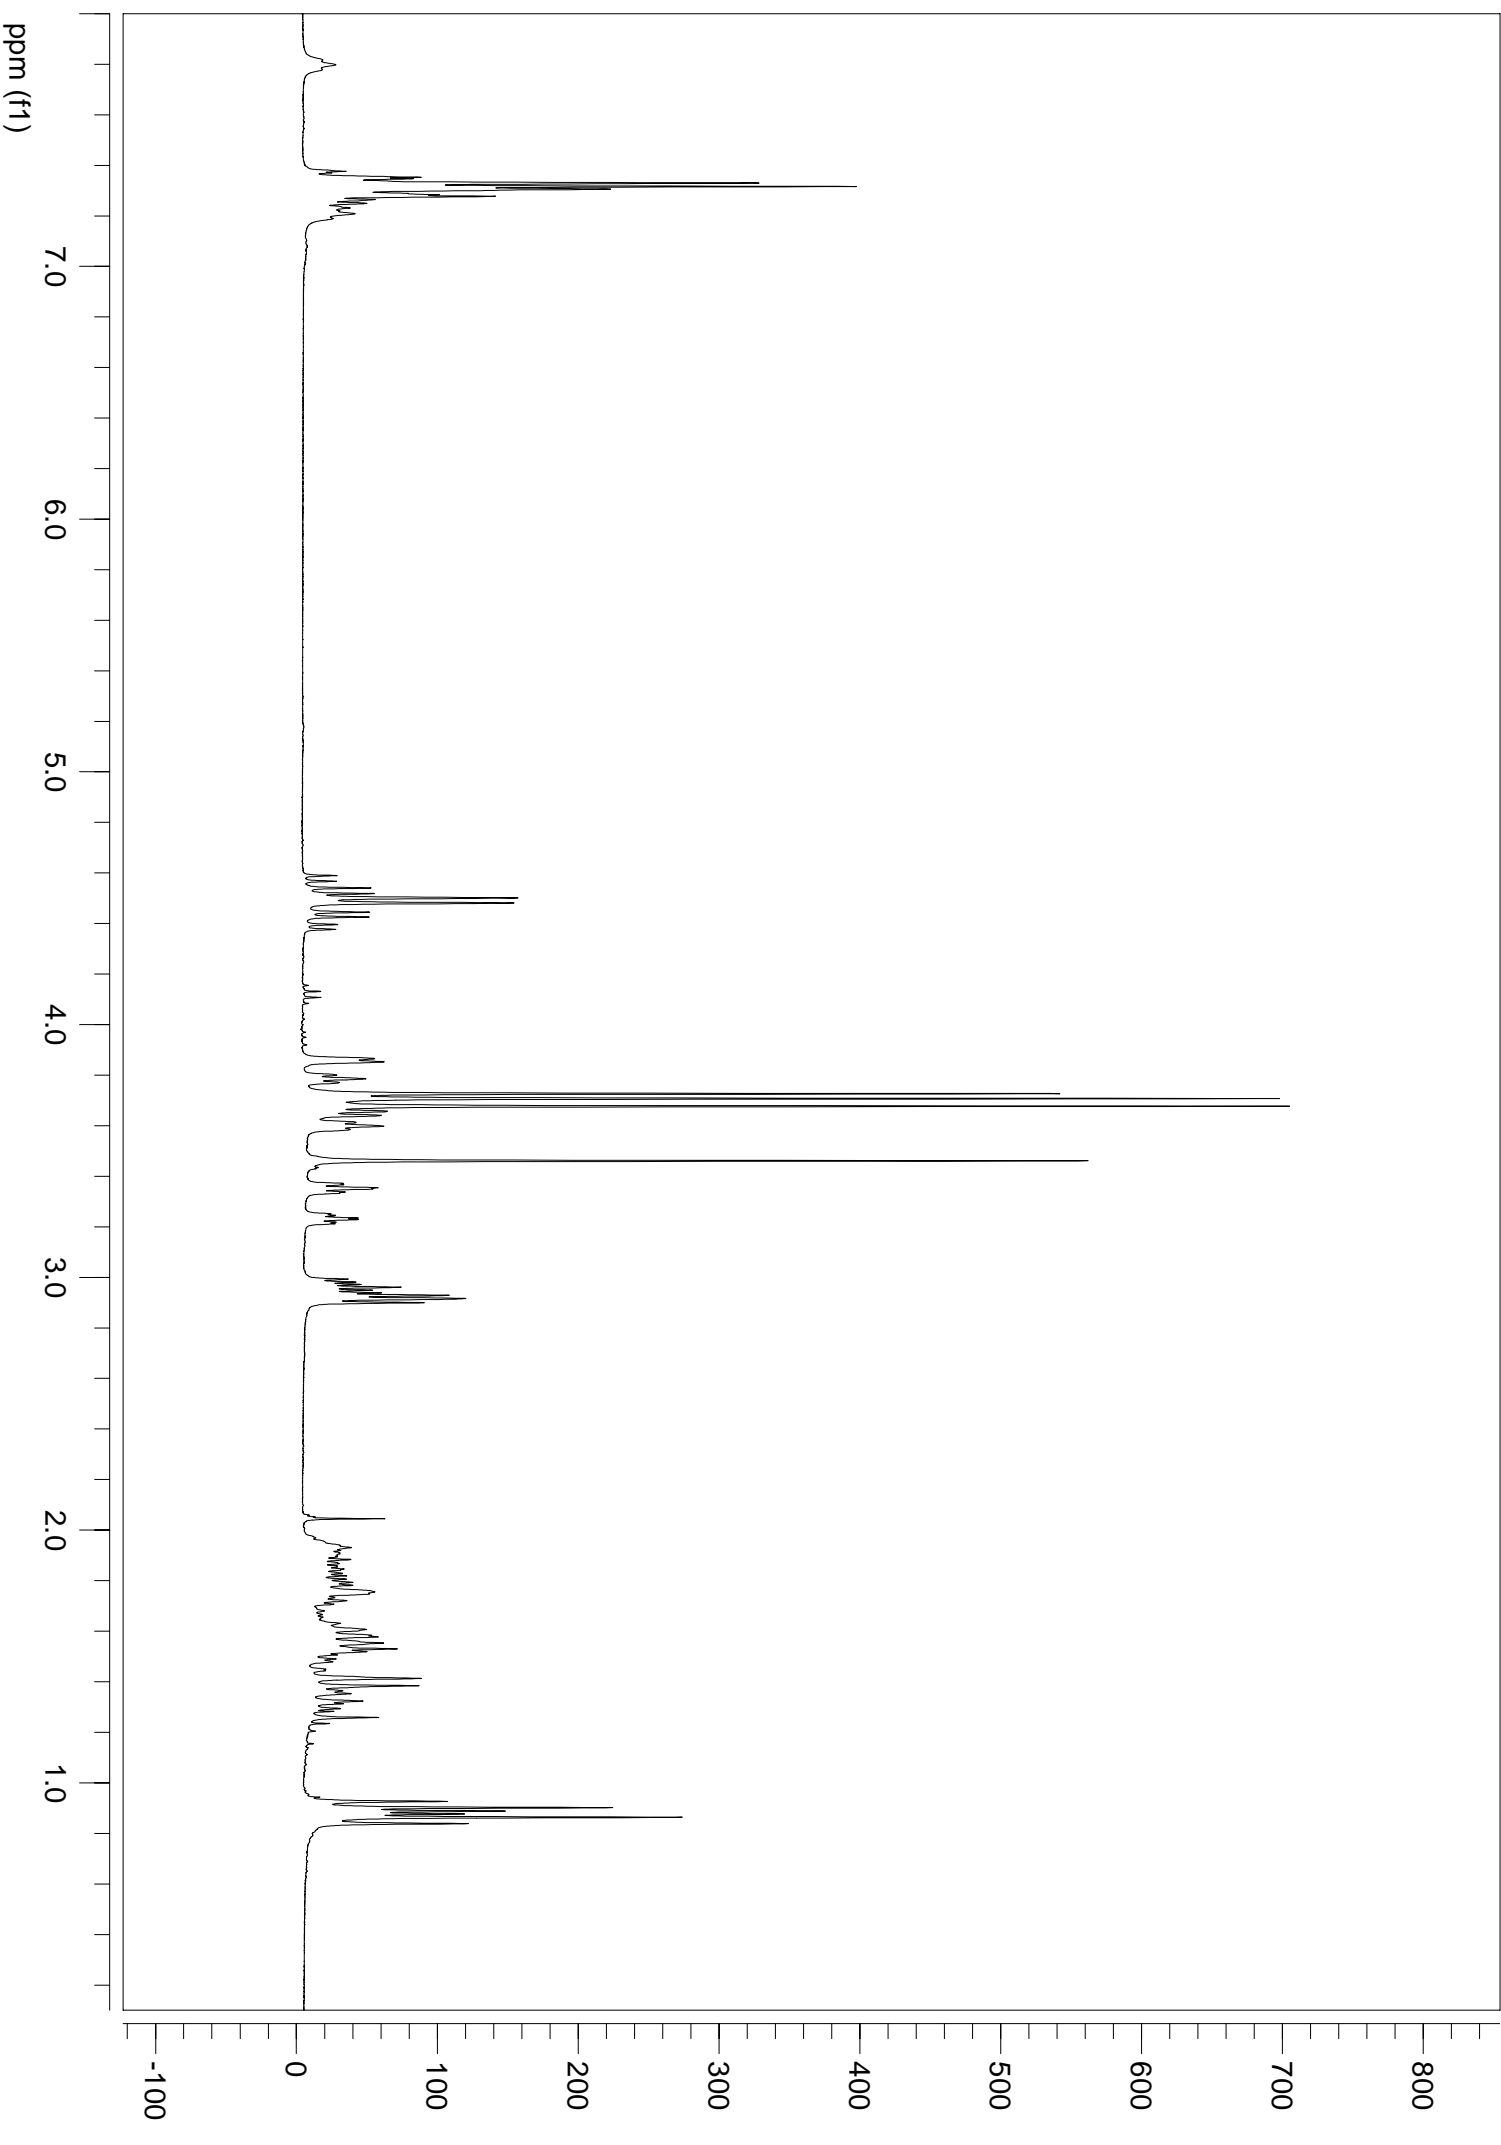

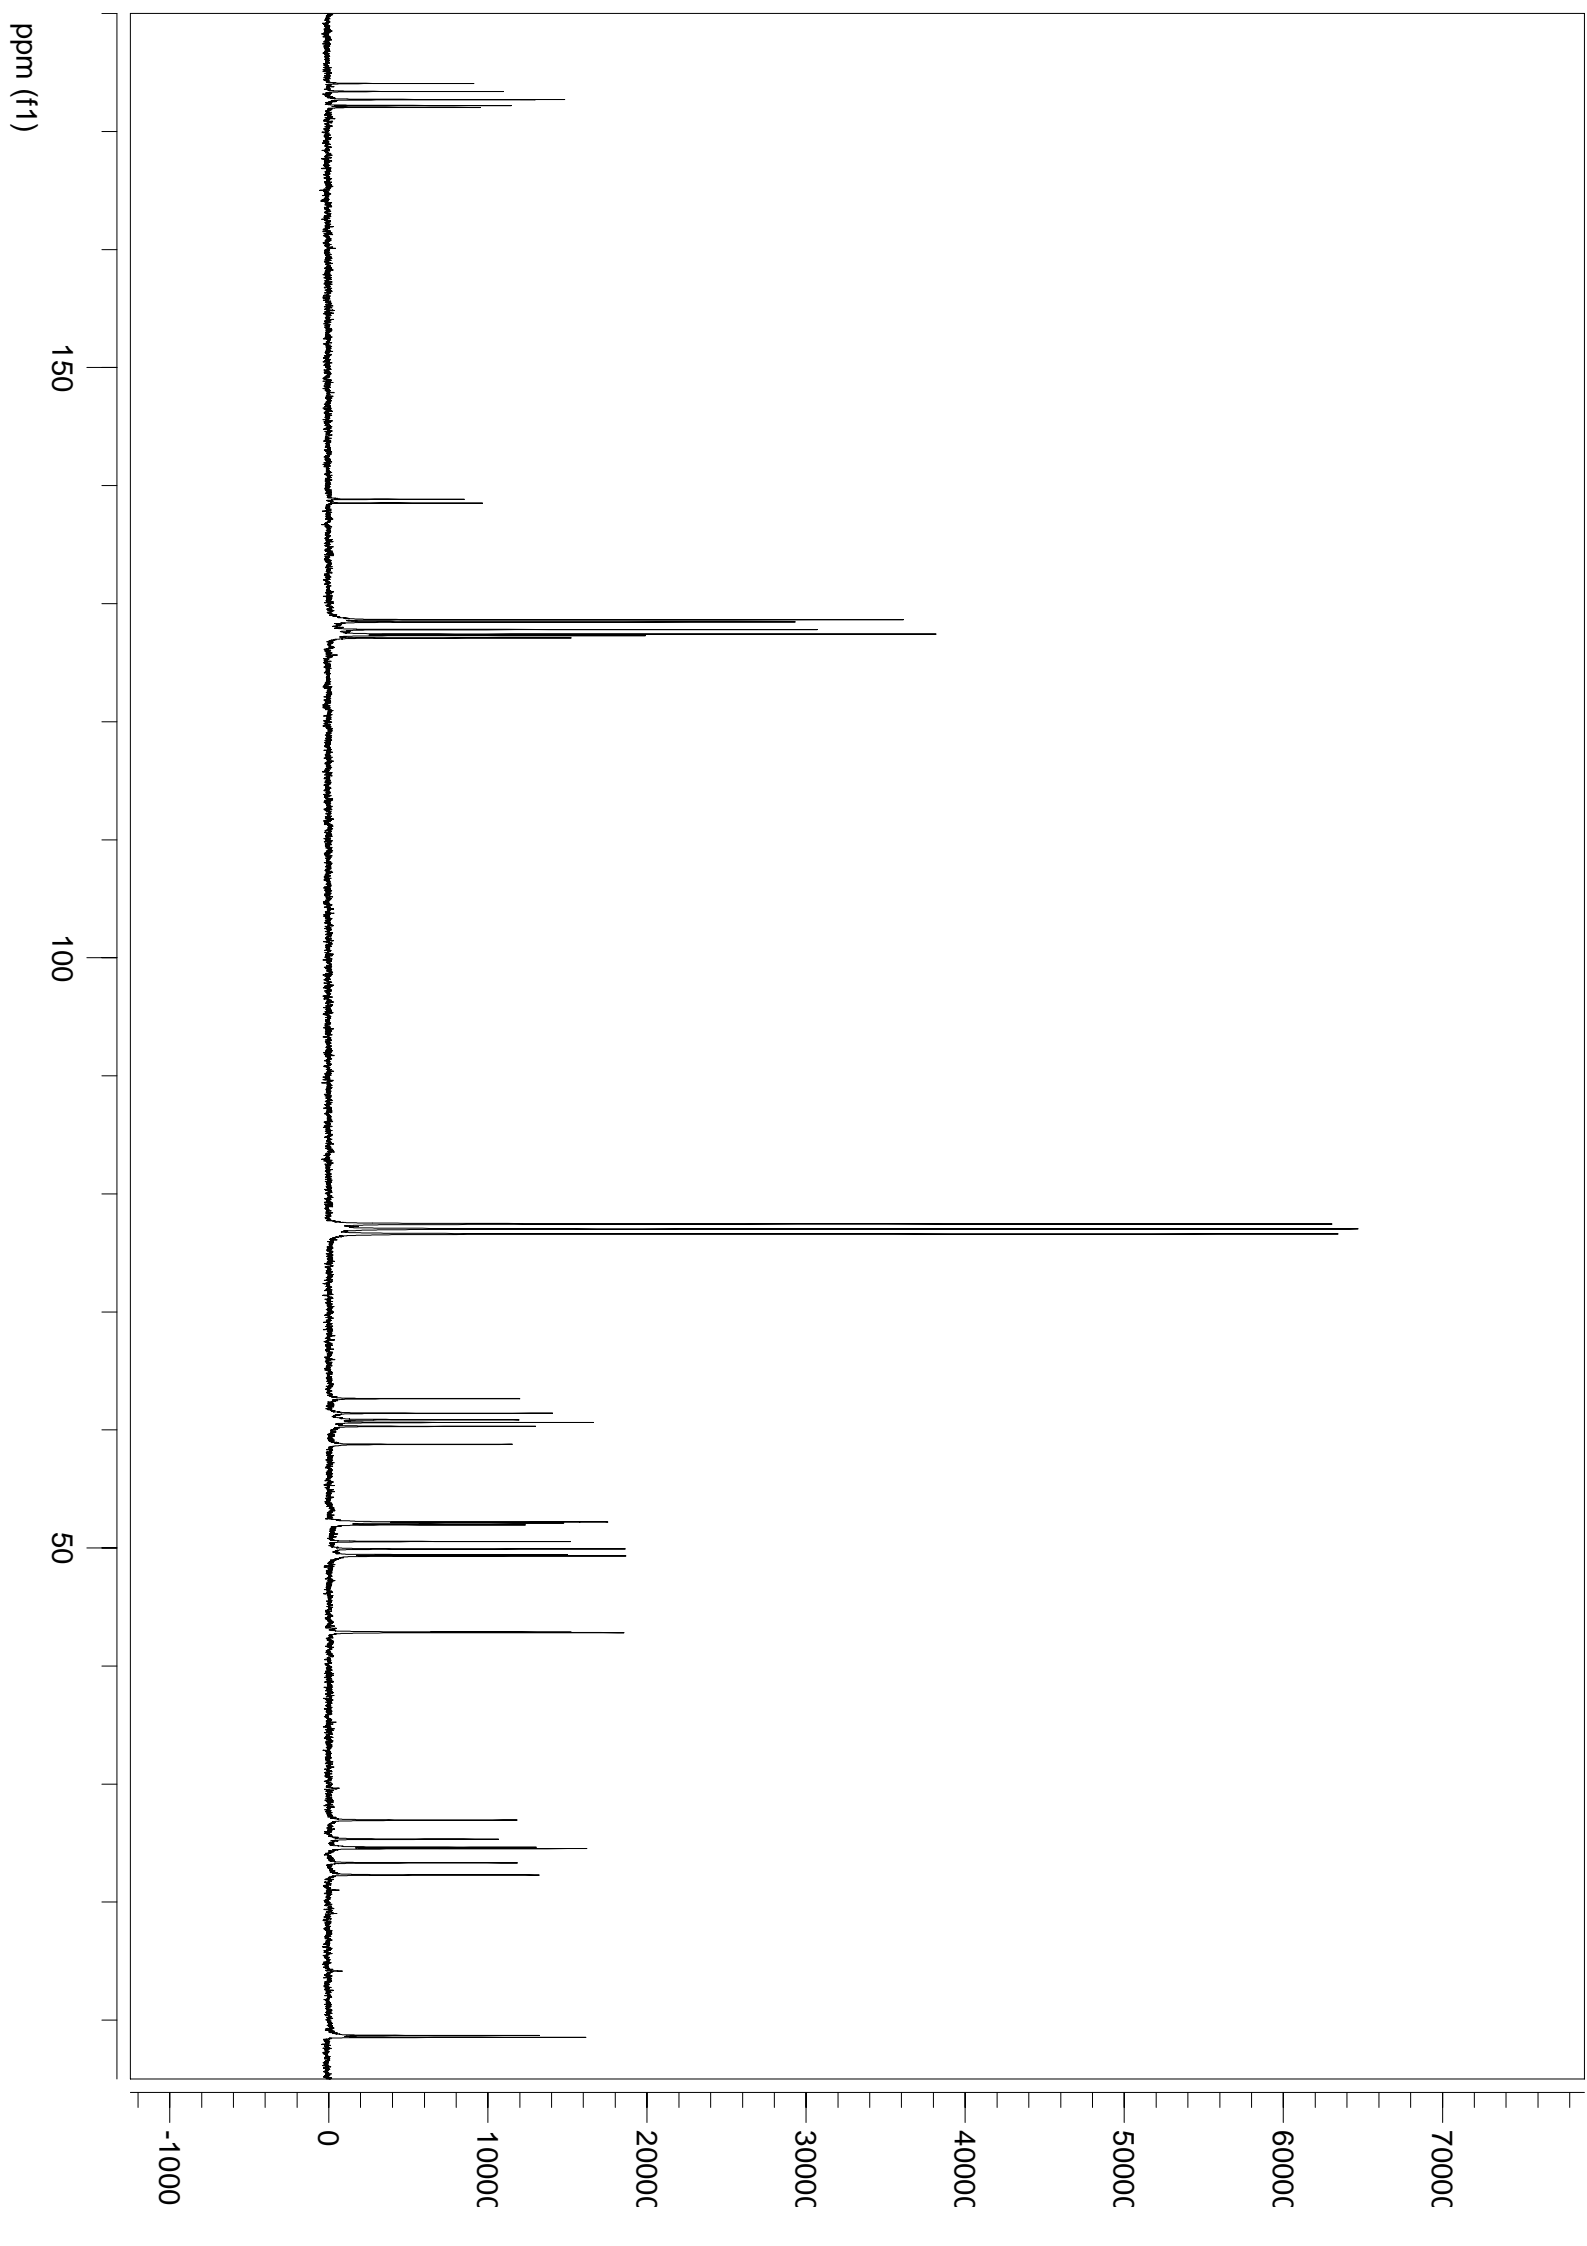

### Compound 13f

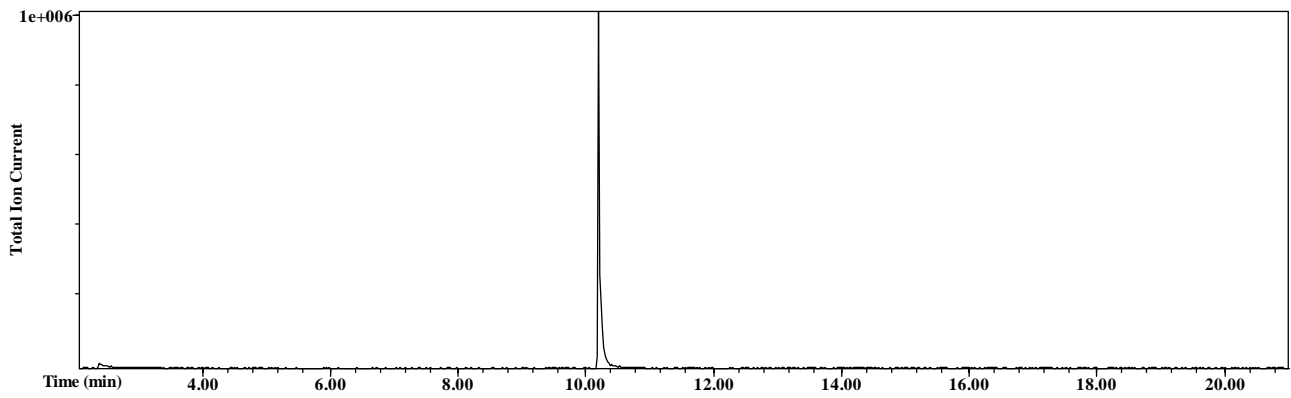

Acquired : 18 Dec 107 3:07 pm using AcqMethod ANDHIGH

---

| Retention Time | Area | Area % | Ratio % |
|----------------|------|--------|---------|
|----------------|------|--------|---------|

---

|                        |          |         |         |
|------------------------|----------|---------|---------|
| Total Ion Chromatogram |          |         |         |
| 10.238                 | 21650669 | 100.000 | 100.000 |

---

### Single Product

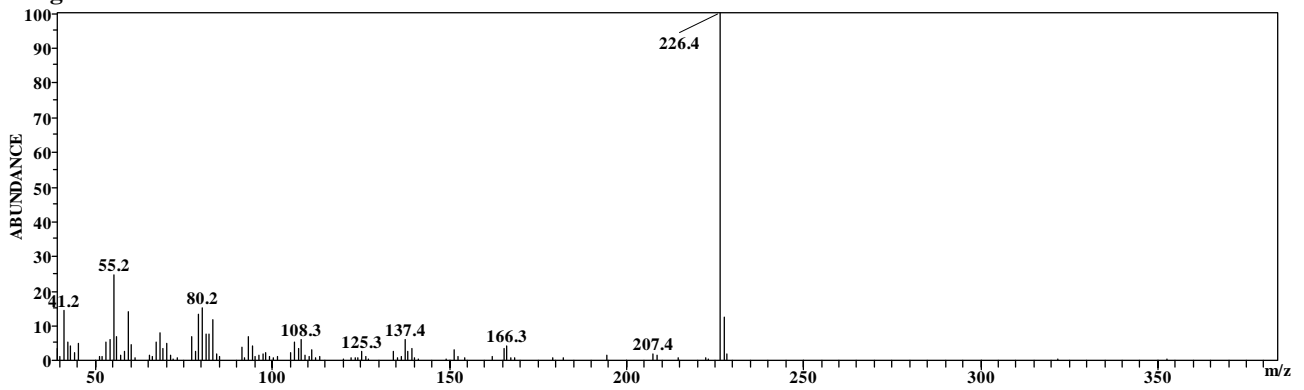

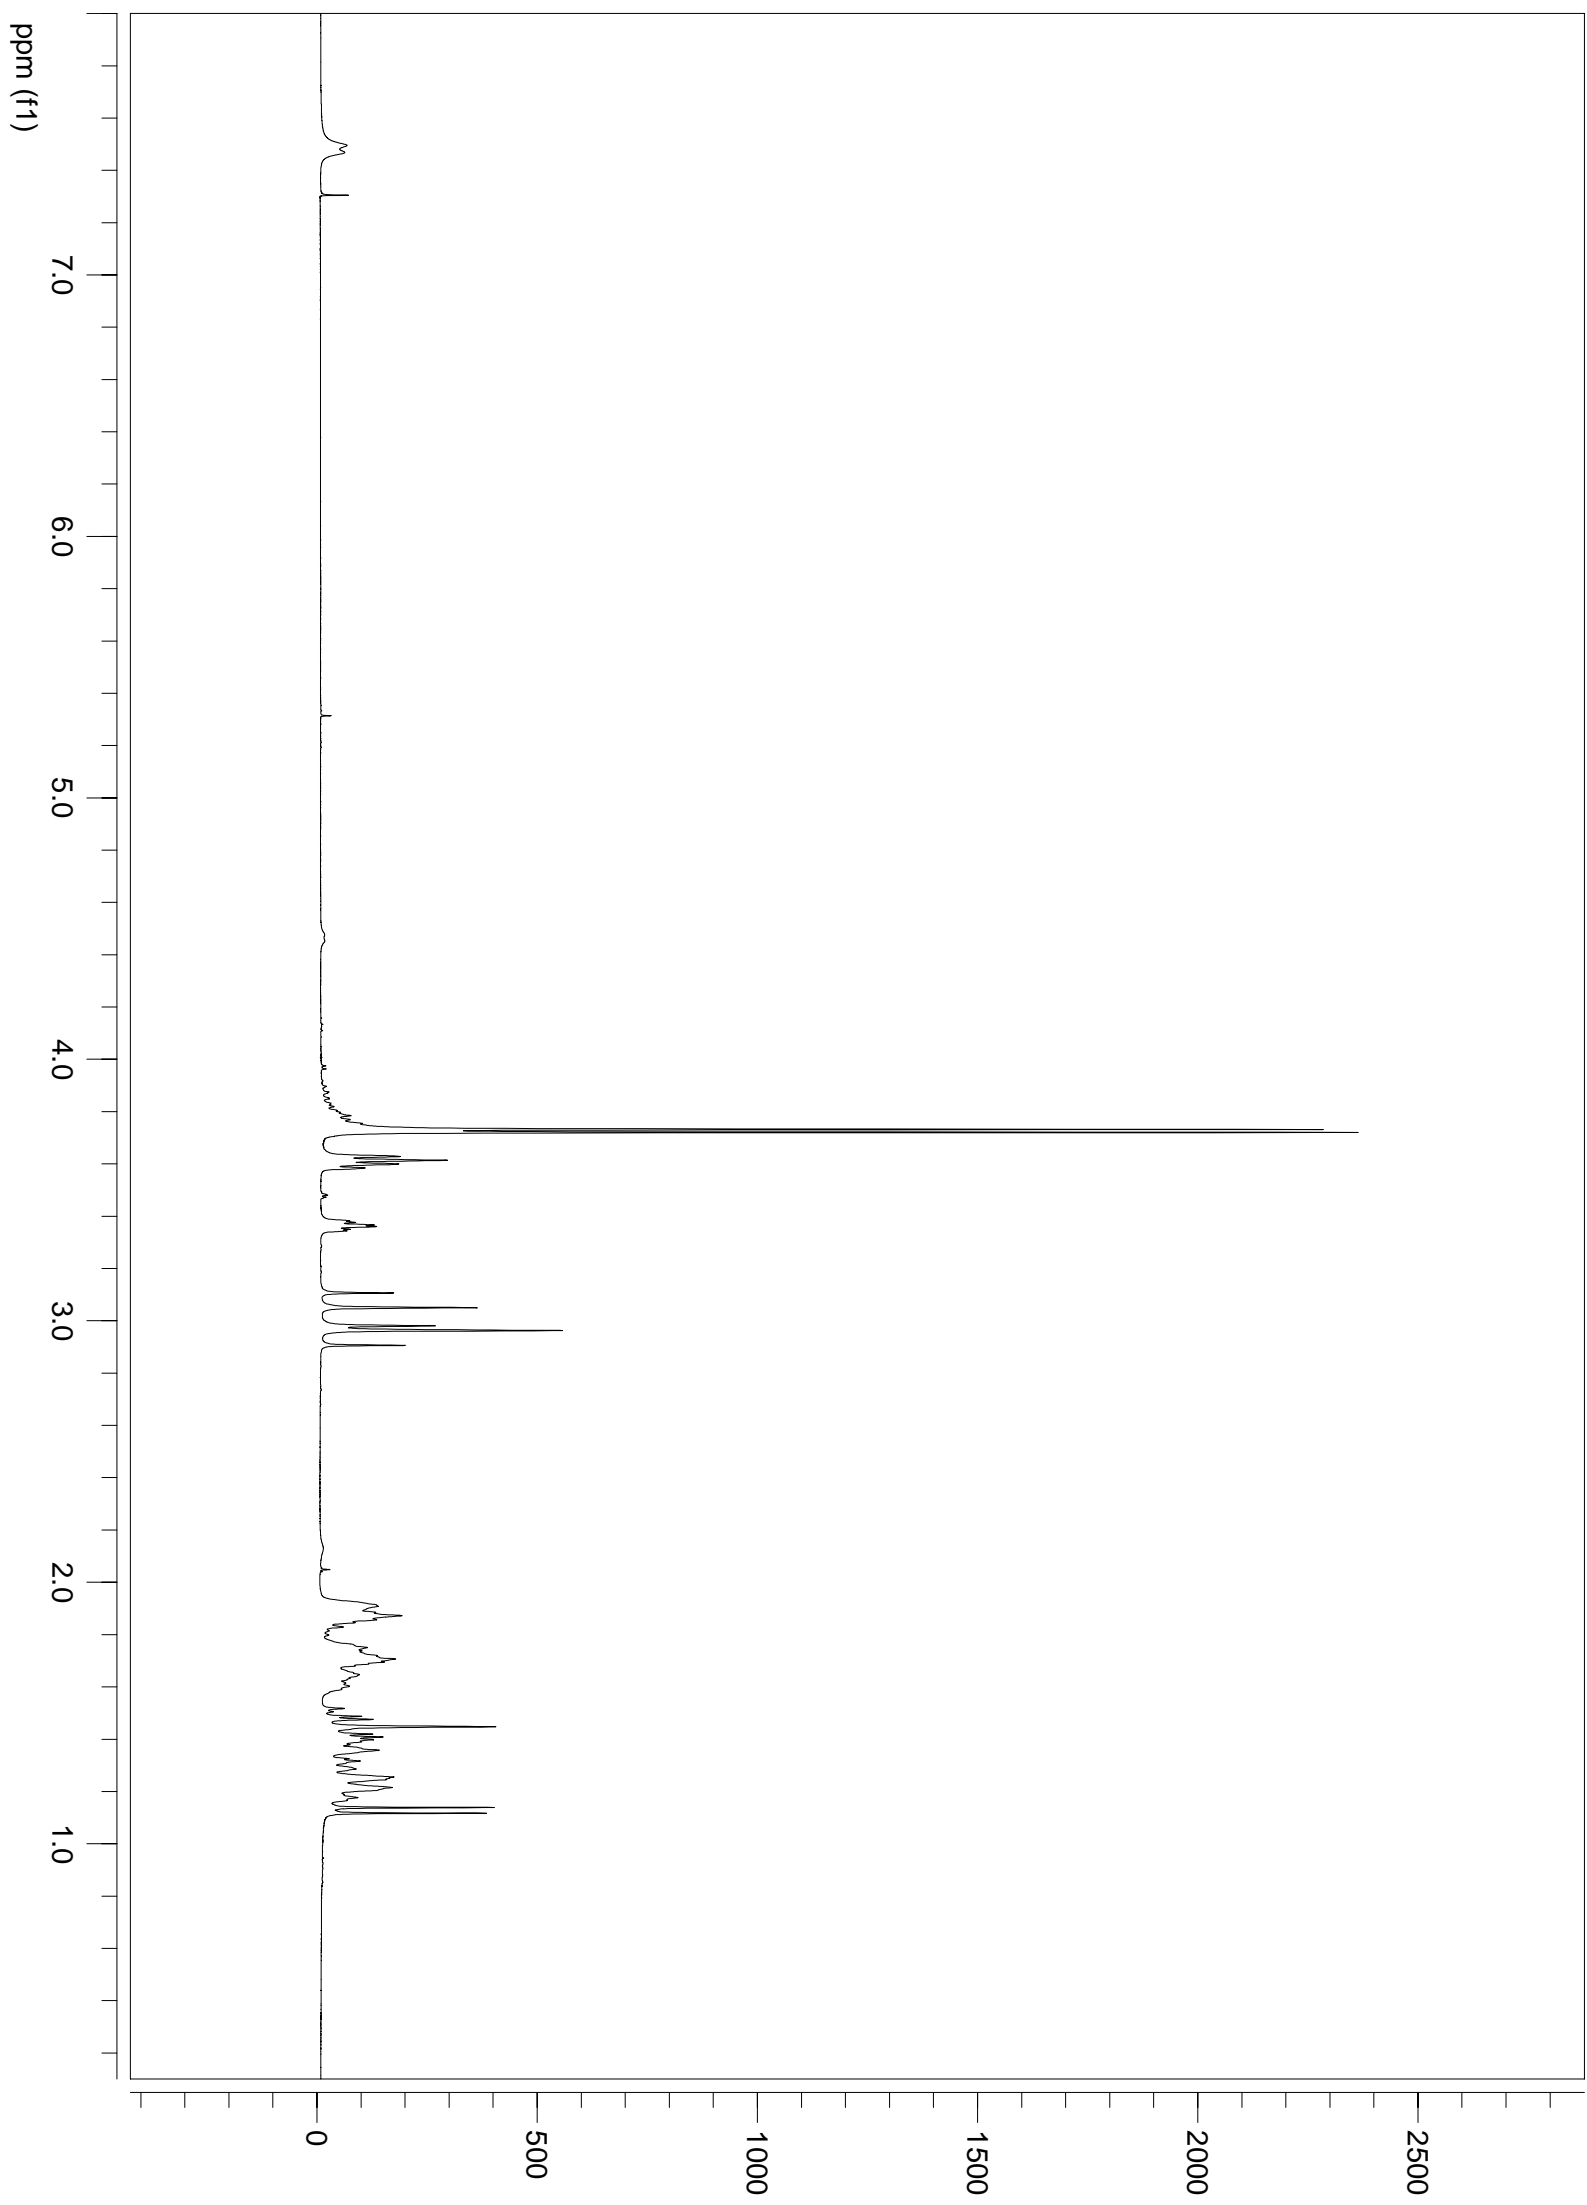

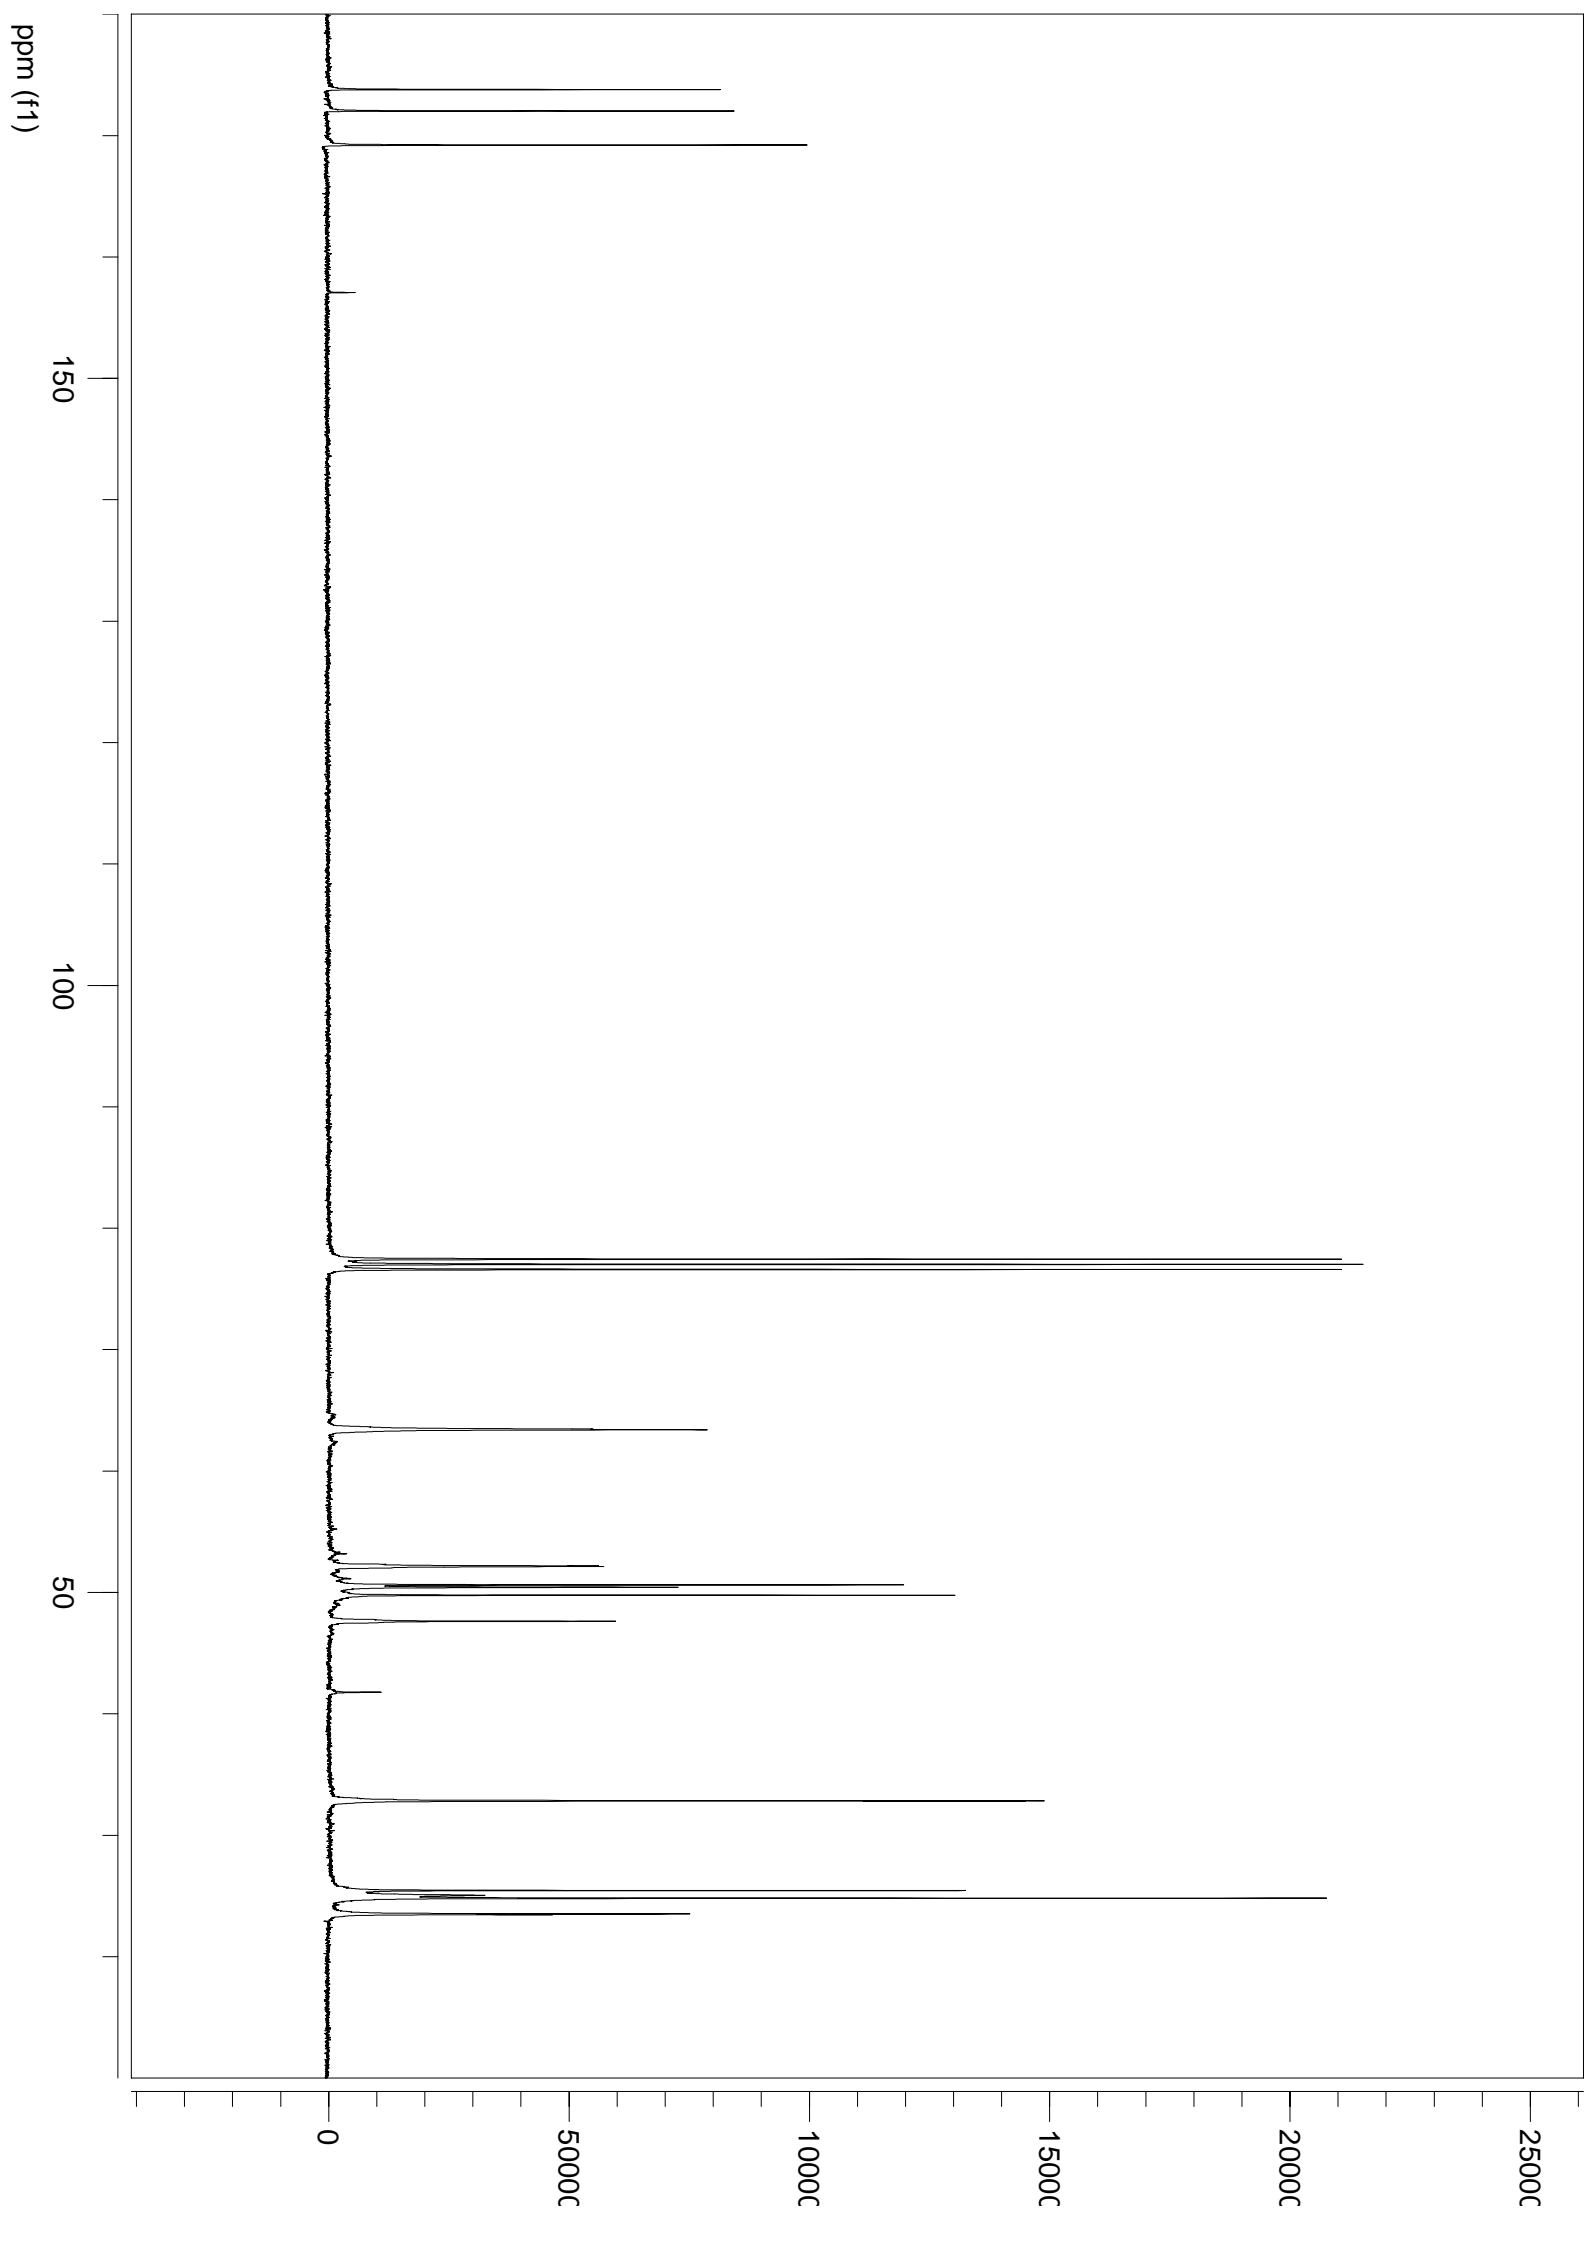

## Compound 13g

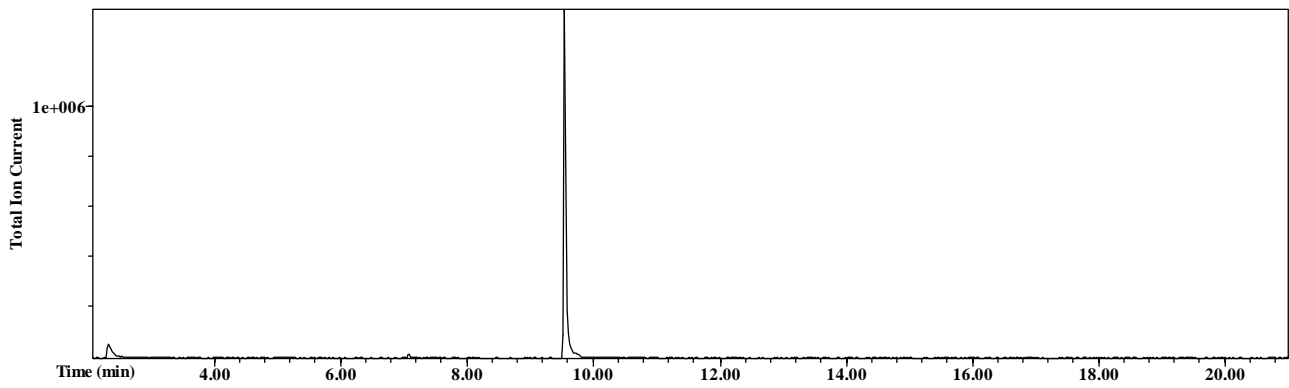

Acquired : 18 Dec 107 3:32 pm using AcqMethod ANDHIGH

---

| Retention Time | Area | Area % | Ratio % |
|----------------|------|--------|---------|
|----------------|------|--------|---------|

---

### Total Ion Chromatogram

|       |          |        |         |
|-------|----------|--------|---------|
| 2.341 | 2688531  | 6.622  | 7.091   |
| 9.553 | 37912171 | 93.378 | 100.000 |

---

## Single Product

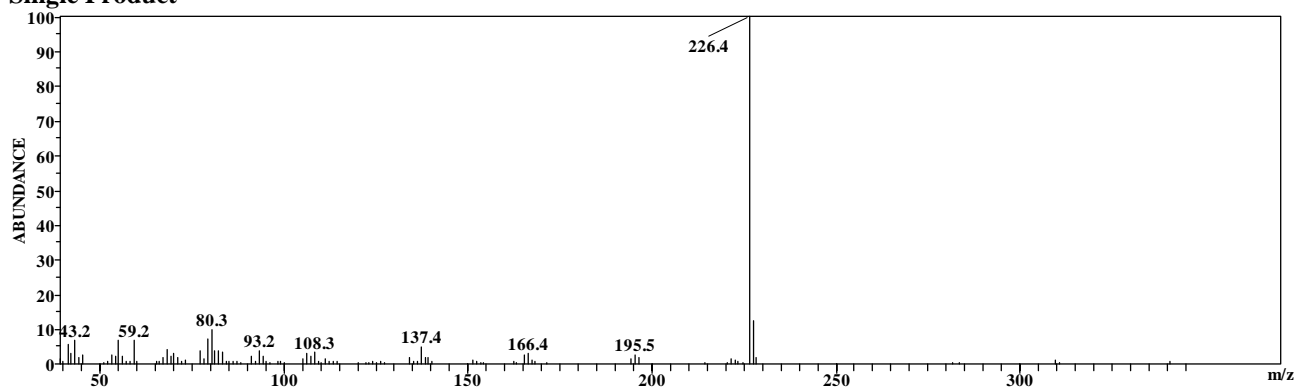

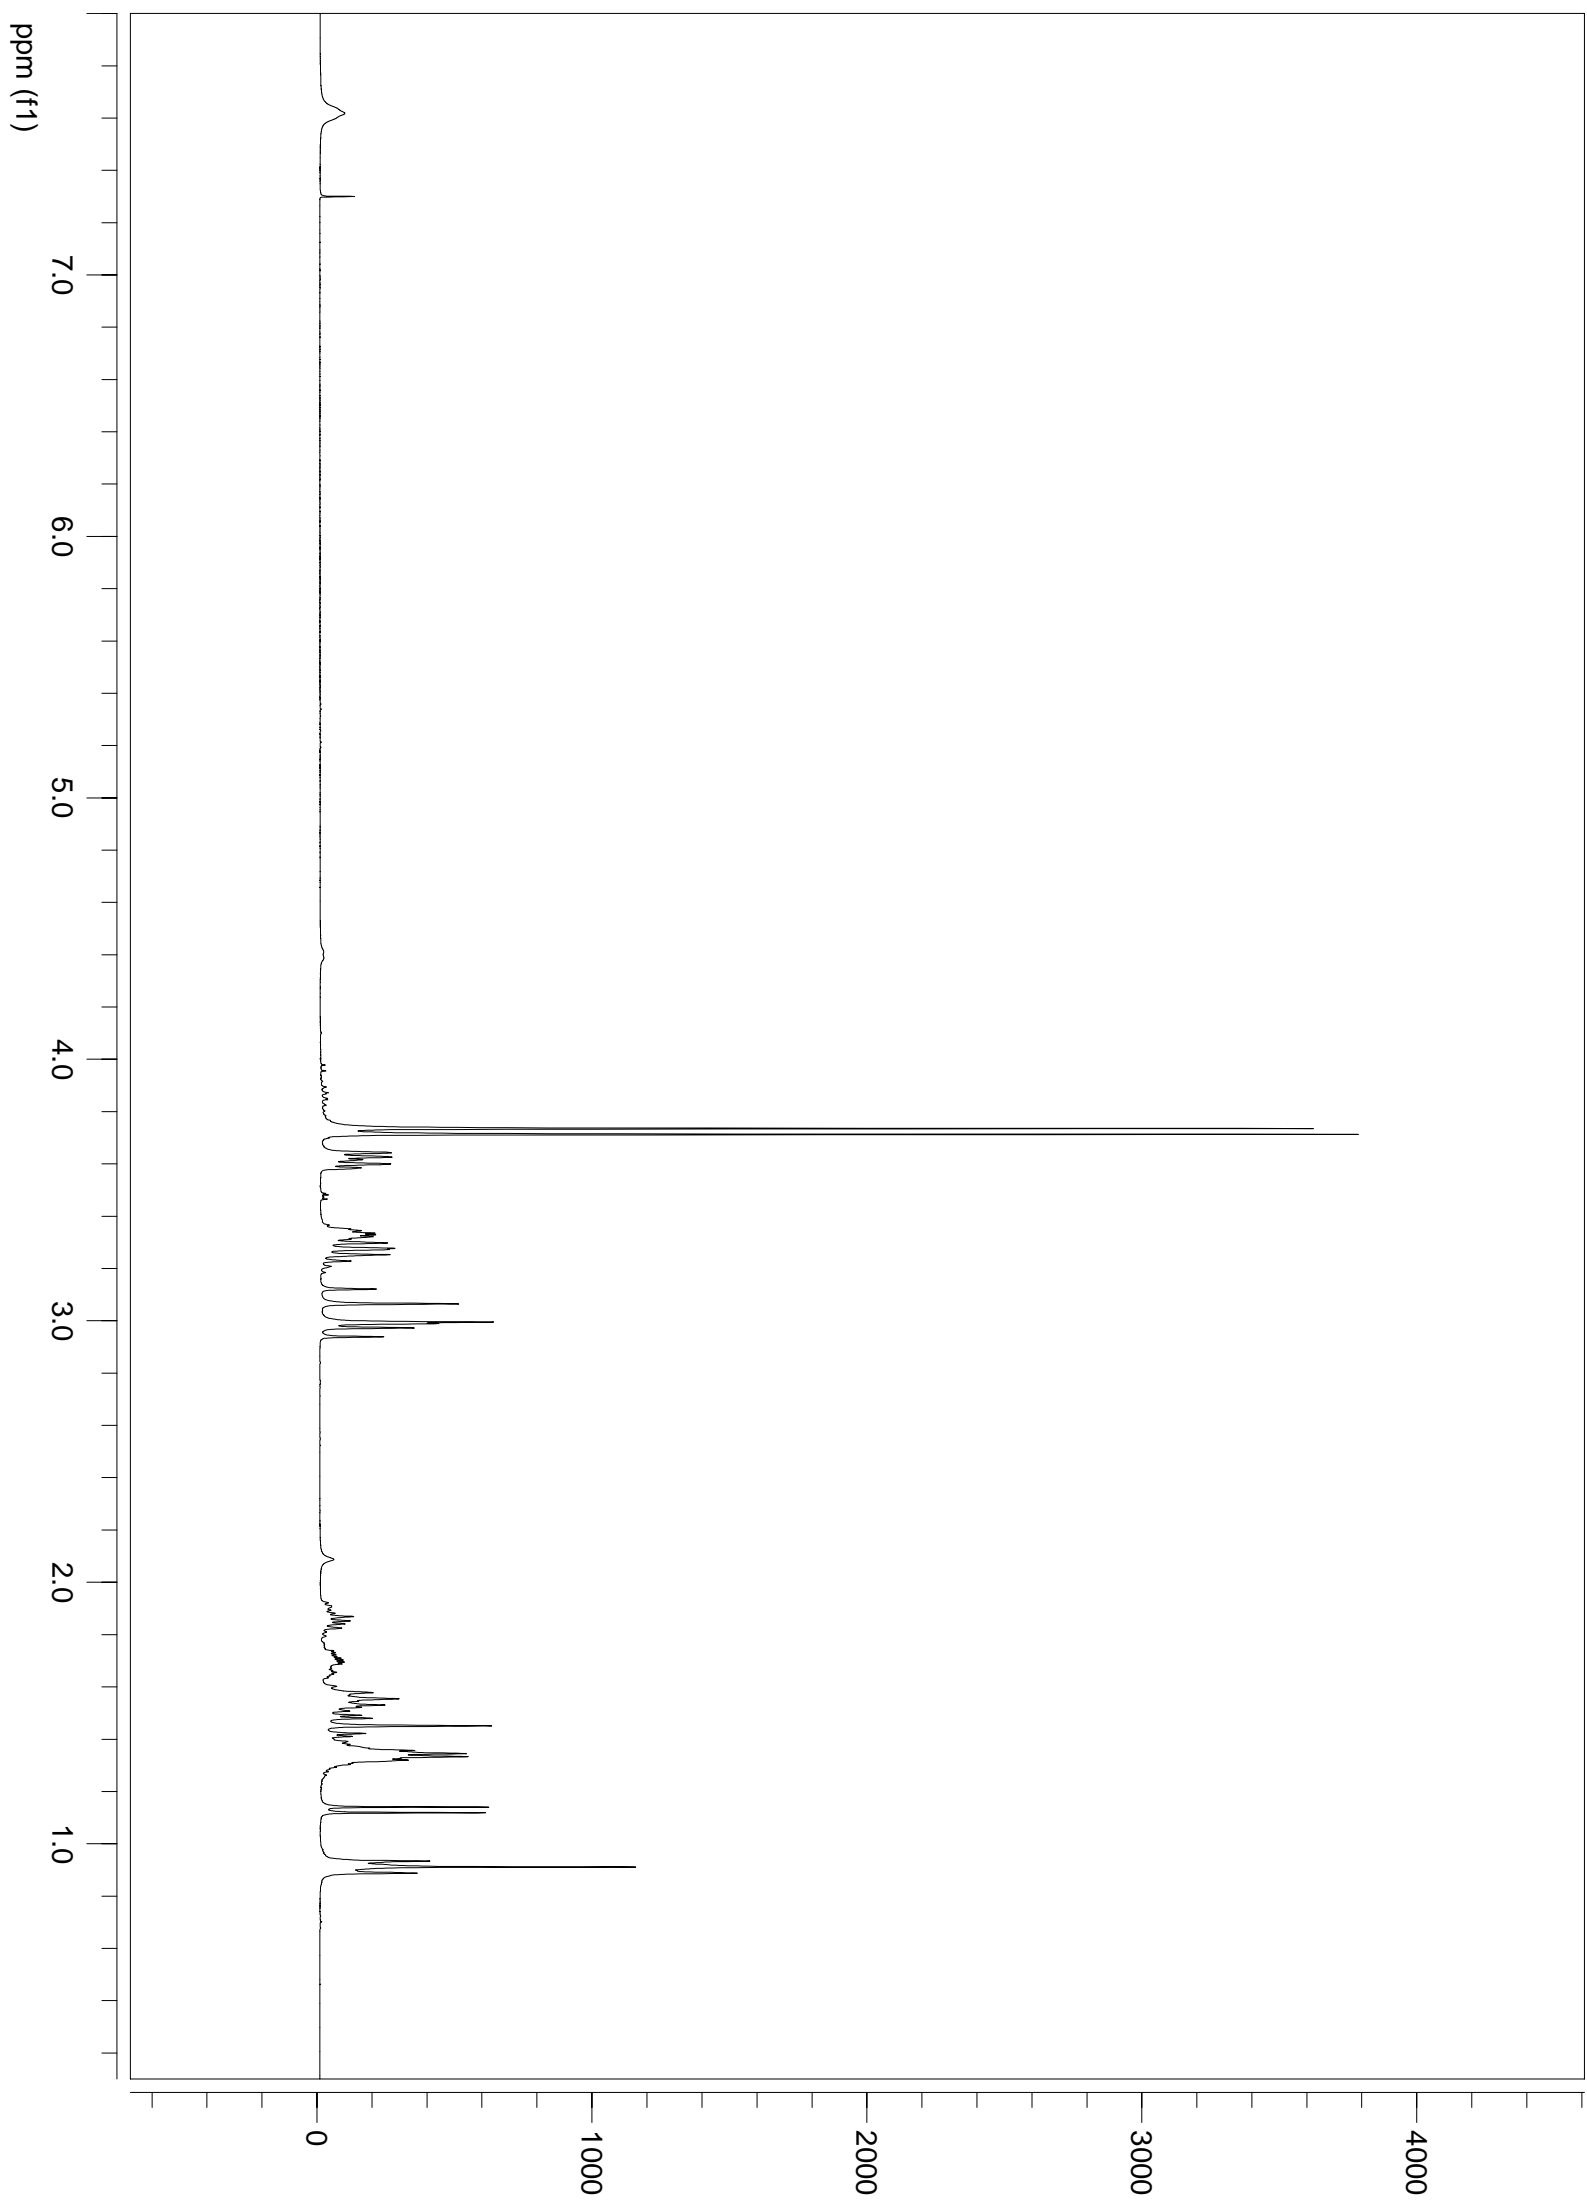

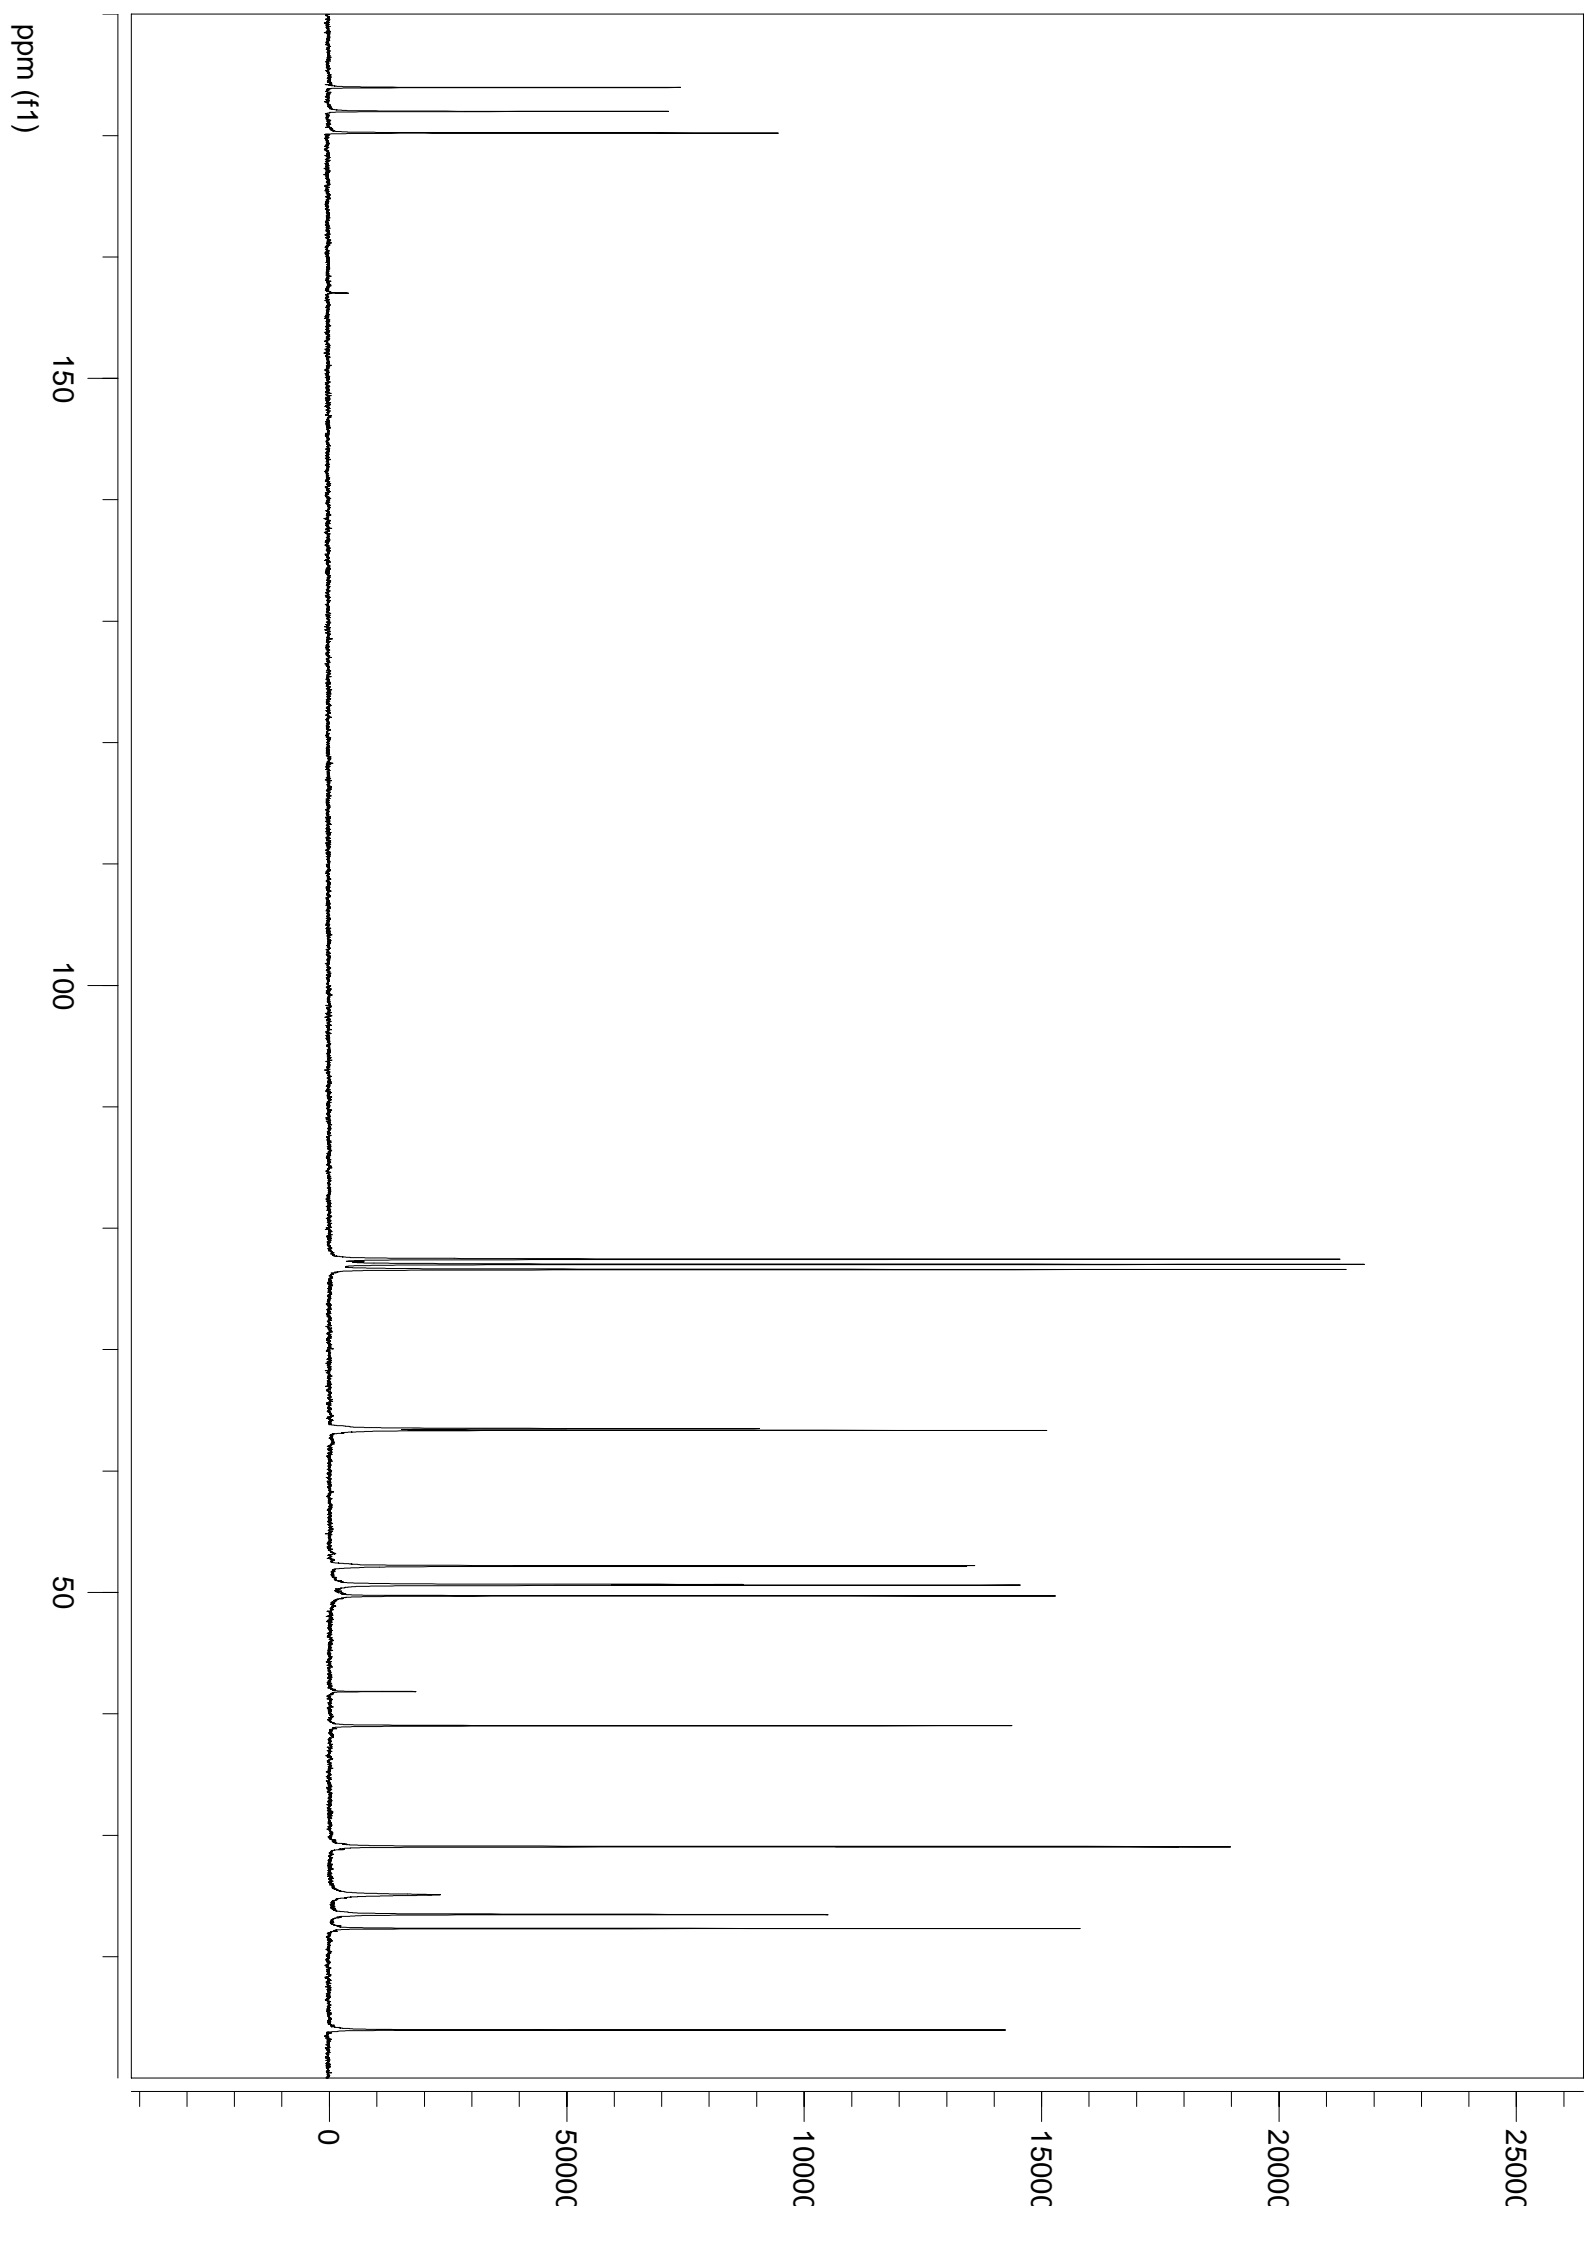



### Compound 13h

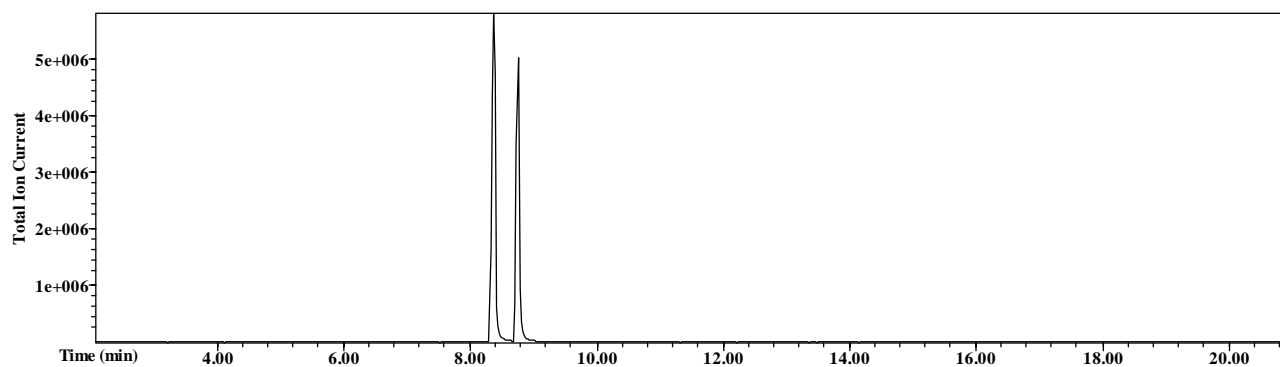

Acquired : 11 Jan 108 8:45 am using AcqMethod ANDHIGH

---

| Retention Time | Area | Area % | Ratio % |
|----------------|------|--------|---------|
|----------------|------|--------|---------|

---

#### Total Ion Chromatogram

|       |           |        |         |
|-------|-----------|--------|---------|
| 8.382 | 229258823 | 59.751 | 100.000 |
| 8.764 | 154432064 | 40.249 | 67.361  |

---

#### Major Diastereoisomer

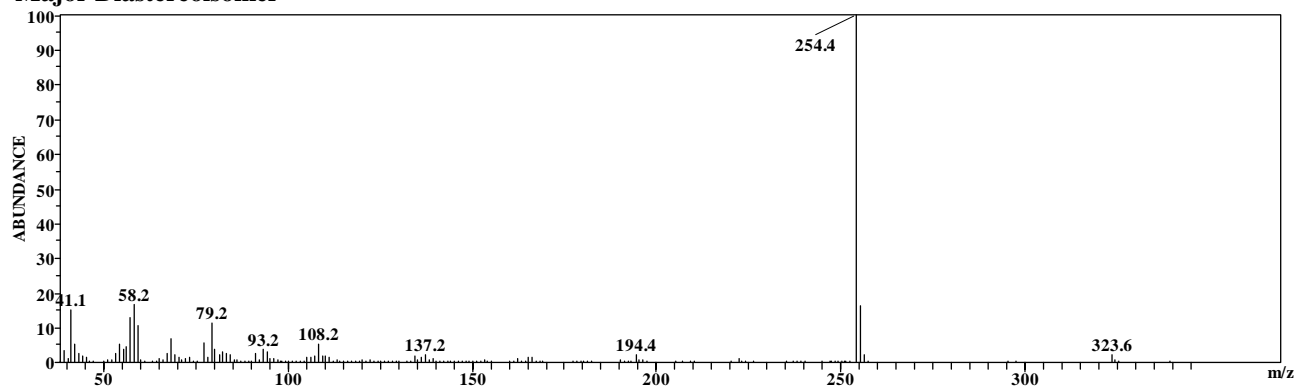

#### Minor Diastereoisomer

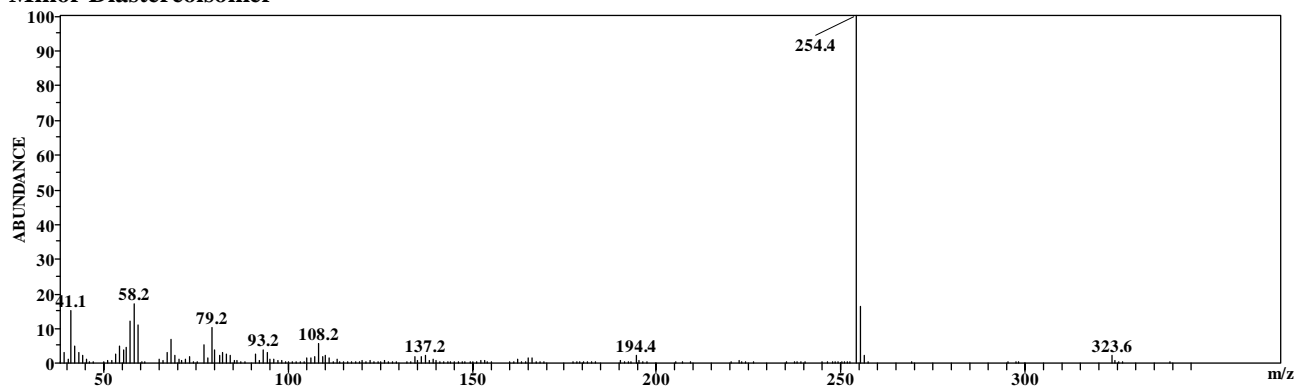

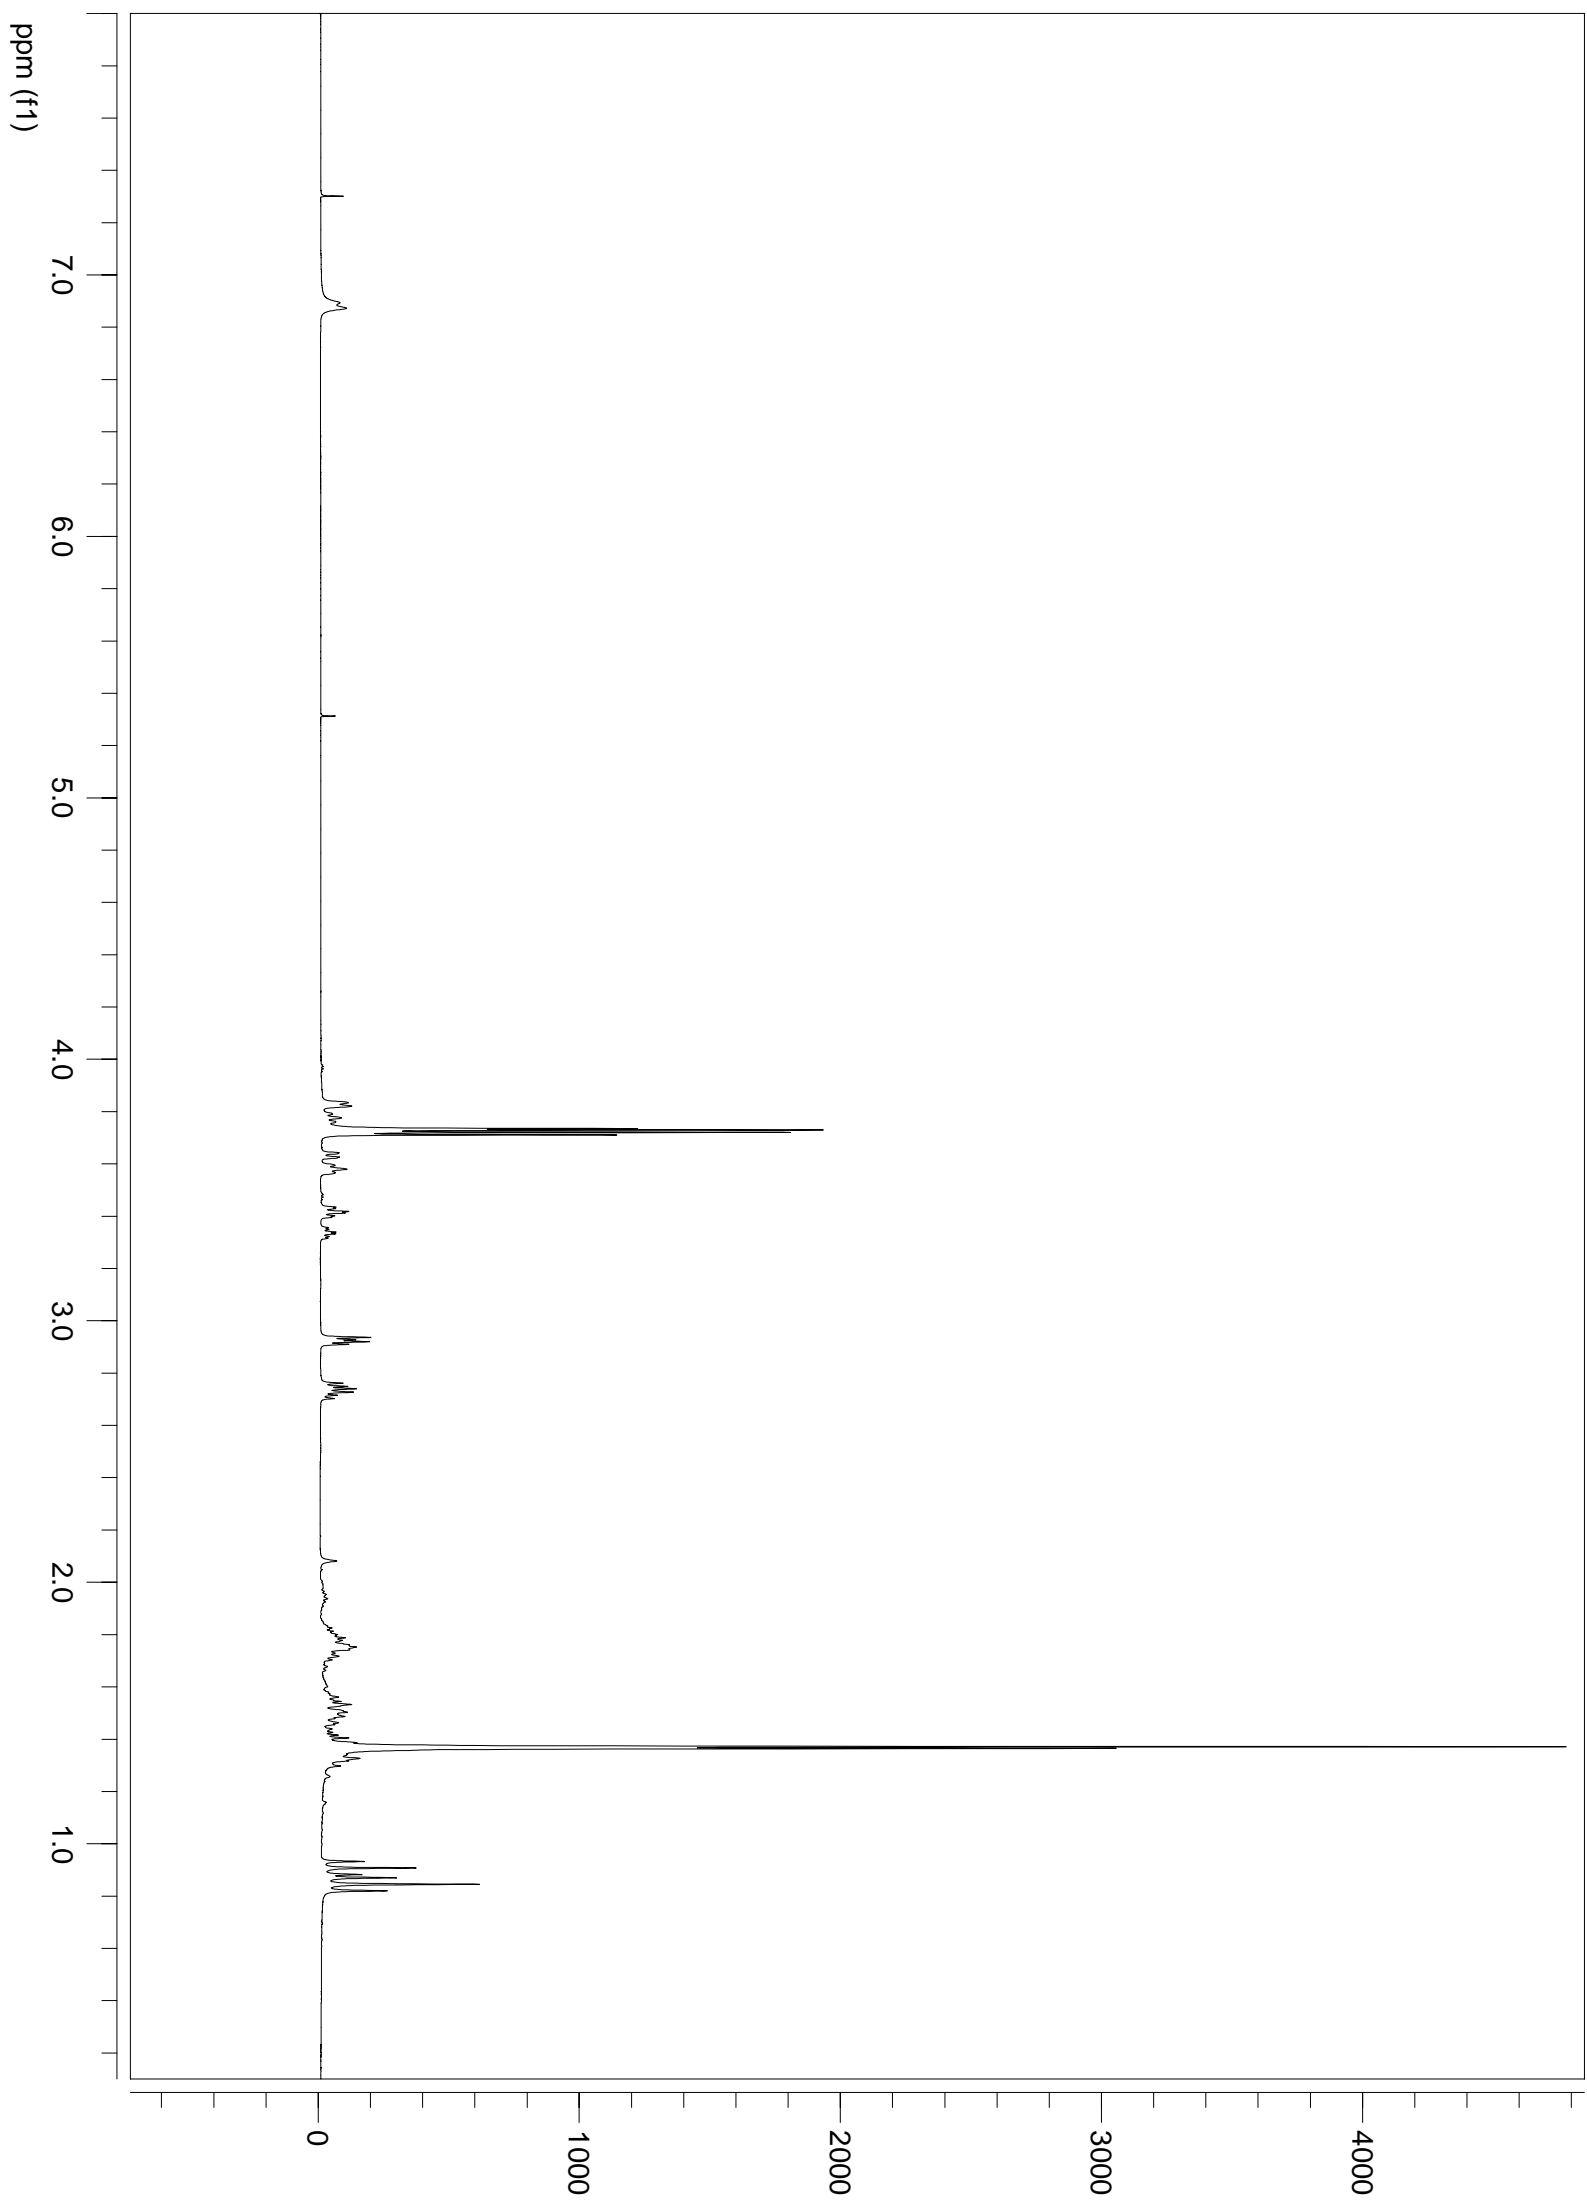

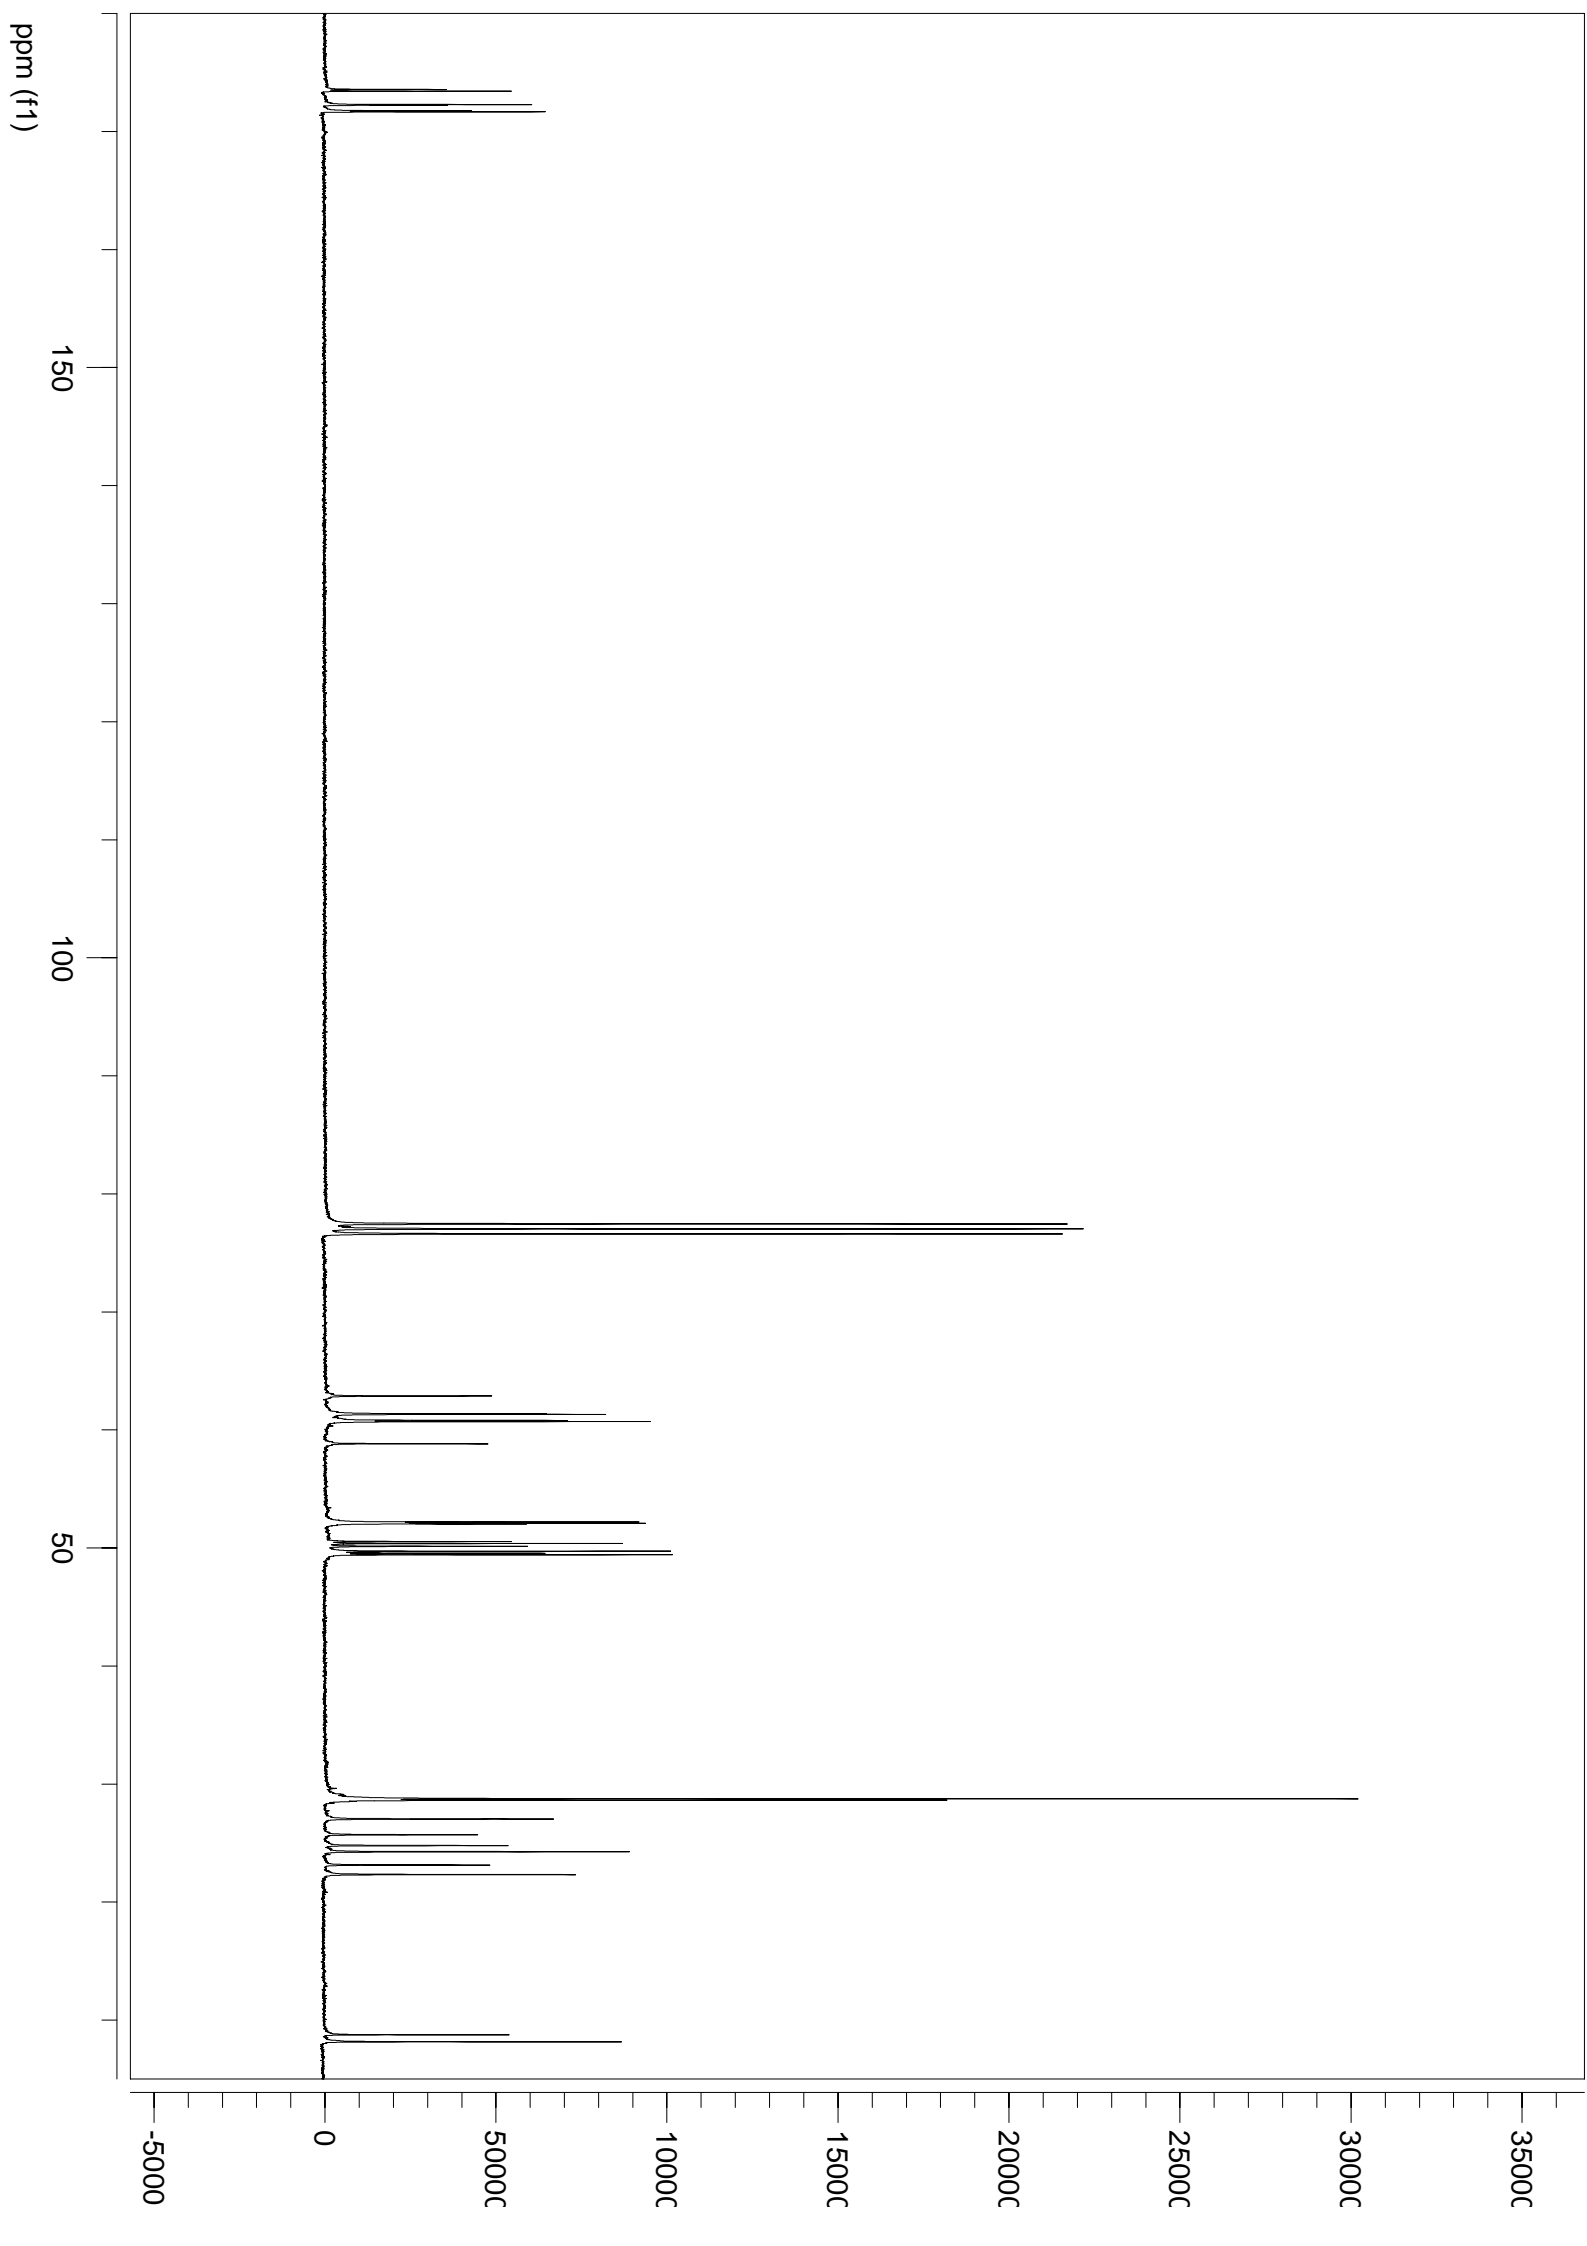

### Compound 13i

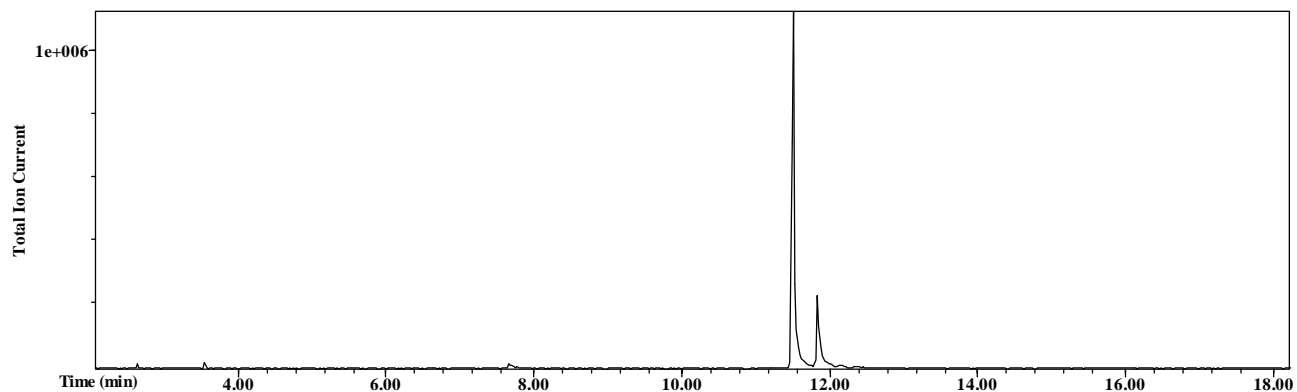

Acquired : 14 Jan 108 4:44 pm using AcqMethod ANDHIGH

---

| Retention Time | Area | Area % | Ratio % |
|----------------|------|--------|---------|
|----------------|------|--------|---------|

---

#### Total Ion Chromatogram

|        |          |        |         |
|--------|----------|--------|---------|
| 11.525 | 33574387 | 81.136 | 100.000 |
| 11.858 | 7806167  | 18.864 | 23.250  |

---

### Major Diastereoisomer

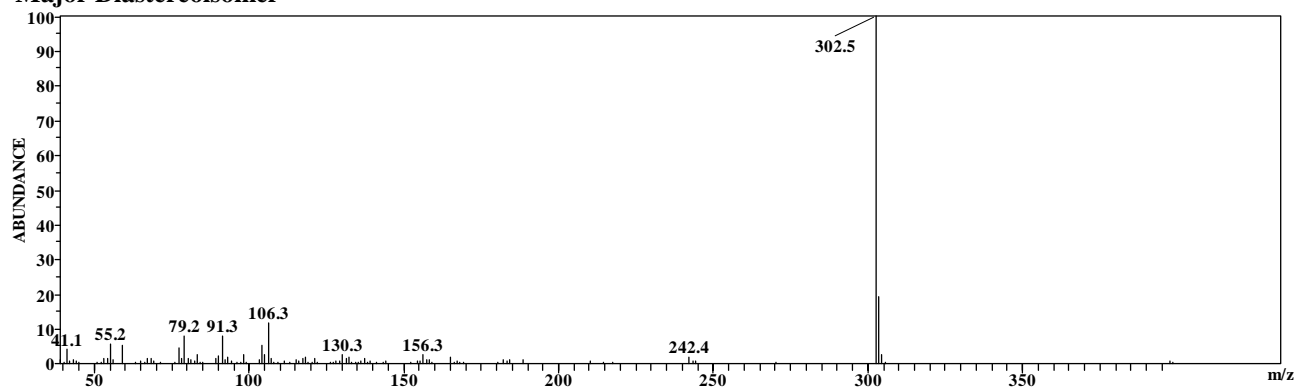

### Minor Diastereoisomer

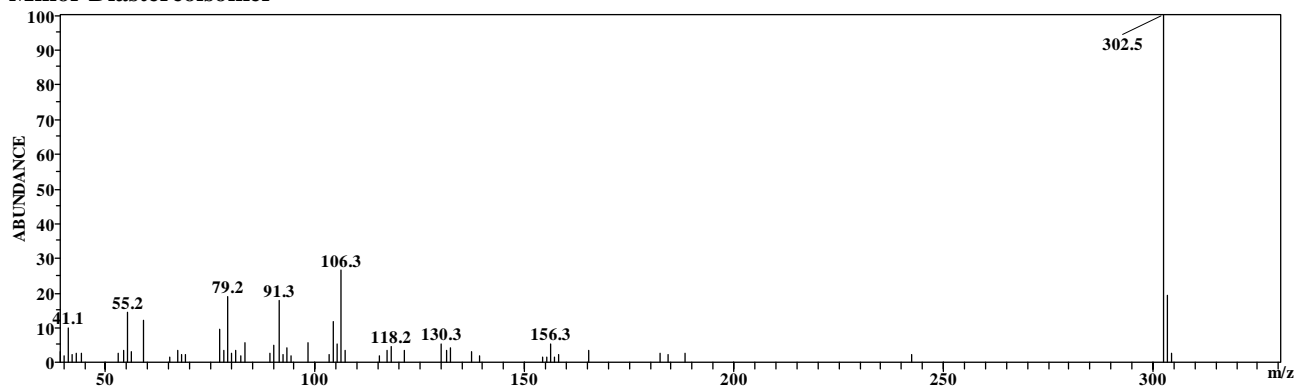

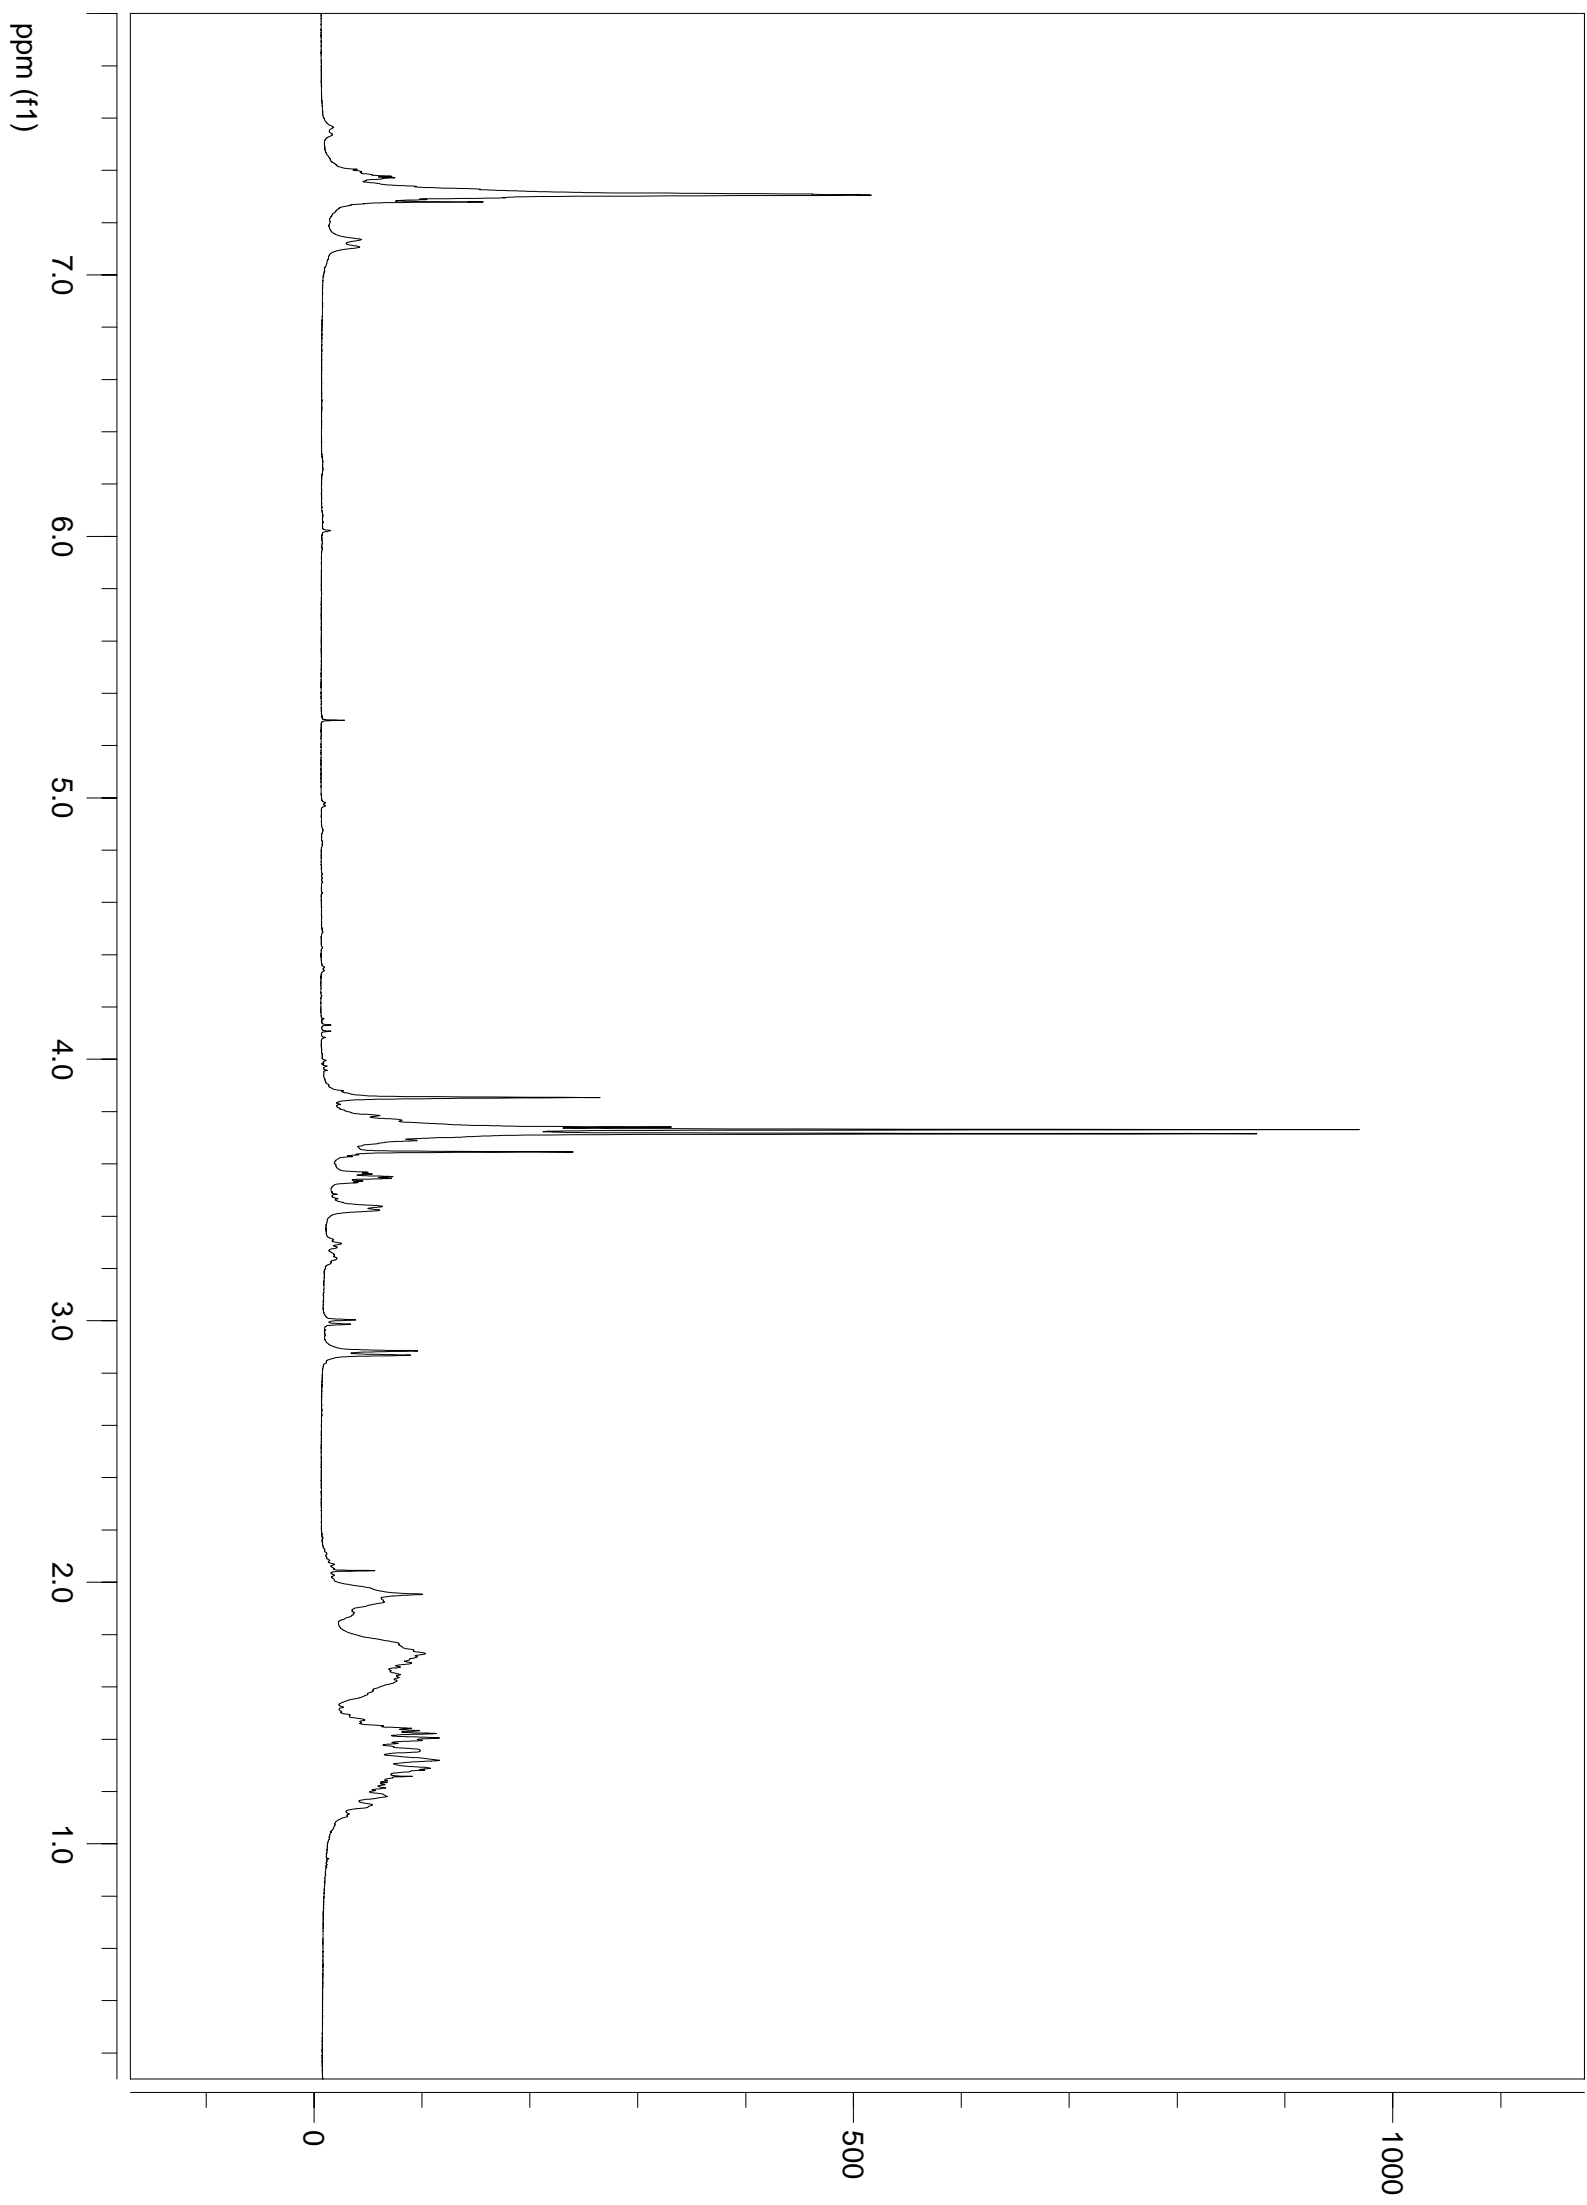

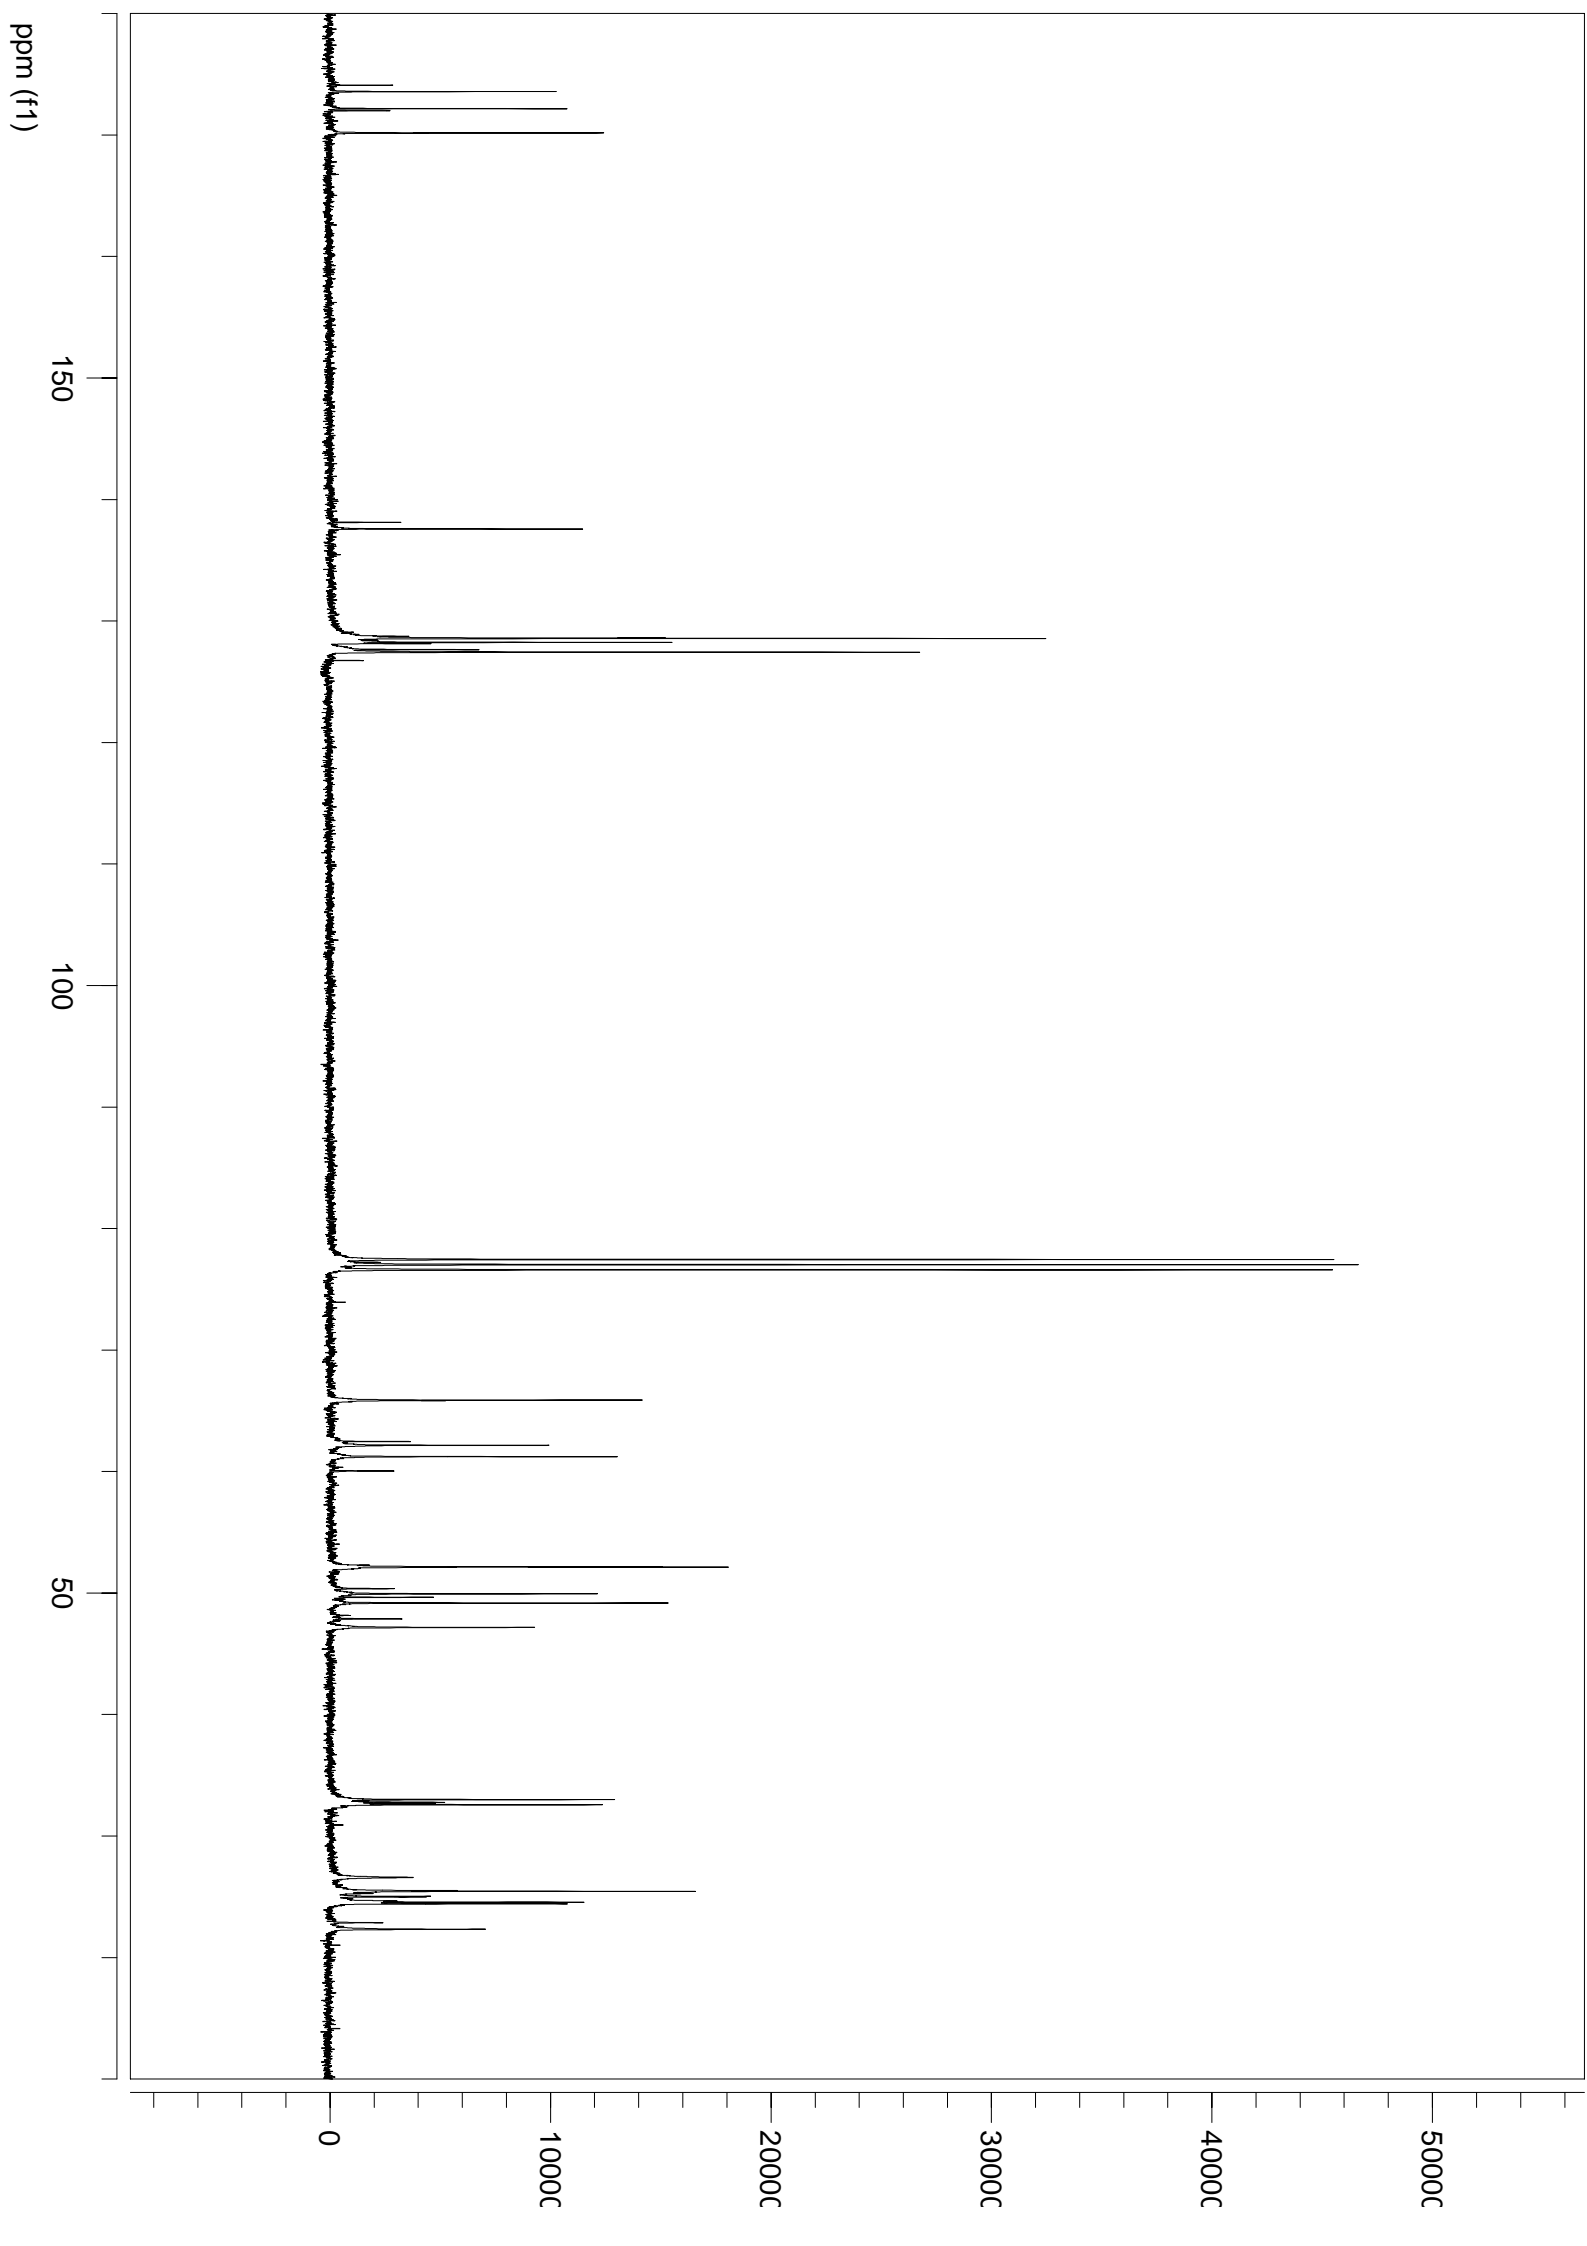

### Compound 13j

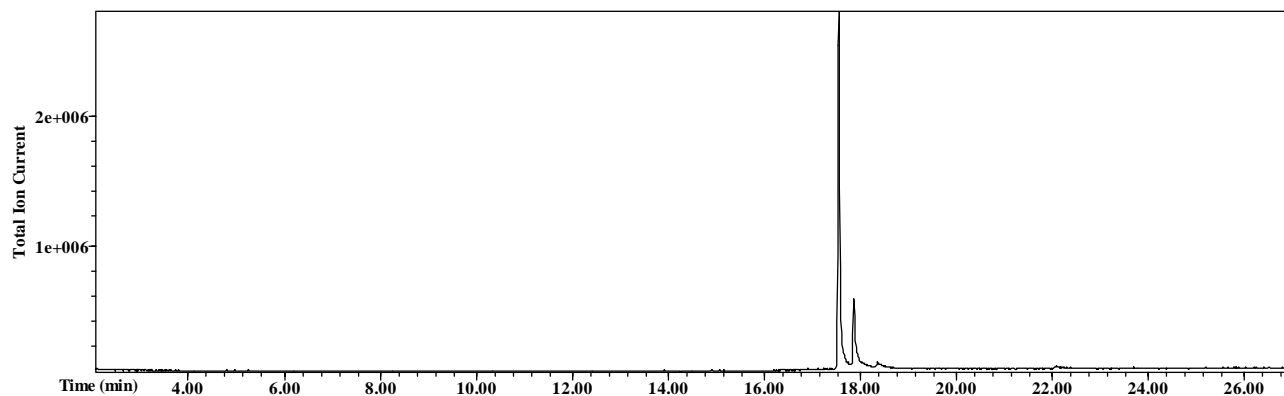

Acquired : 18 Jan 108 8:16 am using AcqMethod PAOLA

---

| Retention Time | Area | Area % | Ratio % |
|----------------|------|--------|---------|
|----------------|------|--------|---------|

---

#### Total Ion Chromatogram

|        |          |        |         |
|--------|----------|--------|---------|
| 17.554 | 81526409 | 79.953 | 100.000 |
| 17.869 | 20441773 | 20.047 | 25.074  |

---

#### Major Diastereoisomer

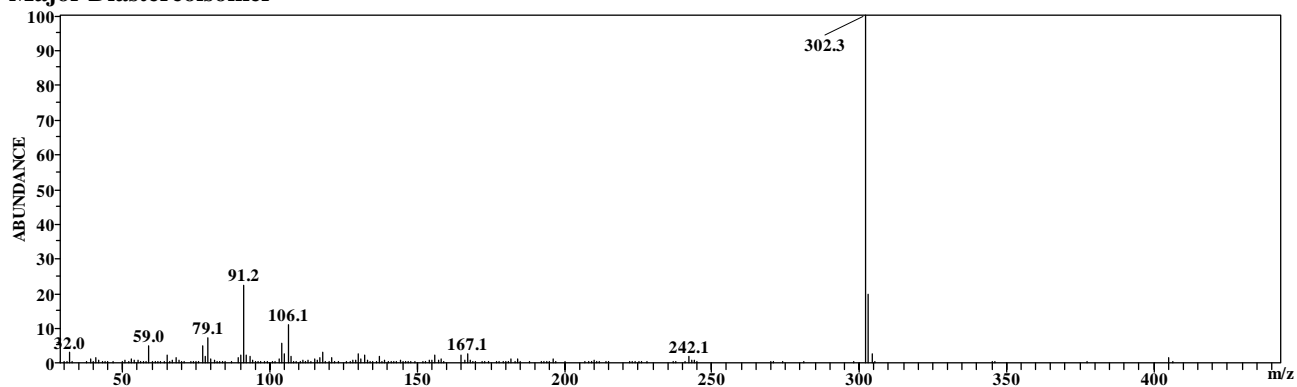

#### Minor Diastereoisomer

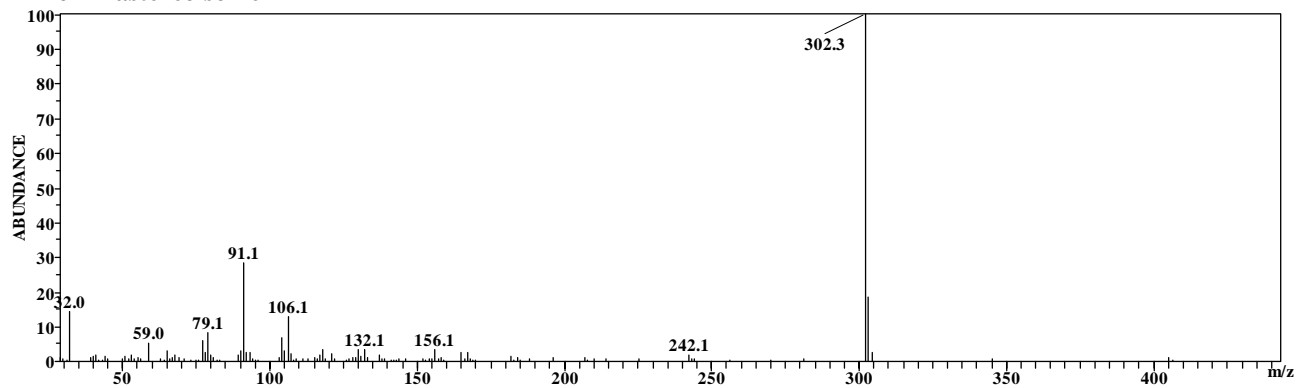

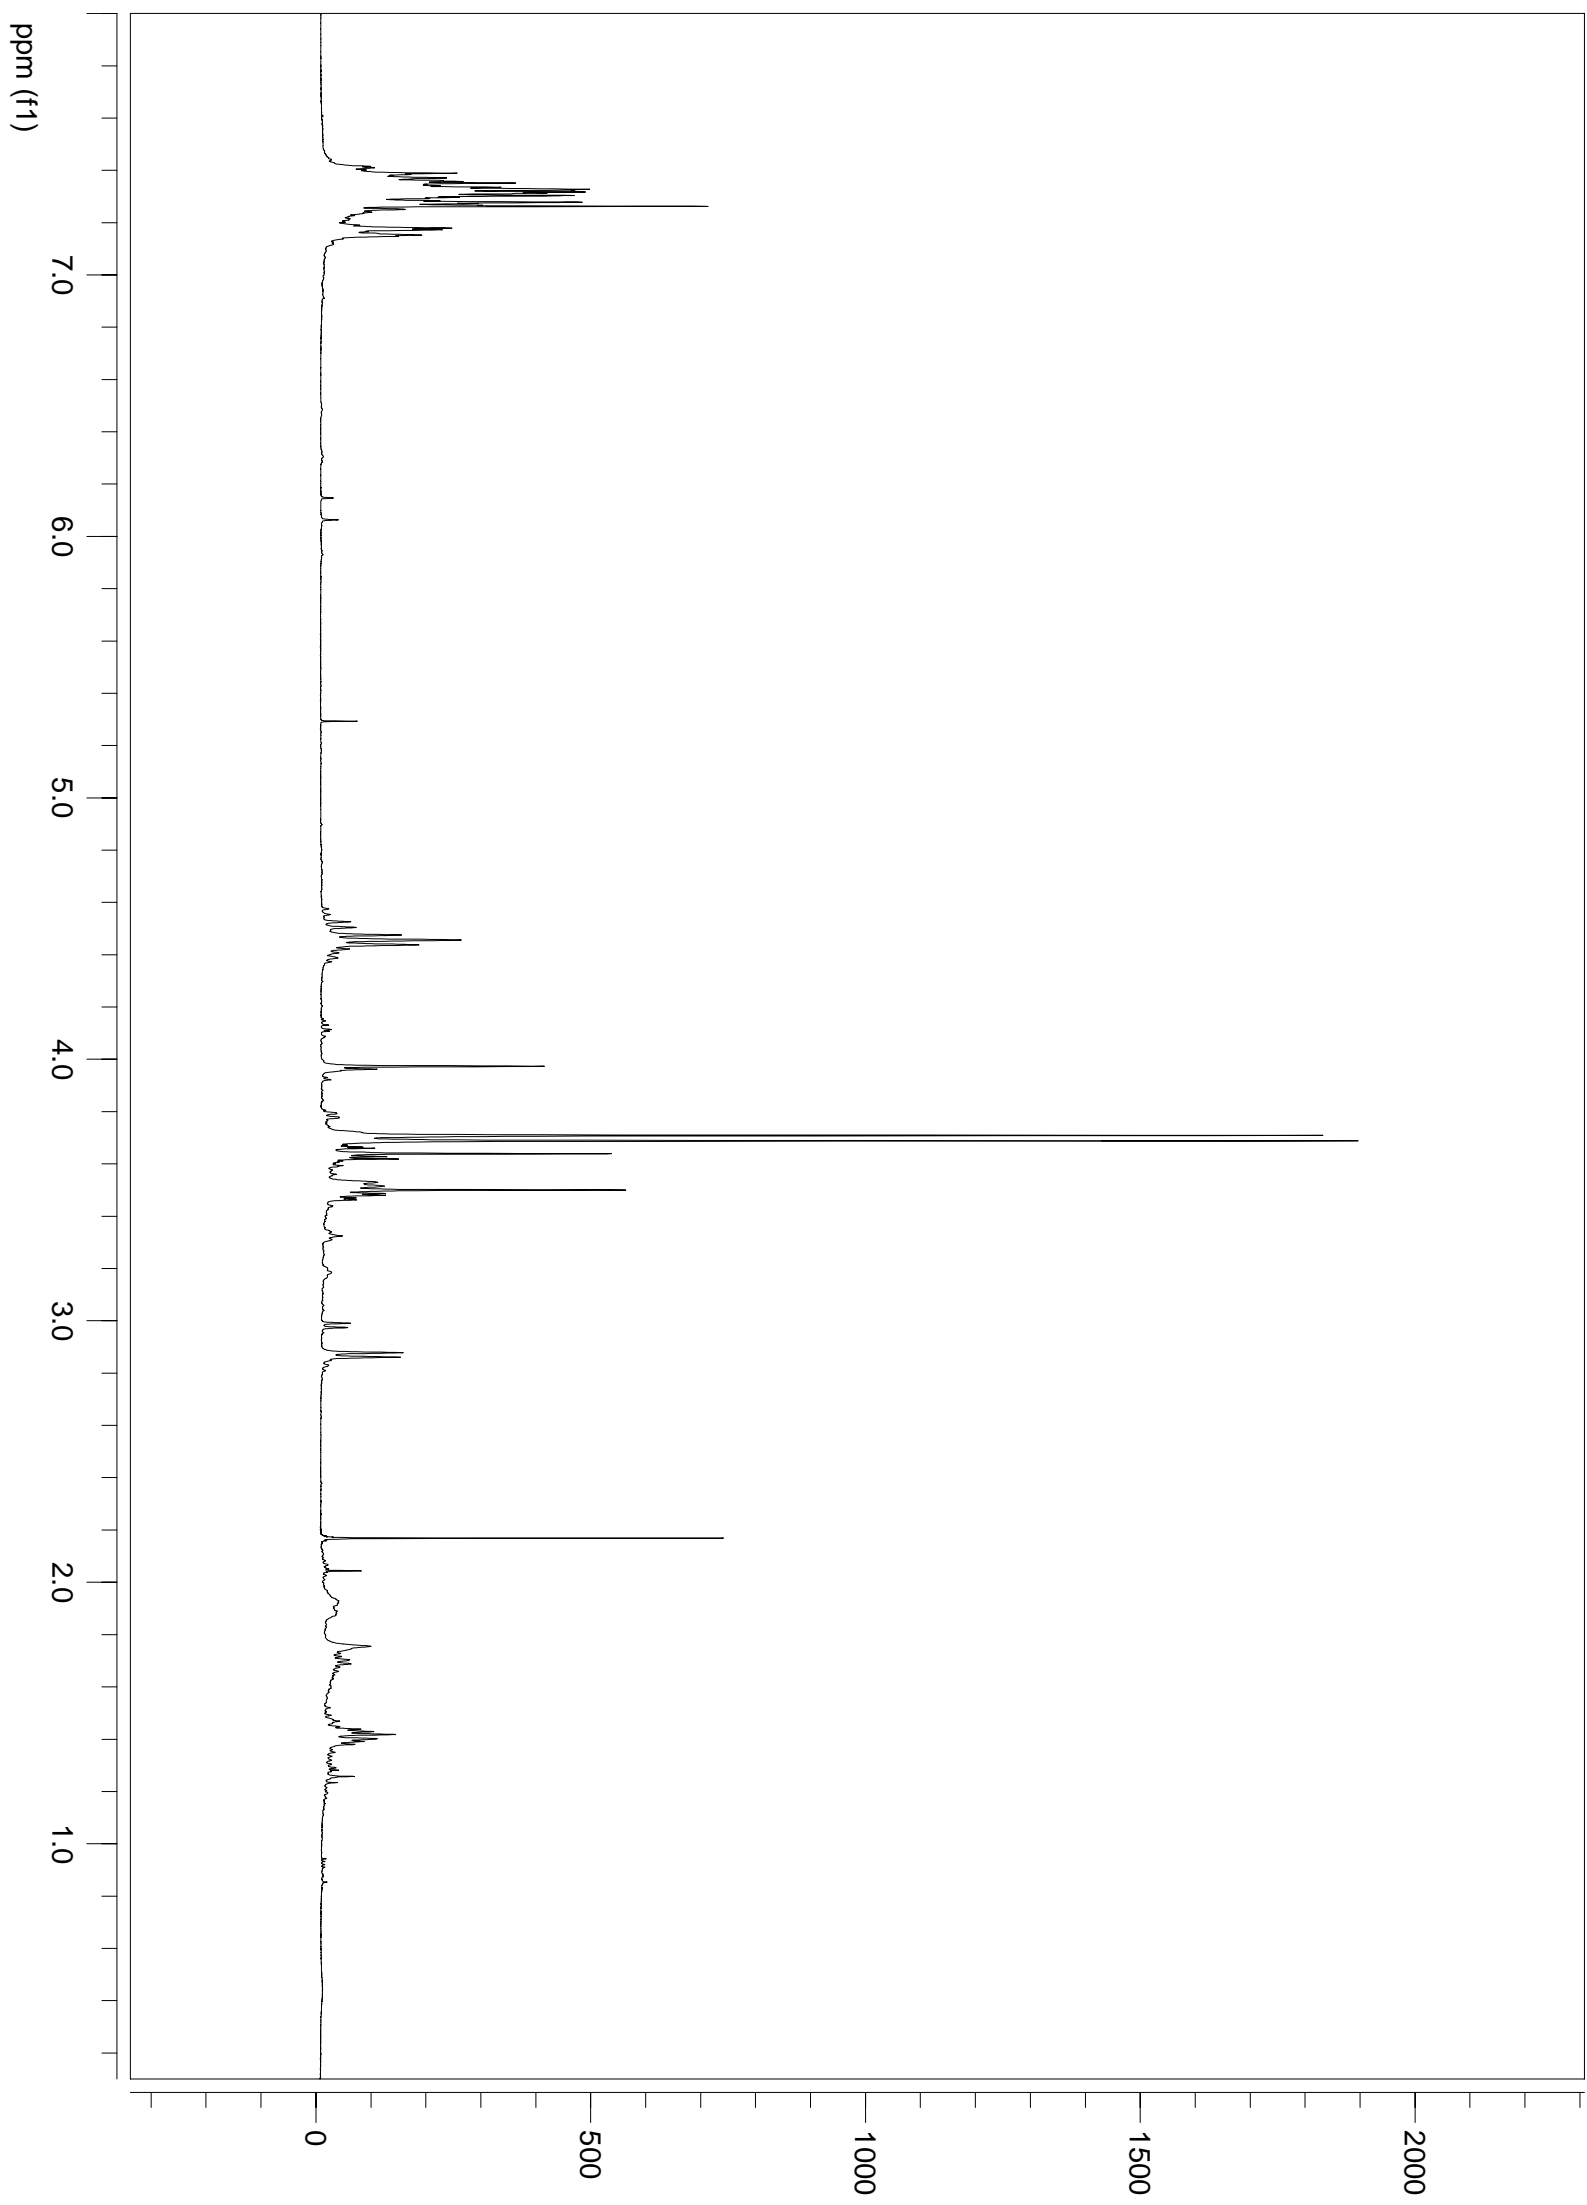



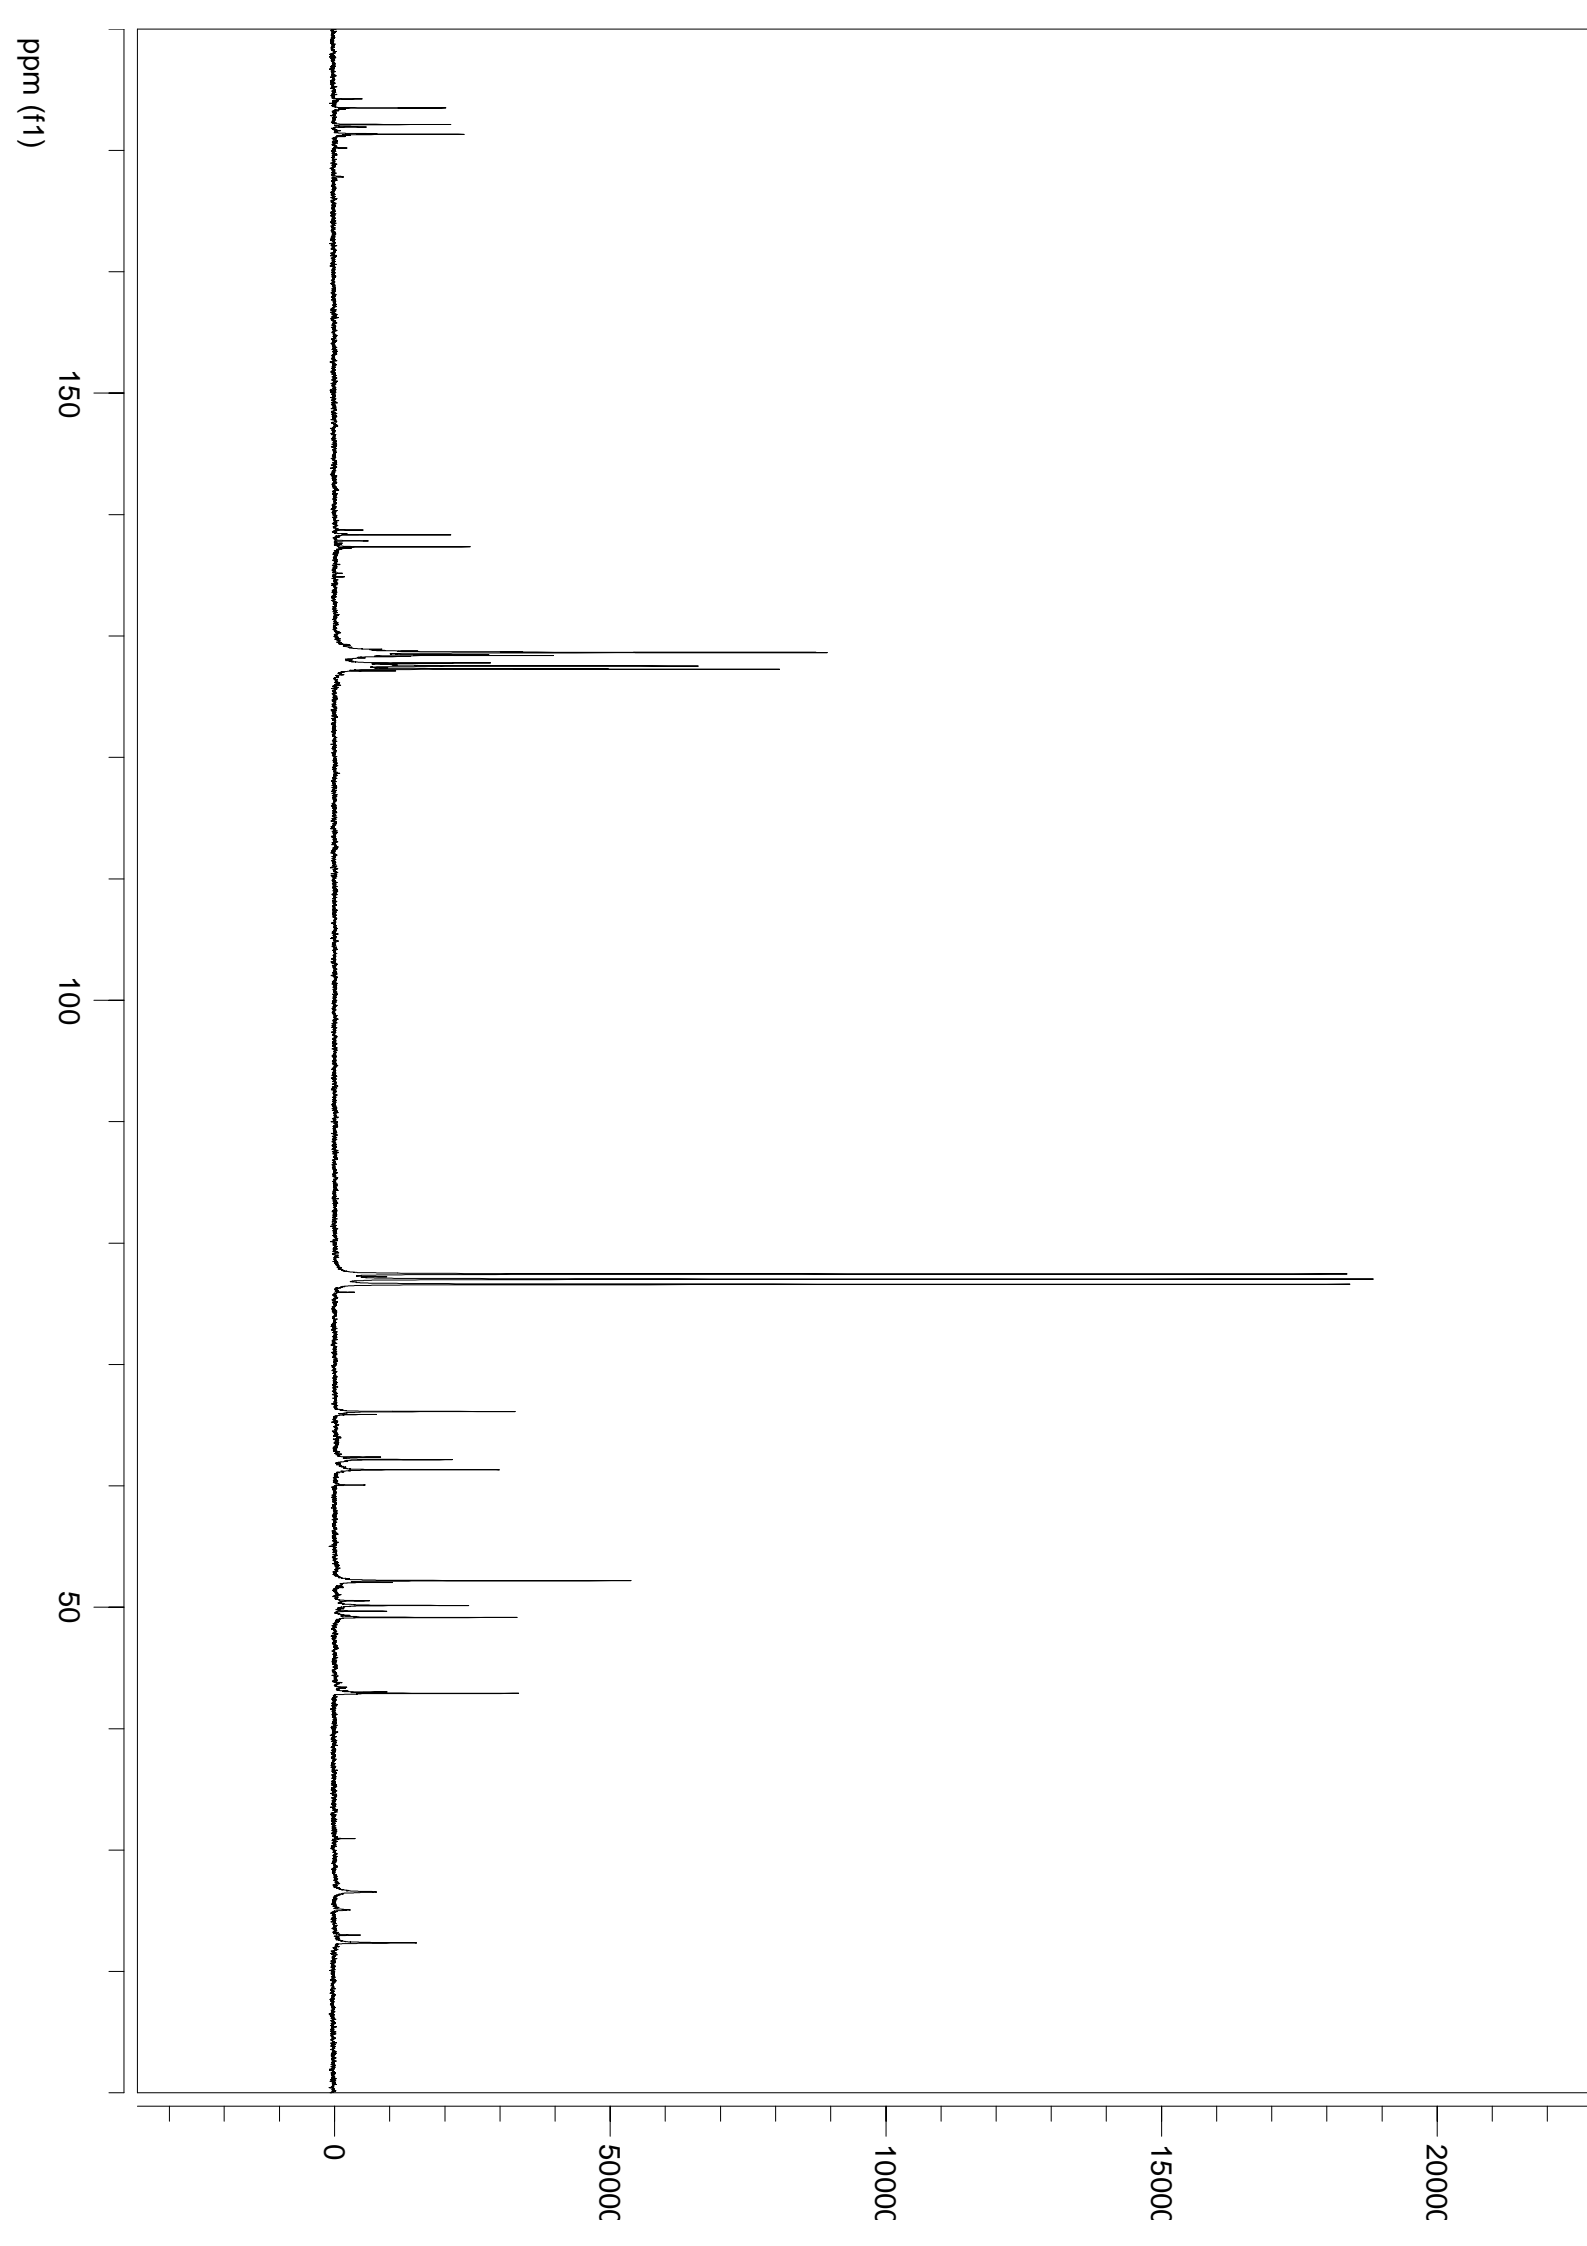

### Compound 13k

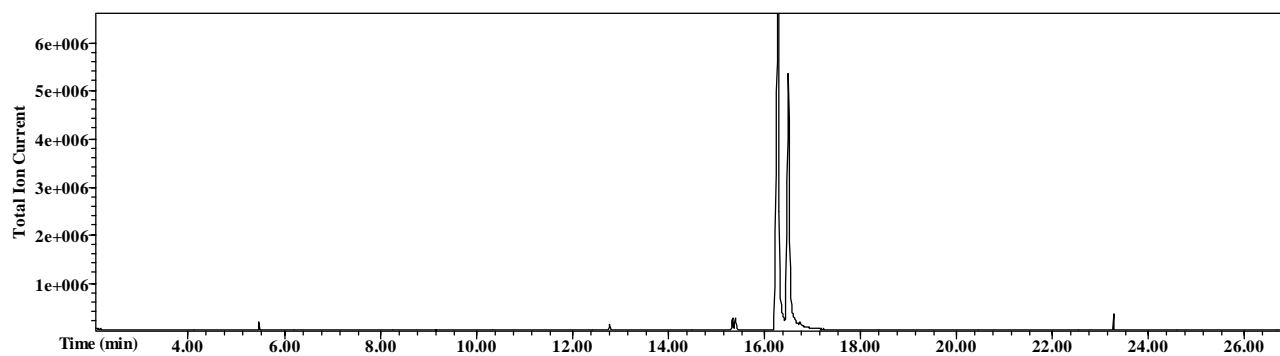

Acquired : 24 Jan 108 2:50 pm using AcqMethod PAOLA

---

| Retention Time | Area | Area % | Ratio % |
|----------------|------|--------|---------|
|----------------|------|--------|---------|

---

#### Total Ion Chromatogram

|        |           |        |         |
|--------|-----------|--------|---------|
| 5.473  | 1126842   | 0.223  | 0.379   |
| 15.339 | 4317620   | 0.855  | 1.451   |
| 15.404 | 5237914   | 1.037  | 1.761   |
| 16.299 | 297491108 | 58.907 | 100.000 |
| 16.518 | 194617758 | 38.537 | 65.420  |
| 23.301 | 2223774   | 0.440  | 0.748   |

---

#### Major Diastereoisomer

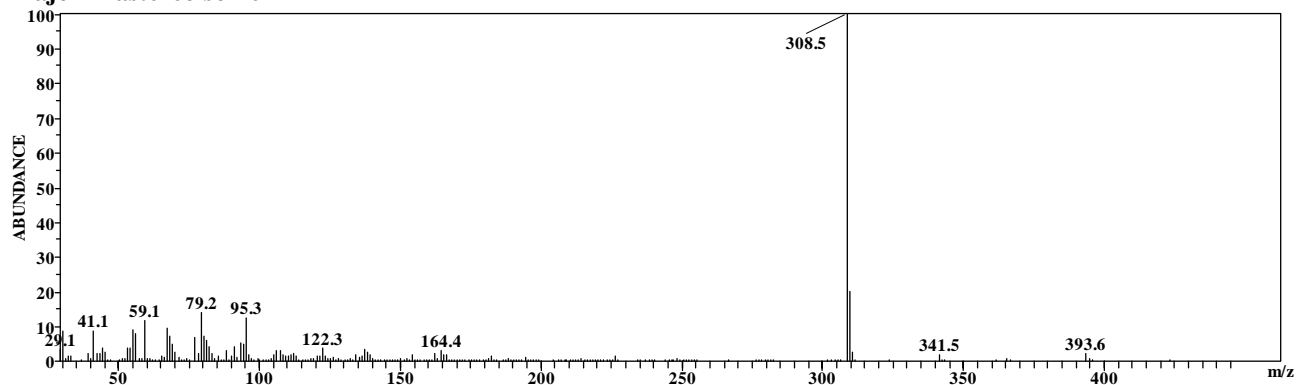

#### Minor Diastereoisomer

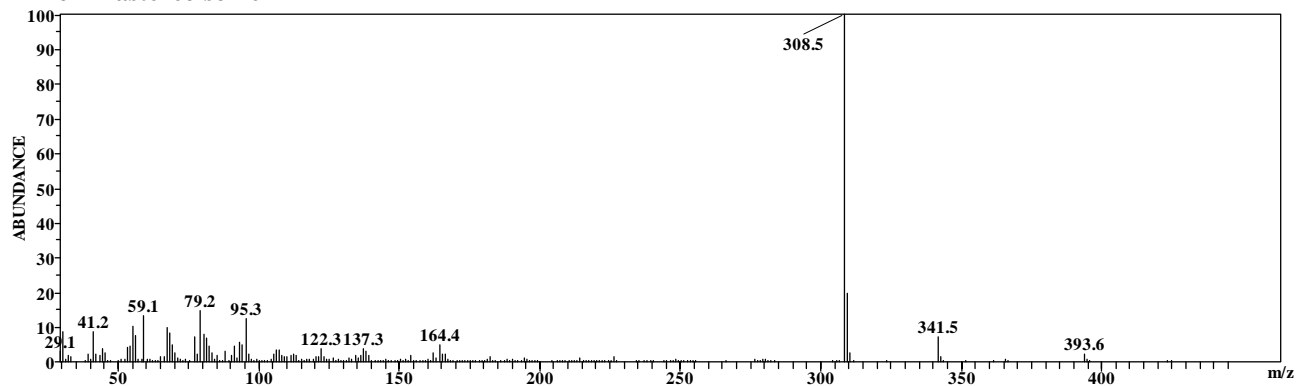

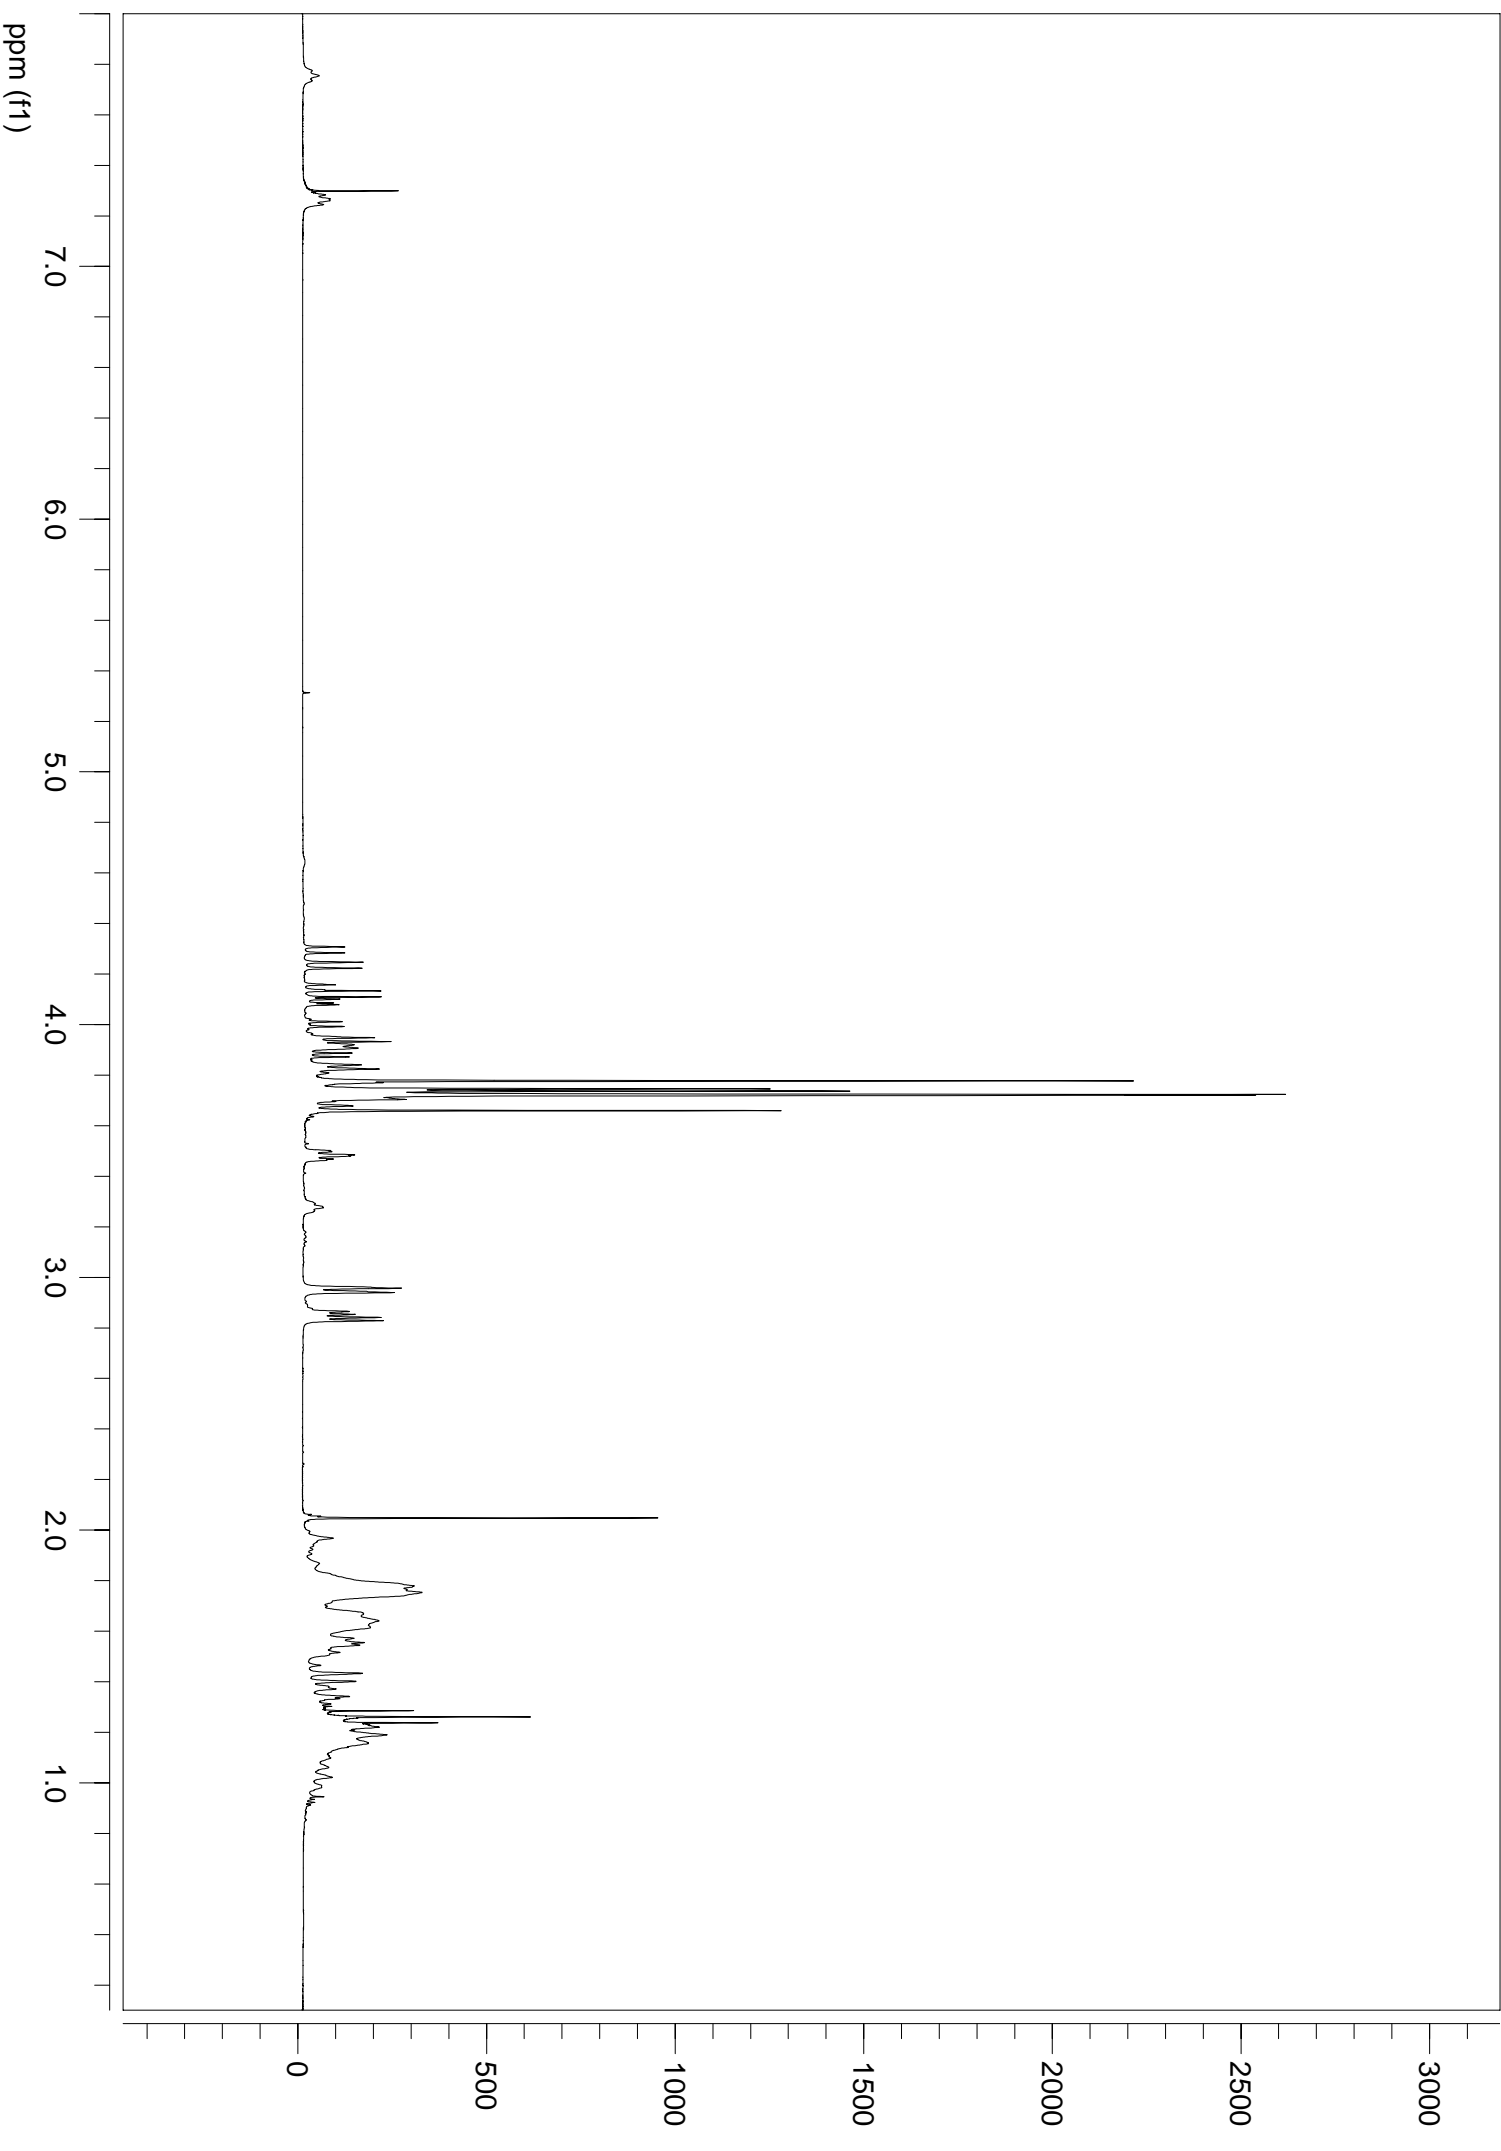

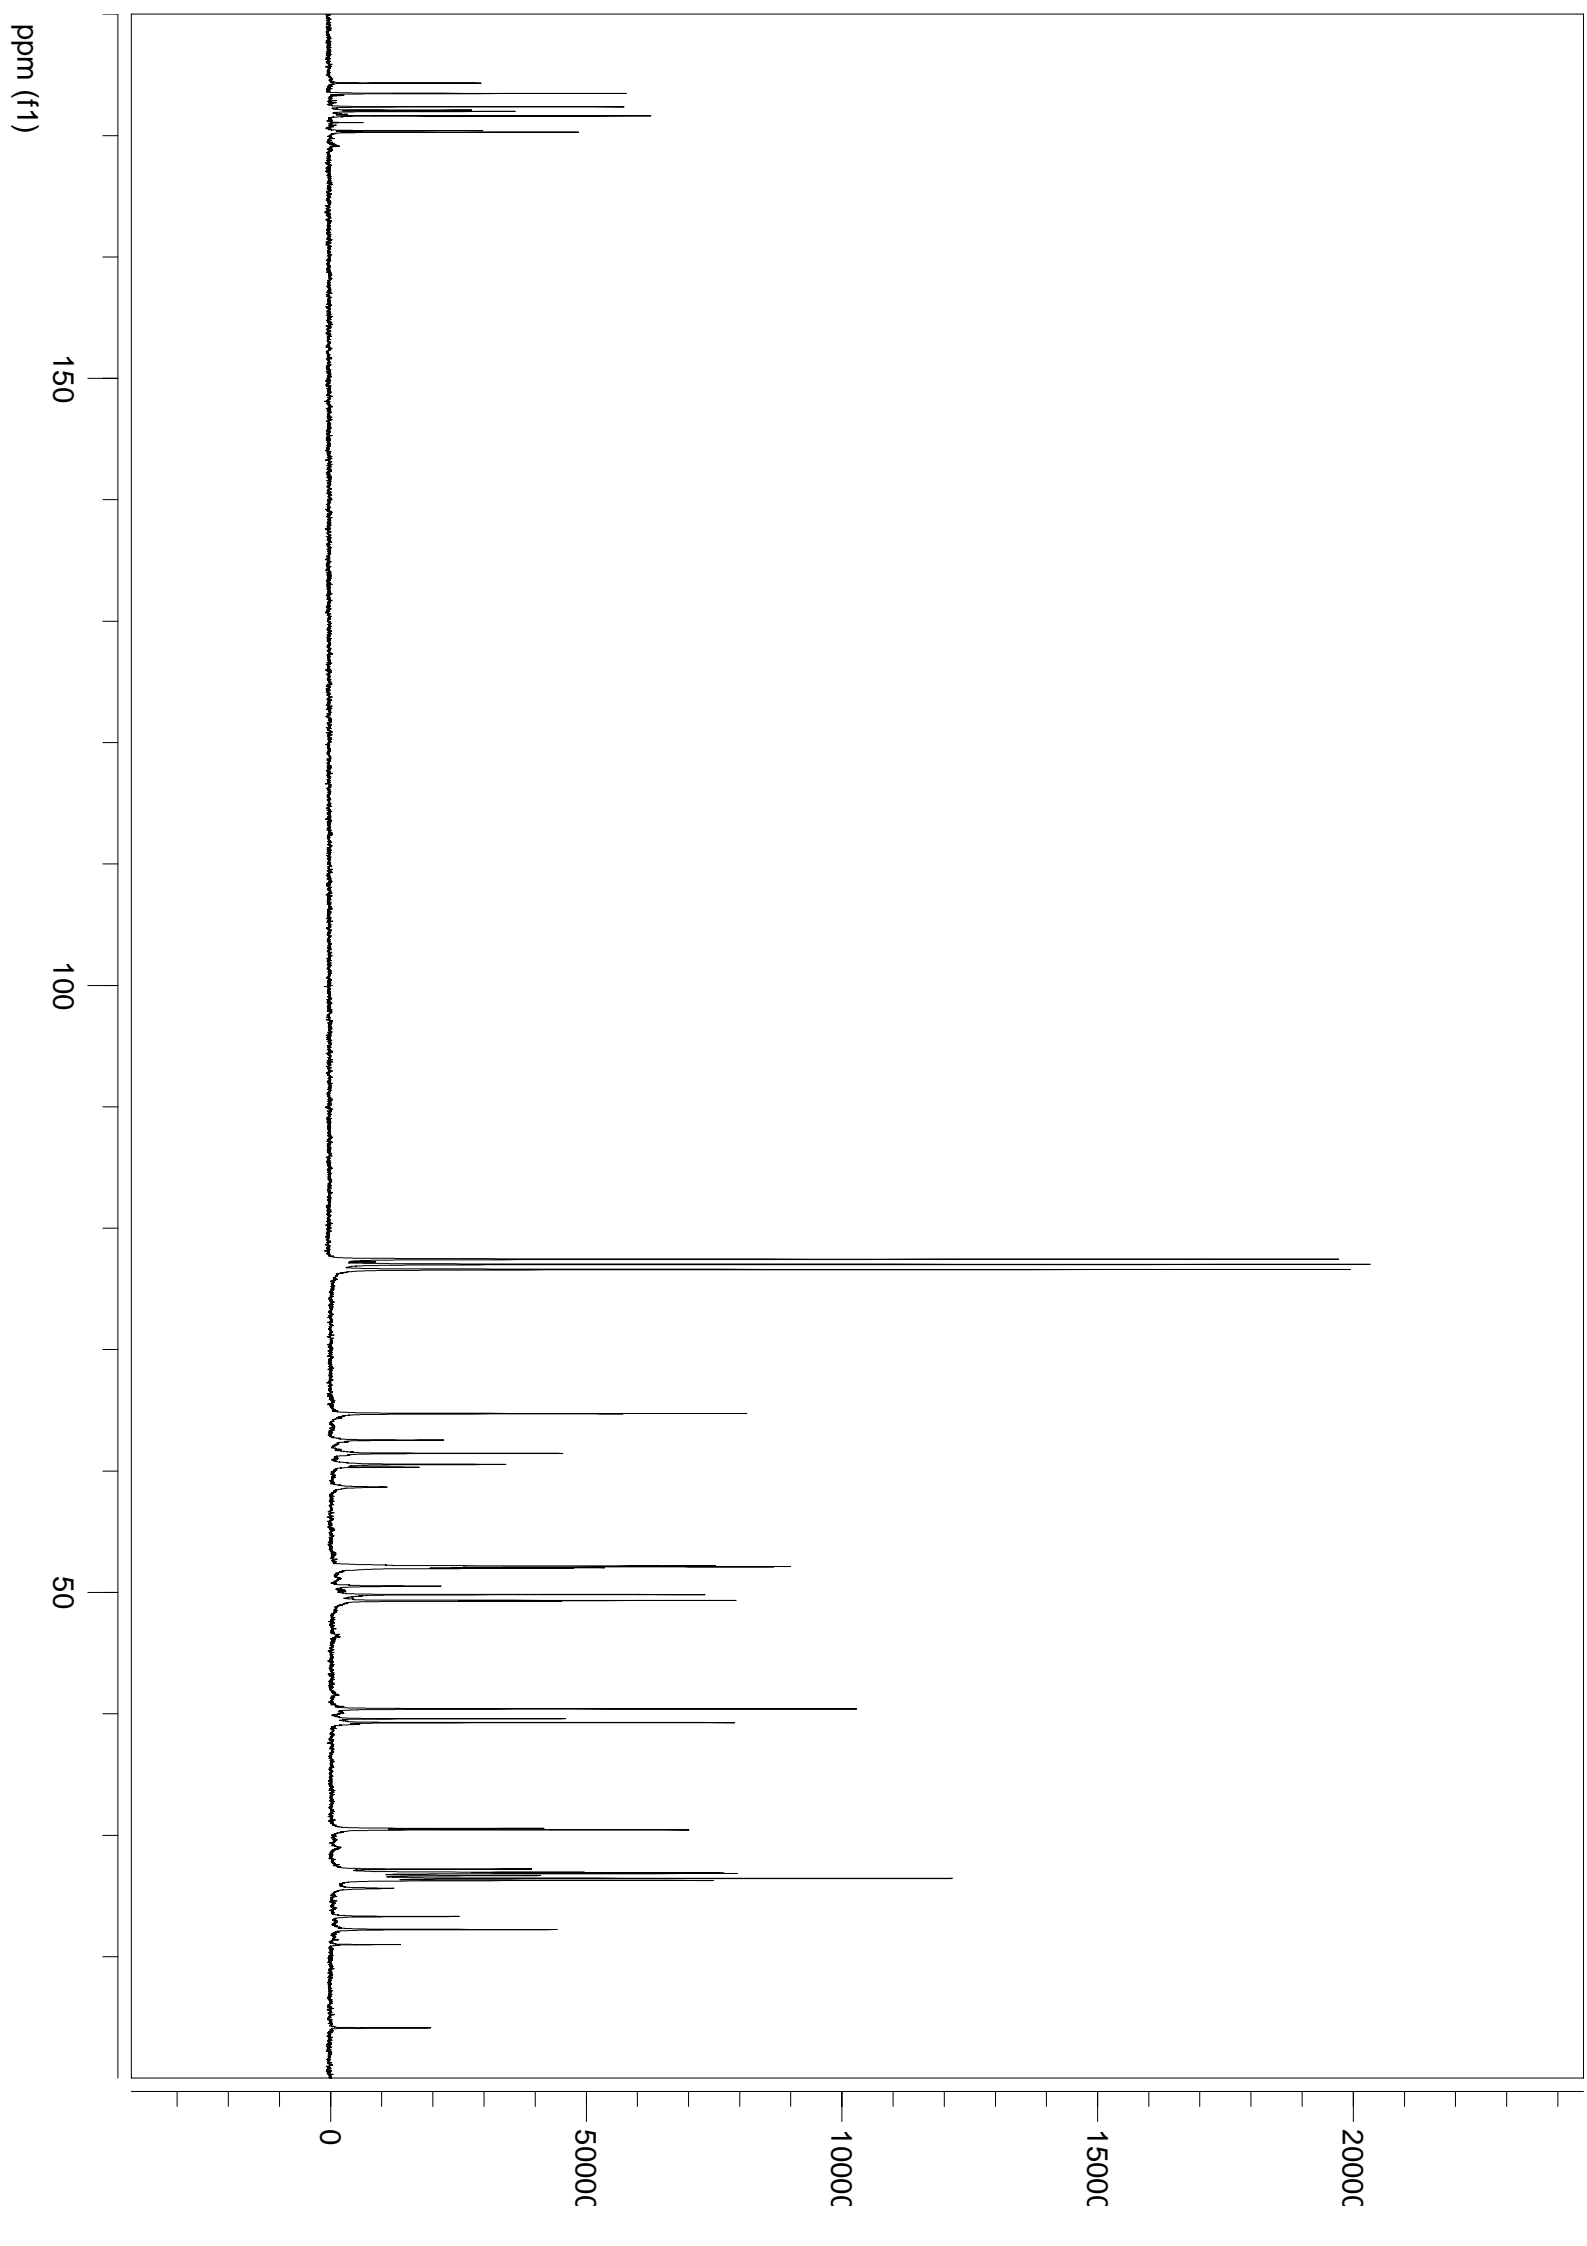

### Compound 13l

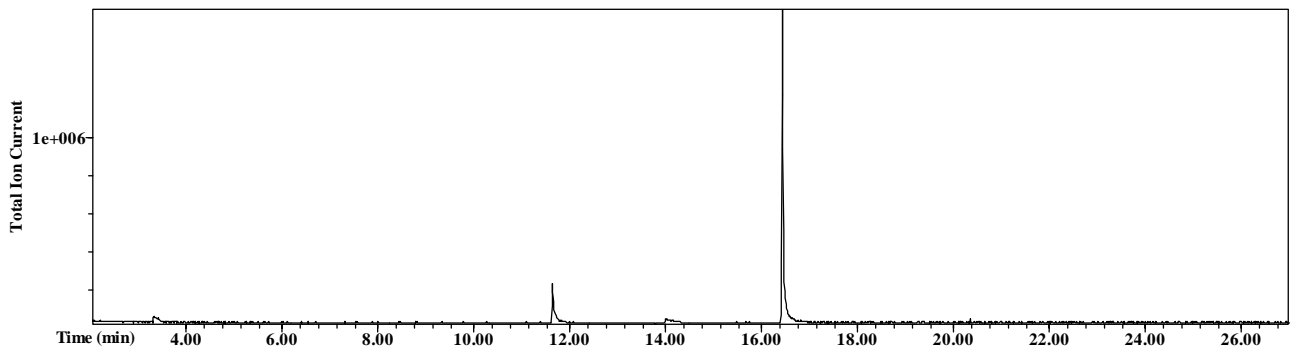

Acquired : 25 Jan 108 3:05 pm using AcqMethod PAOLA

---

| Retention Time | Area | Area % | Ratio % |
|----------------|------|--------|---------|
|----------------|------|--------|---------|

---

#### Total Ion Chromatogram

|        |          |        |         |
|--------|----------|--------|---------|
| 11.659 | 5536395  | 12.882 | 14.787  |
| 16.448 | 37440069 | 87.118 | 100.000 |

---

### Single Diastereoisomer

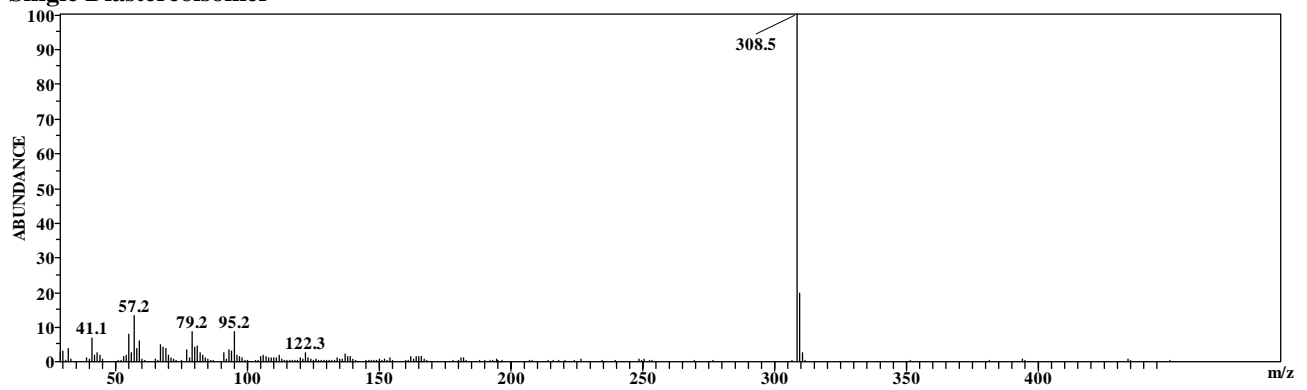

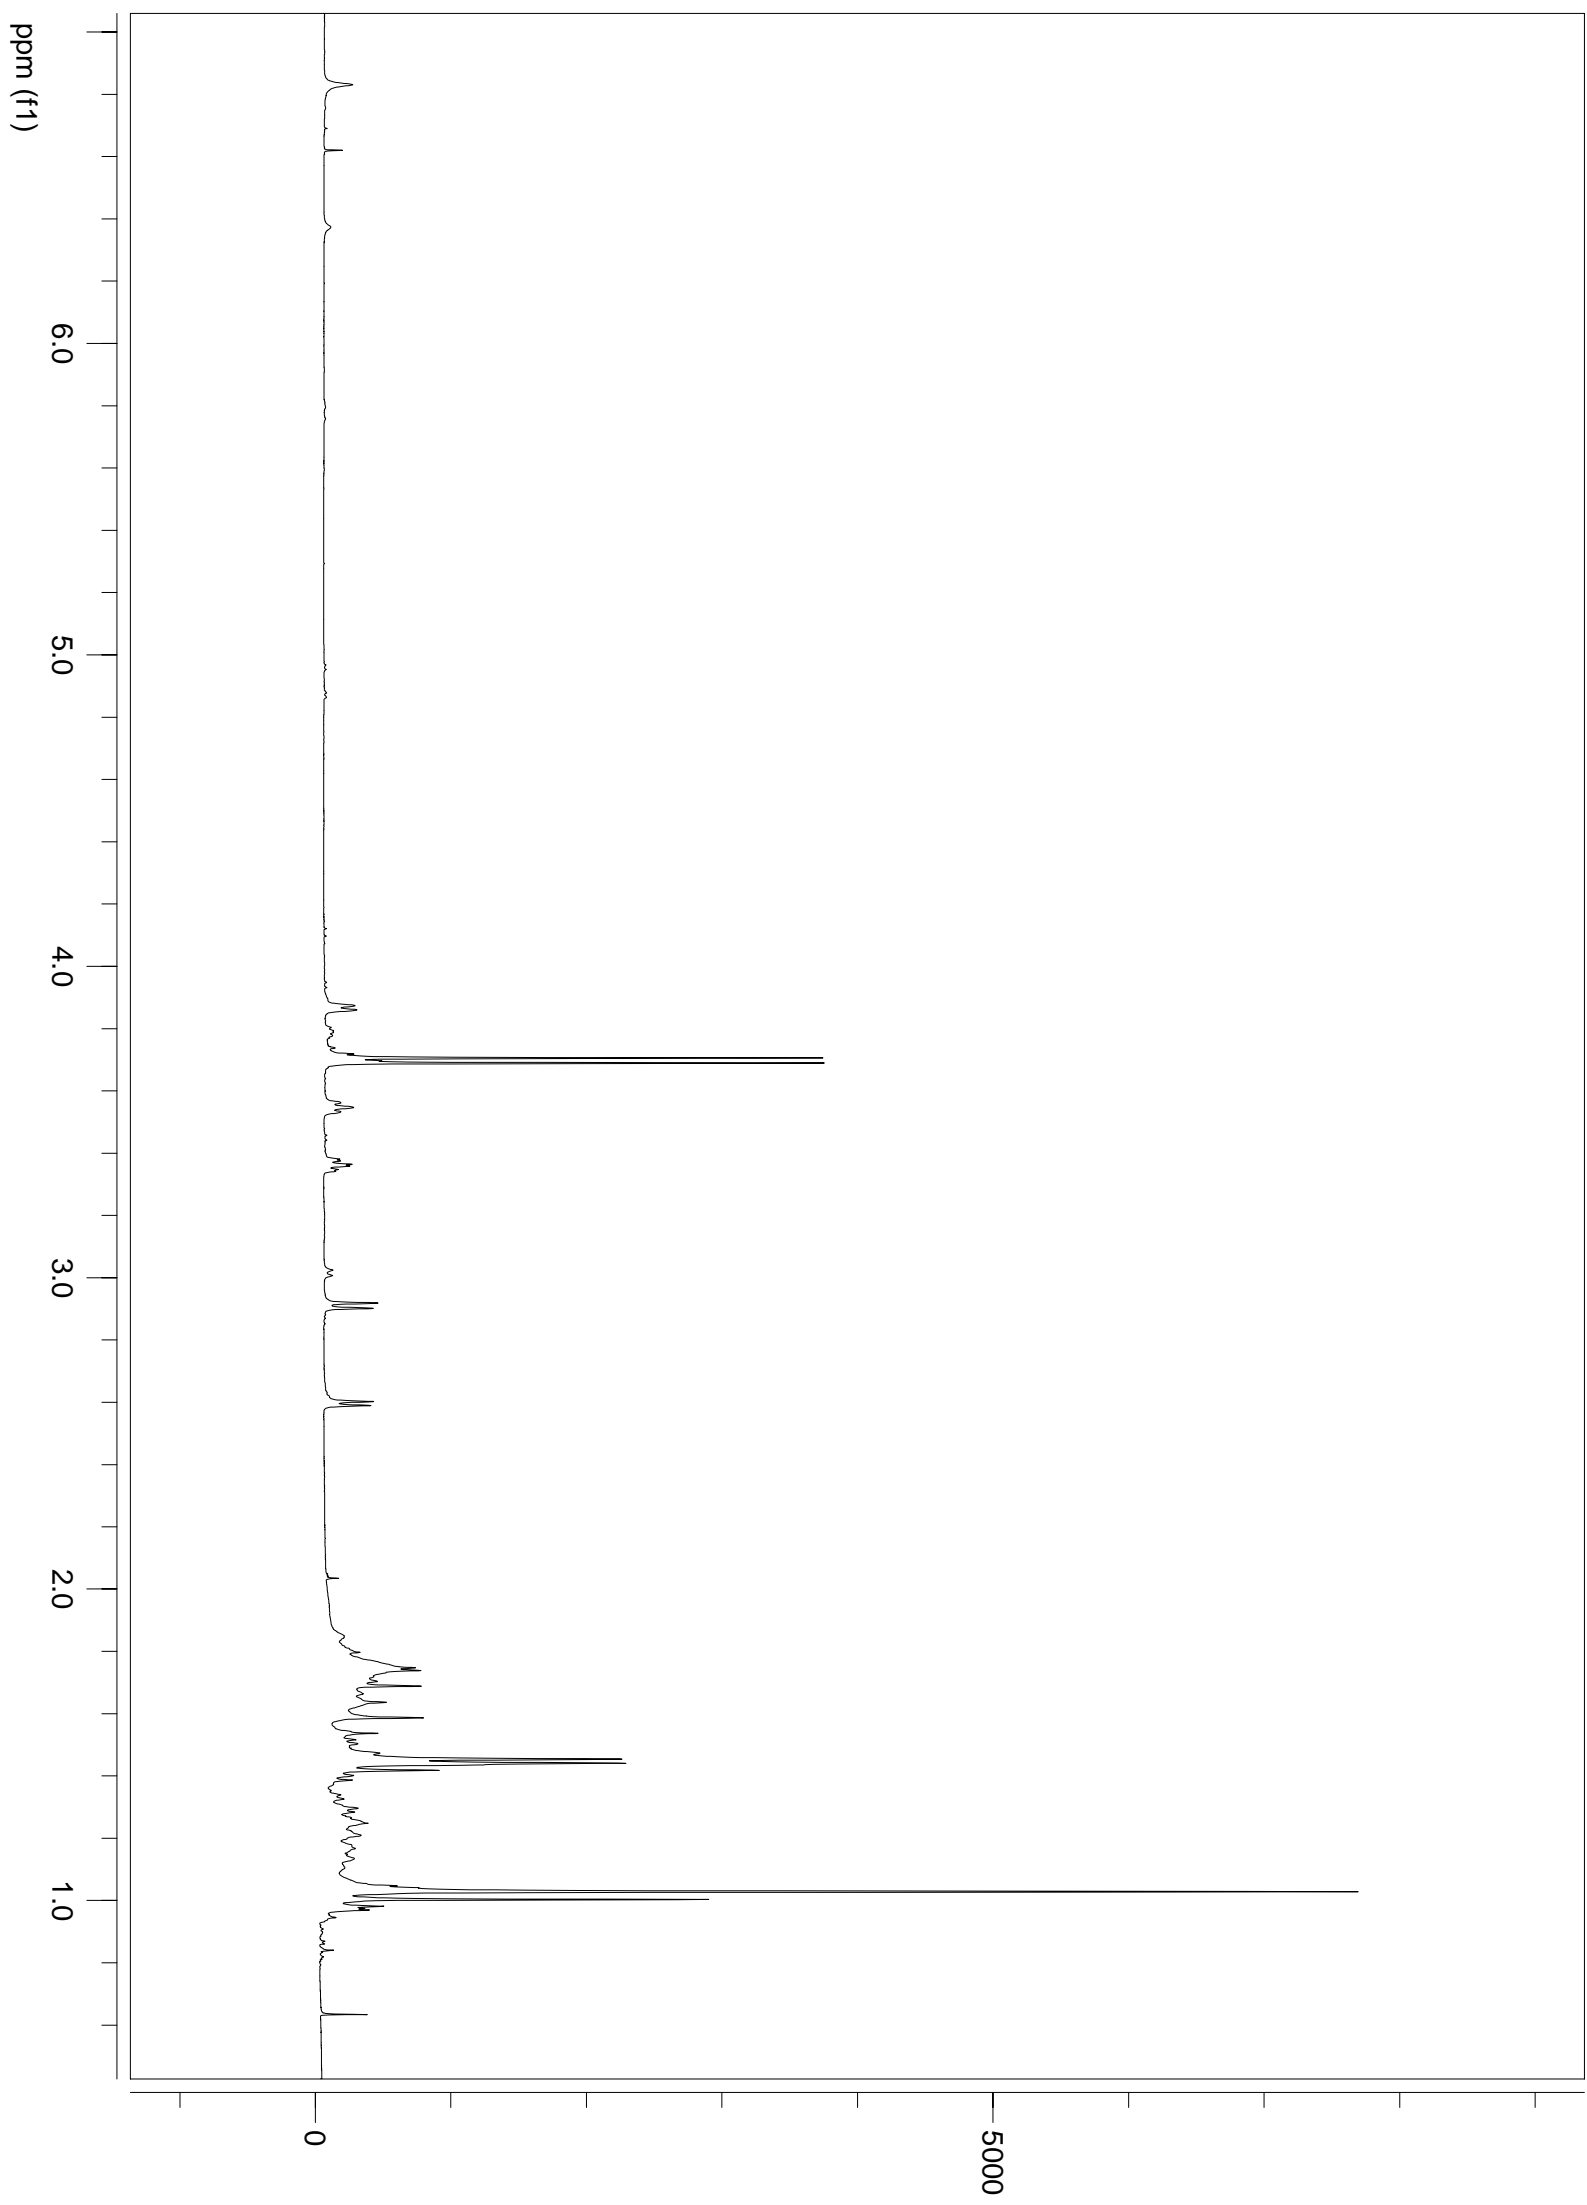

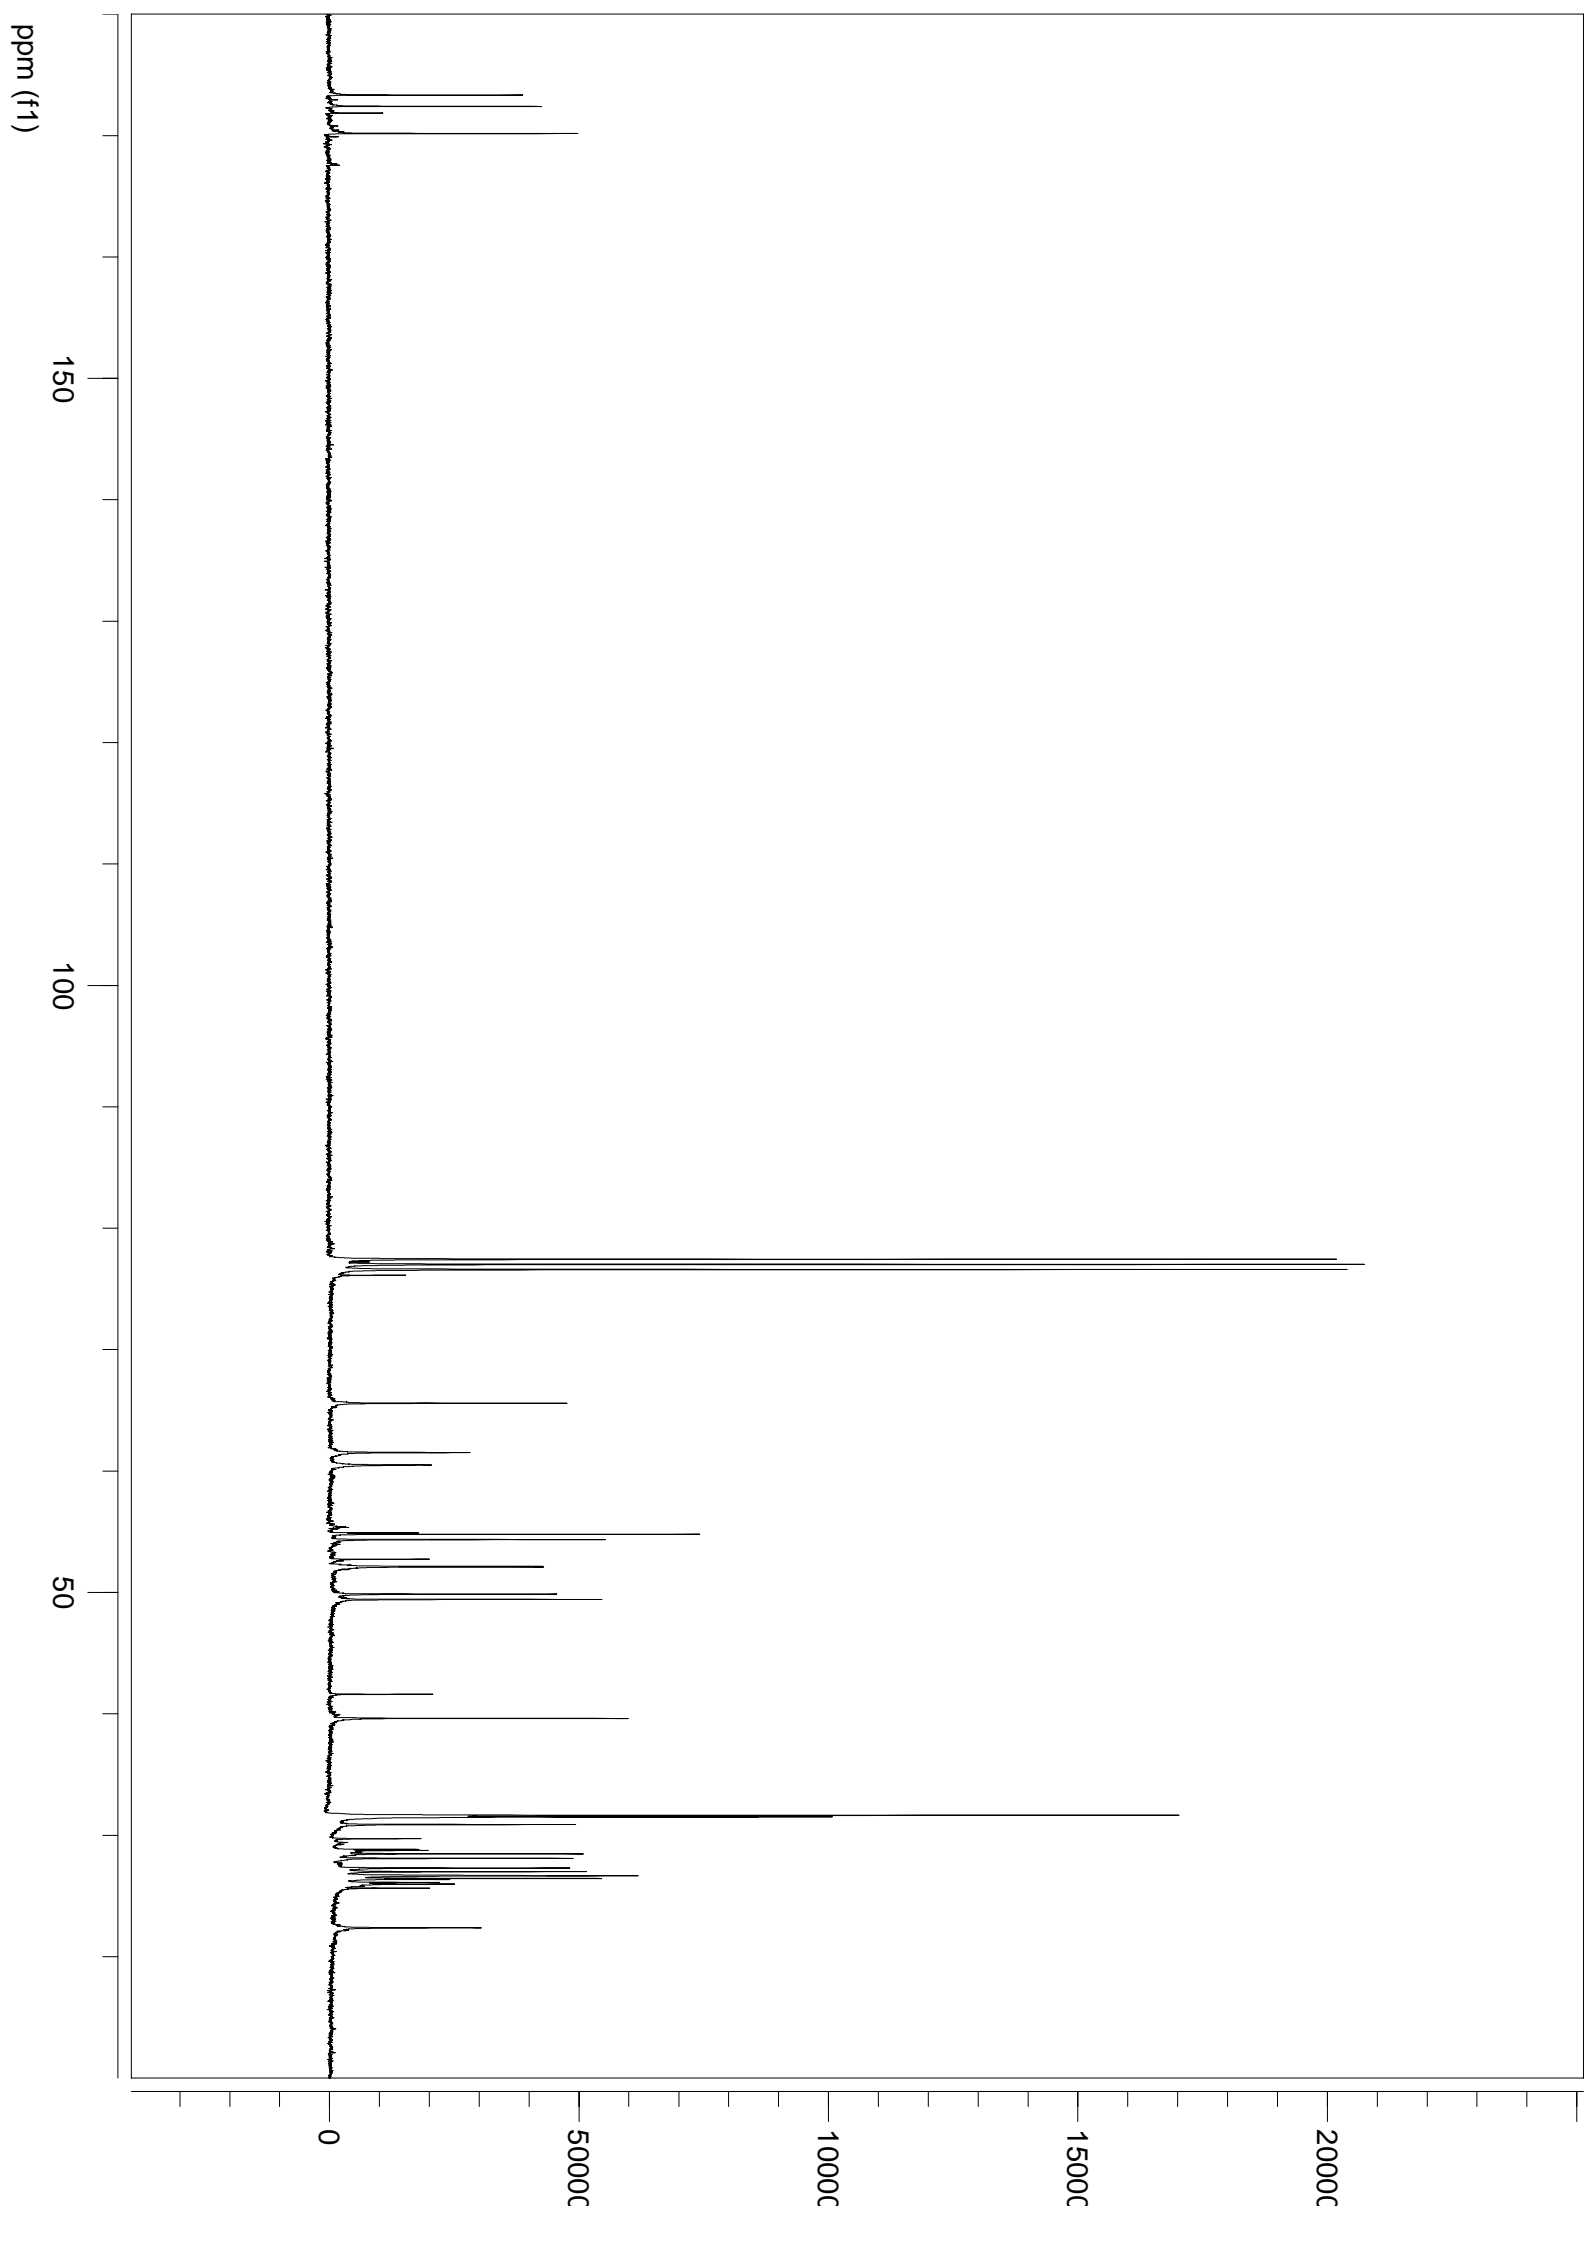

### Compound 13m

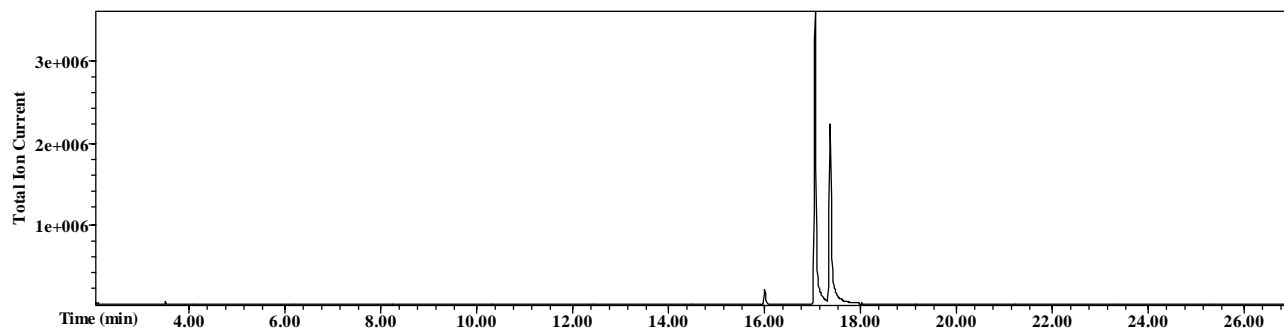

Acquired : 25 Jan 108 5:05 pm using AcqMethod PAOLA

---

| Retention Time | Area | Area % | Ratio % |
|----------------|------|--------|---------|
|----------------|------|--------|---------|

---

#### Total Ion Chromatogram

|        |           |        |         |
|--------|-----------|--------|---------|
| 16.016 | 4428727   | 2.407  | 4.267   |
| 17.070 | 103794386 | 56.401 | 100.000 |
| 17.384 | 75805182  | 41.192 | 73.034  |

---

#### Major Diastereoisomer

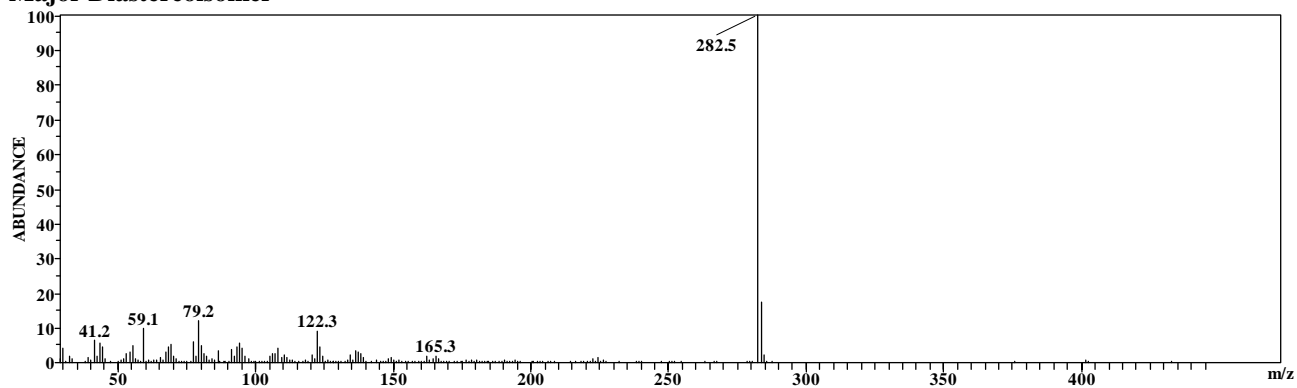

#### Minor Diastereoisomer

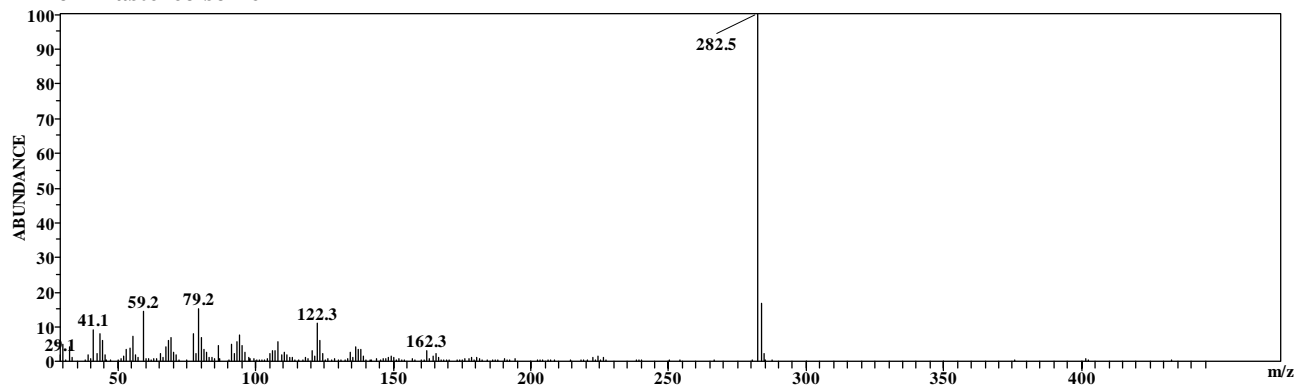



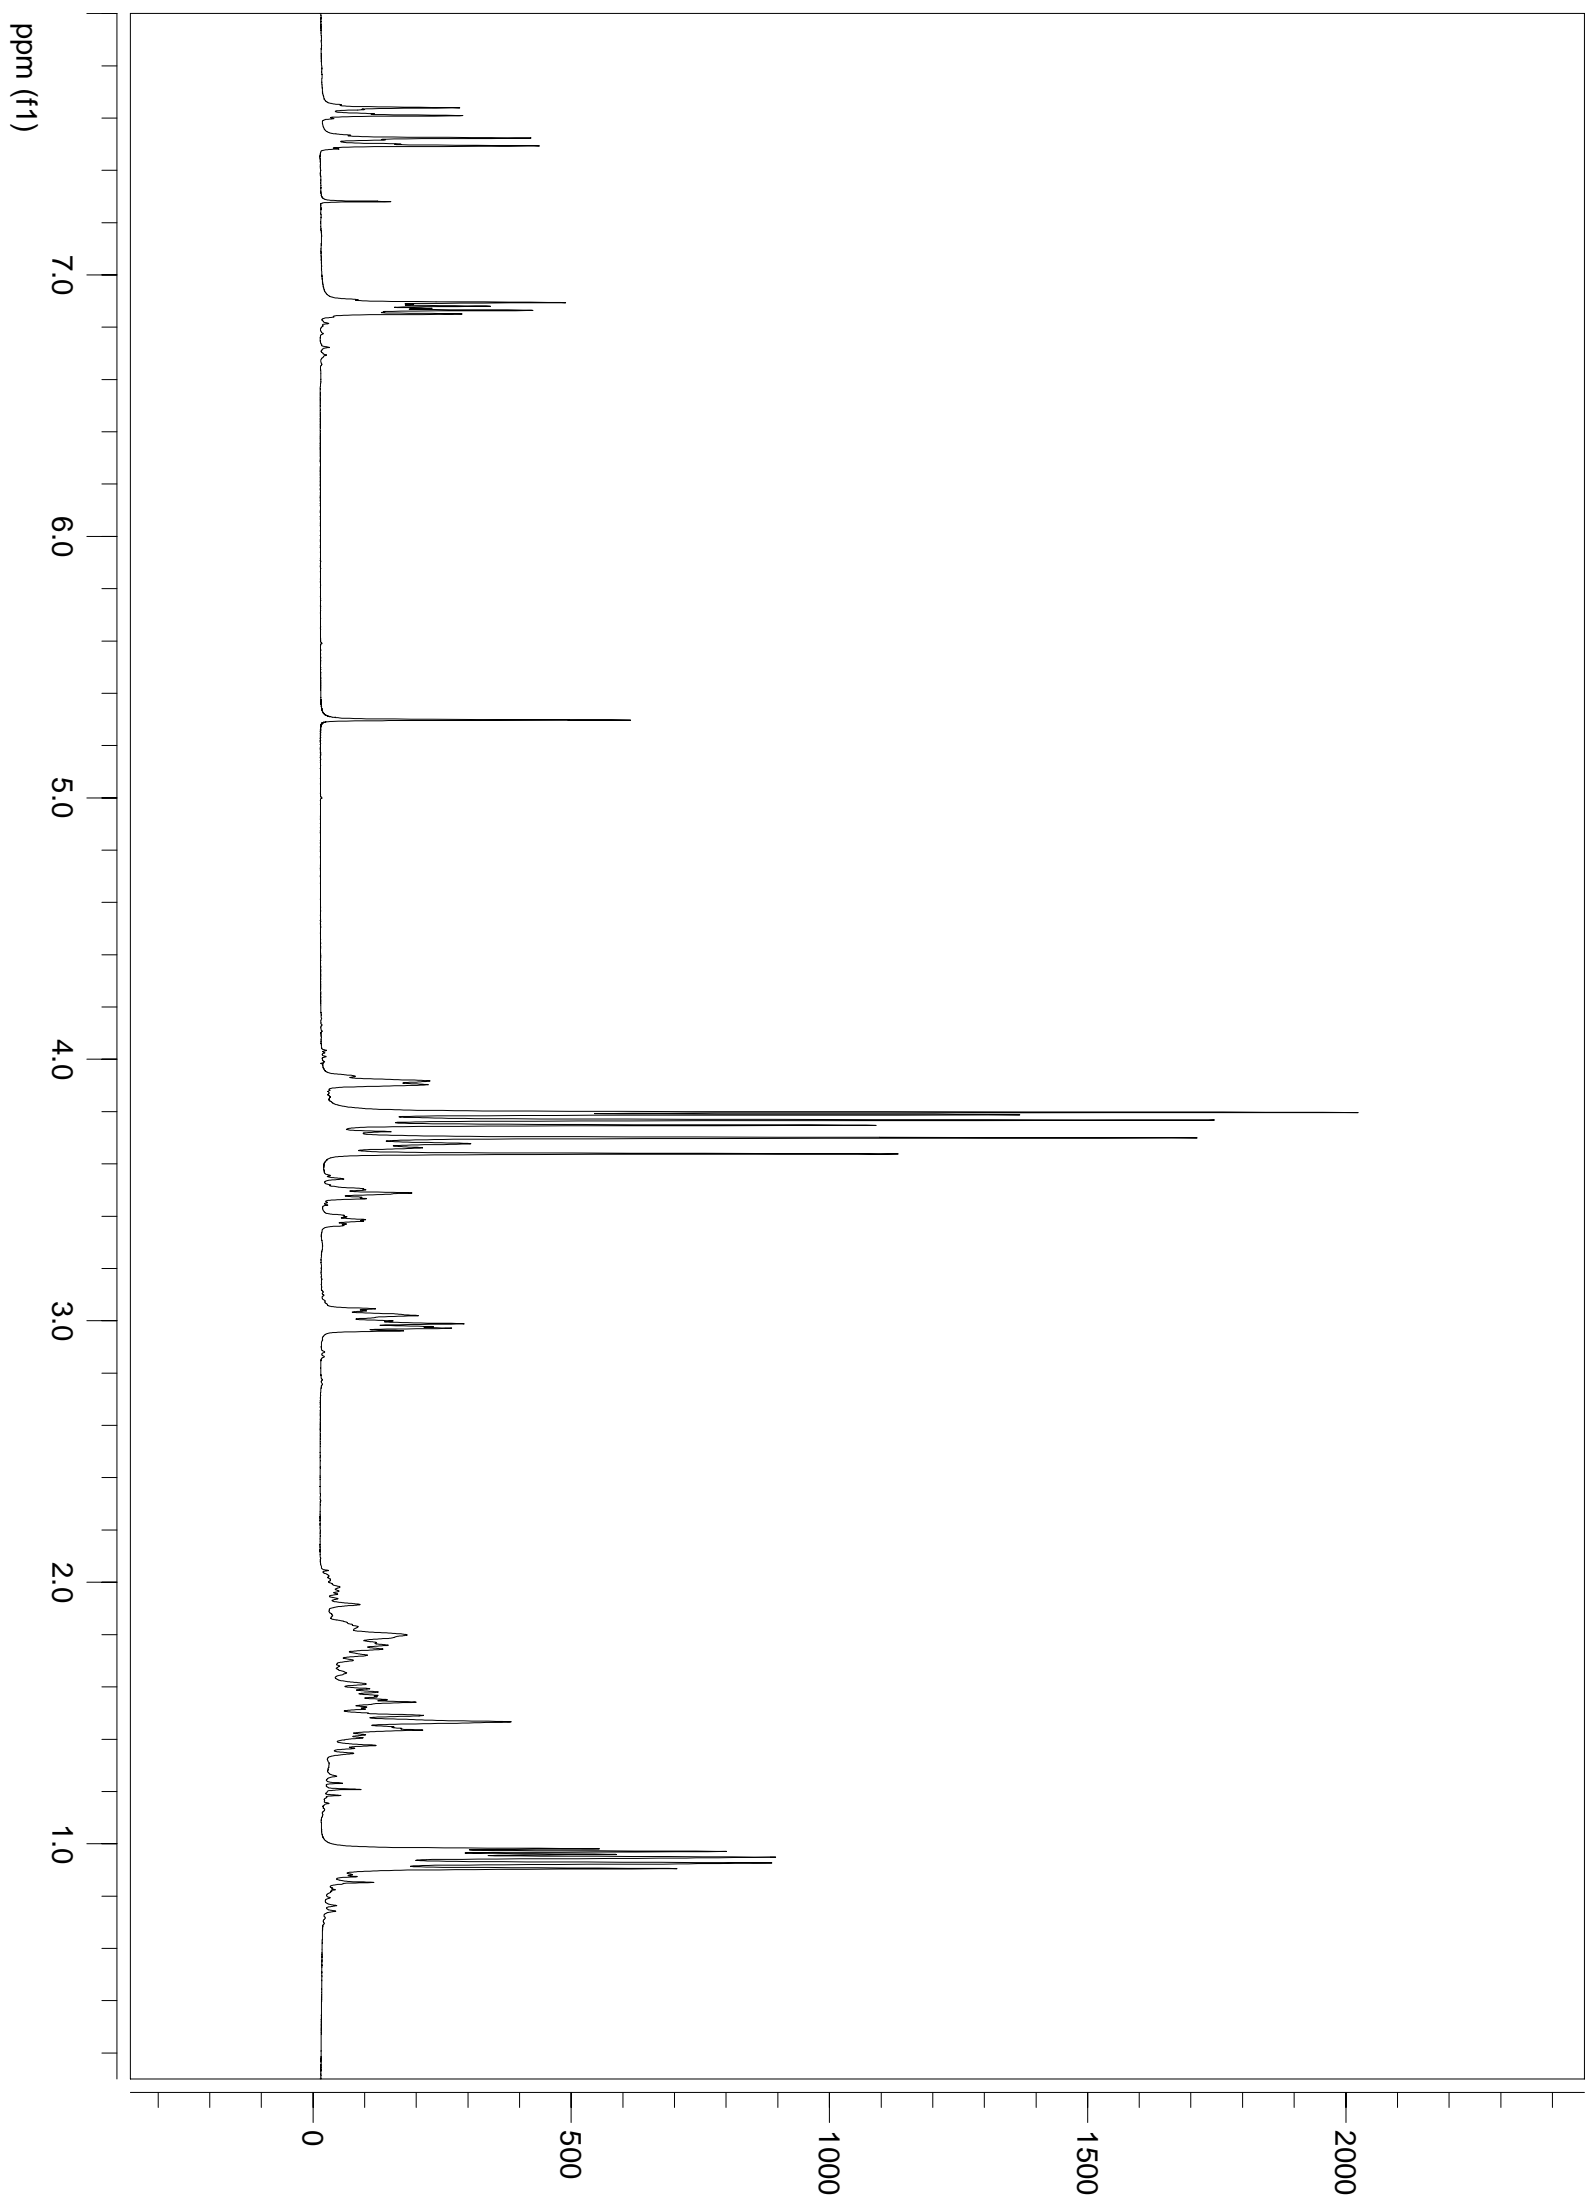

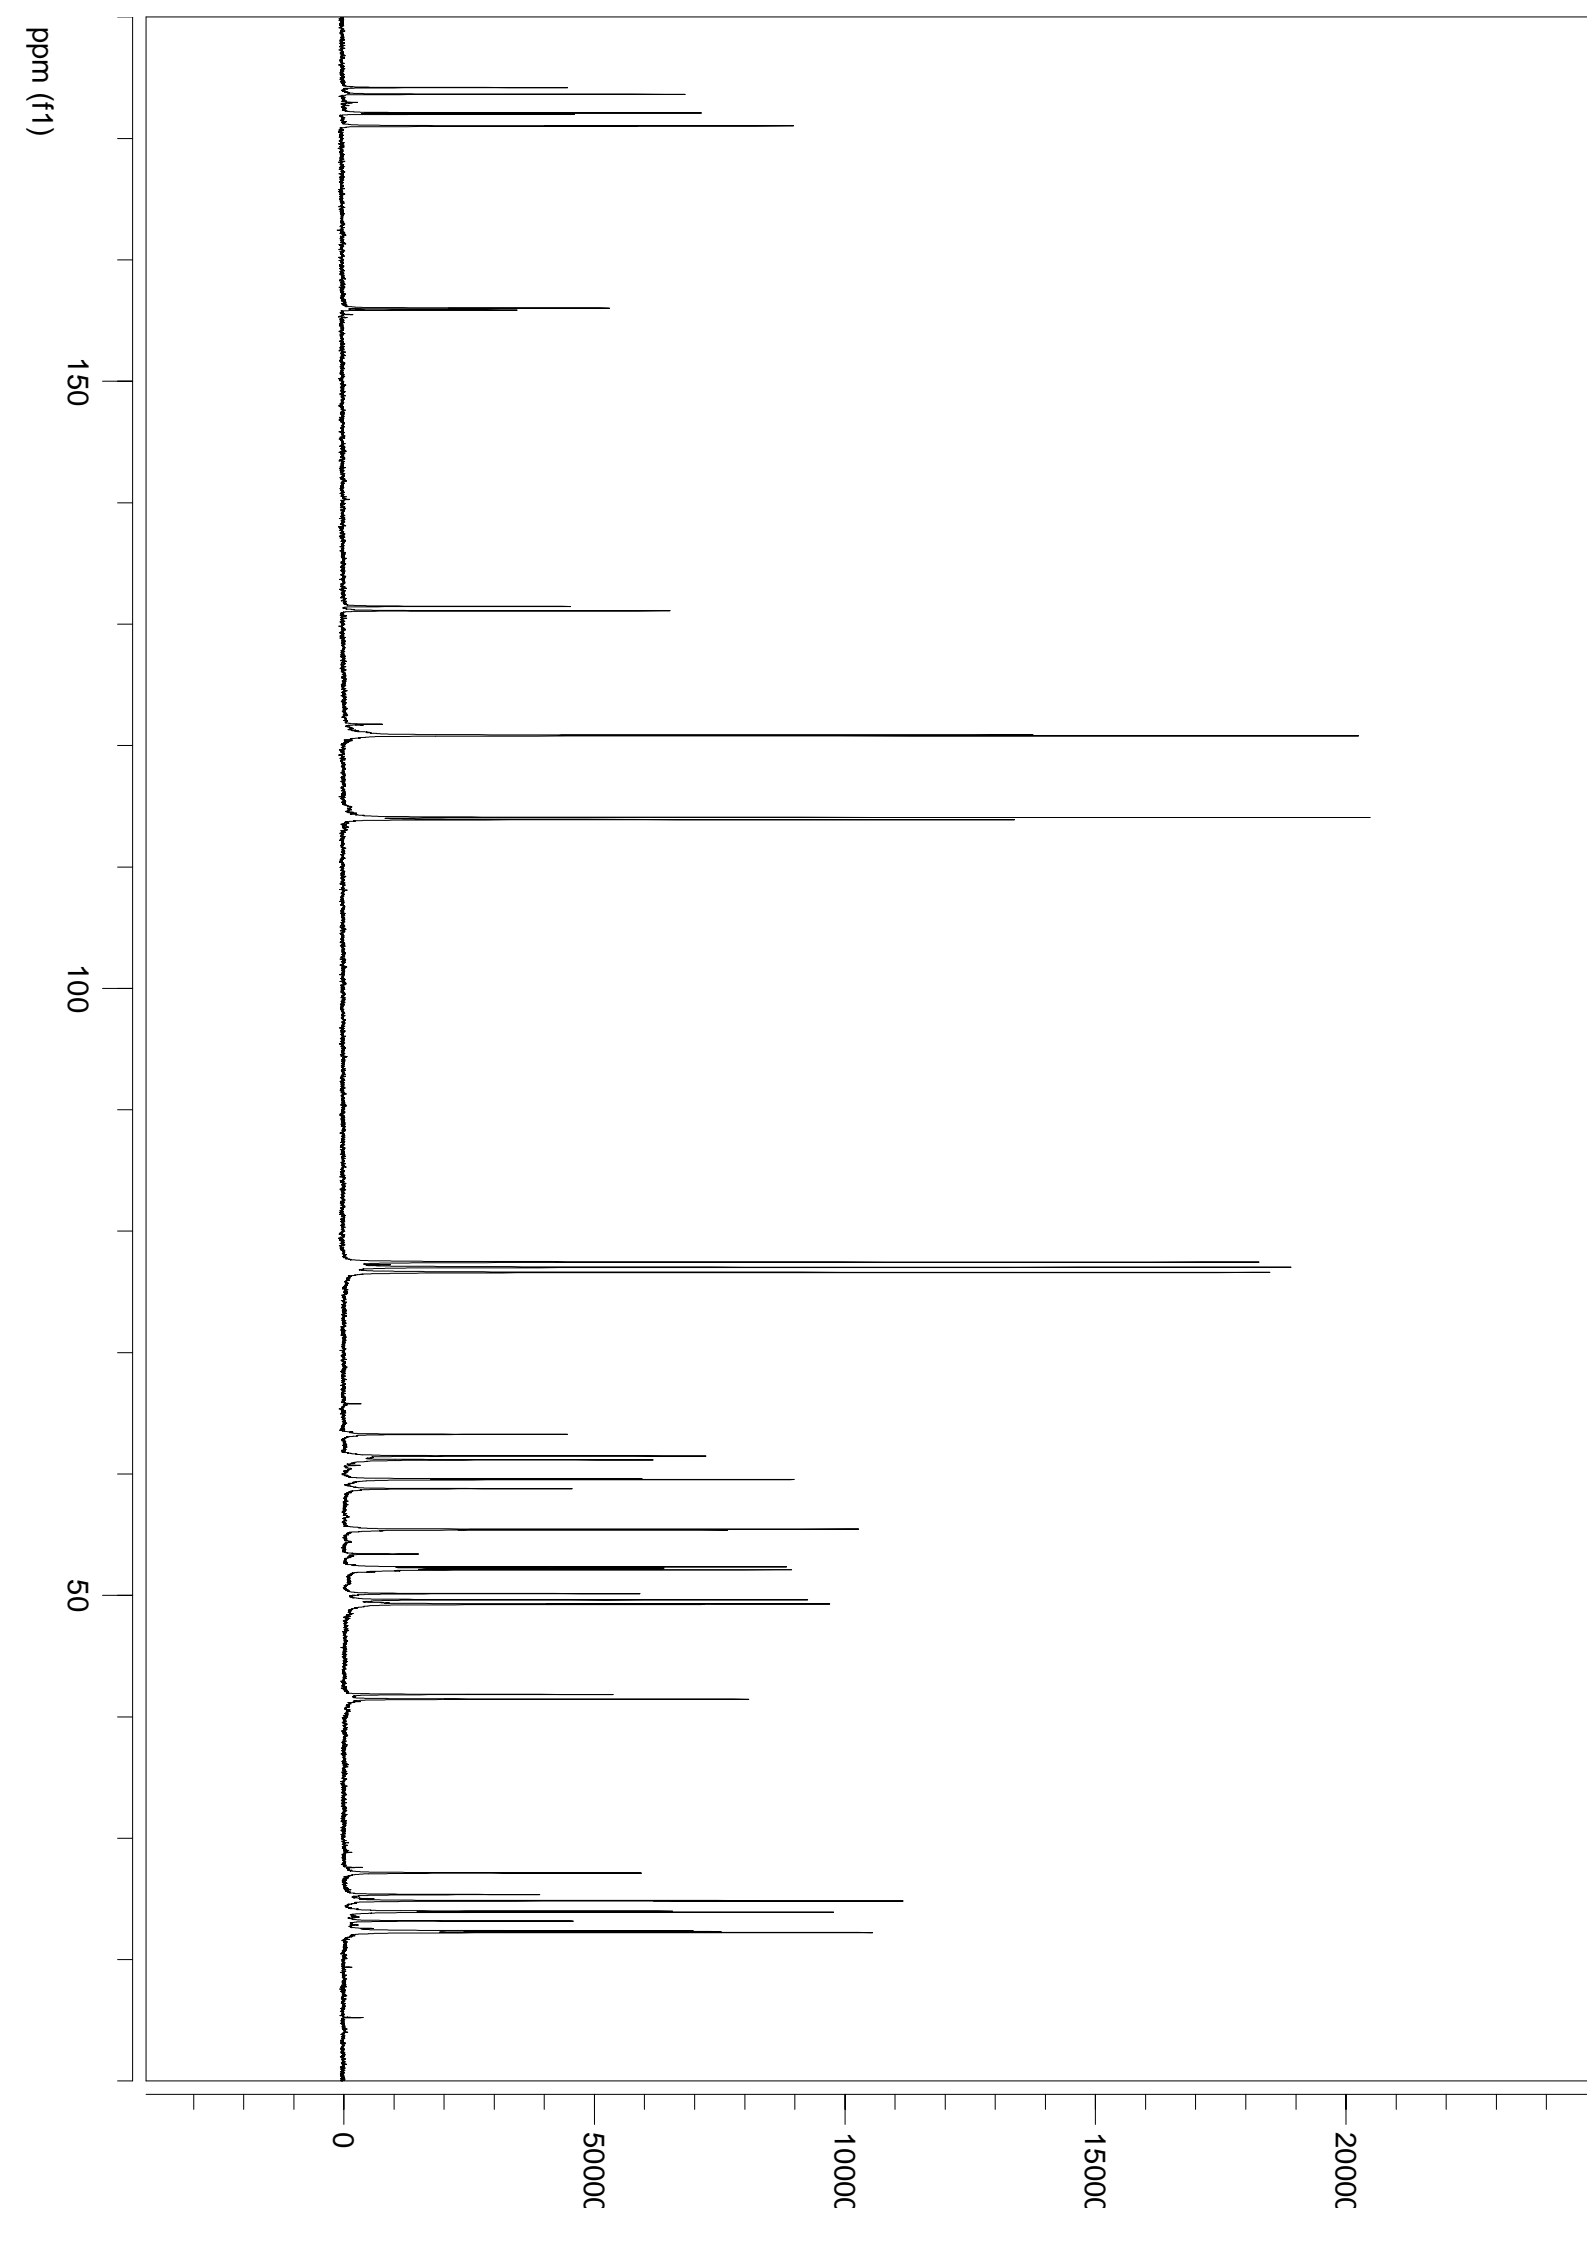

Supplement: b812304g.pdf [file b812304g.pdf]
